# Supplementary material for: Copper-catalyzed divergent construction of naphthofurans and benzochromanes from 2-naphthols, 4-methylene-quinazolin(thi)ones, and N,N-dimethylethanolamine
Source: Royal Society of Chemistry journal article supplement (doi:10.1039/d3qo02053c), 2024-01-01

*Supporting Information*

**Copper-catalyzed divergent construction of naphthofurans and benzochromanes from 2-naphthols, 4-methylene-quinazolin(thi)ones, and *N,N*-dimethylethanolamine**

Meiqi Geng,<sup>a</sup> Jinqiang Kuang,<sup>\*,a</sup> Weiwei Fang,<sup>b</sup> Xuqiong Xiao,<sup>c</sup> and Yongmin Ma<sup>\*,a</sup>

<sup>a</sup>Institute of Advanced Studies and School of Pharmaceutical Sciences, Taizhou University, Jiaojiang 318000, Zhejiang, China.

<sup>b</sup>International Innovation Center for Forest Chemicals and Materials, College of Chemical Engineering, Nanjing Forestry University (NFU), Nanjing 210037, China.

<sup>c</sup>Key Laboratory of Organosilicon Chemistry and Material Technology of Ministry of Education, Hangzhou Normal University, No 2318 Yuhangtang Rd. Hangzhou, 311121, China  
jinqiangkuang@163.com; yongmin.ma@tzc.edu.cn

**Table of contents**

|                                                                                             |         |
|---------------------------------------------------------------------------------------------|---------|
| General information.....                                                                    | S2      |
| General procedure for the synthesis of products <b>3</b> and <b>5</b> .....                 | S2      |
| Synthesis and Characterization of compounds <b>3</b> and <b>5</b> .....                     | S3-S16  |
| One-pot/two-step synthesis of <b>3a</b> and <b>5c</b> .....                                 | S17     |
| Reference.....                                                                              | S18     |
| Crystal data and structure refinement for product <b>3a</b> and <b>5o</b> .....             | S19-S20 |
| <sup>1</sup> H NMR and <sup>13</sup> C NMR spectra of compounds <b>3</b> and <b>5</b> ..... | S21-S61 |

### General information

All commercially available reagents were used without further purification. Analytical TLC was performed on glass-backed plates pre-coated with silica gel, which were visualized by UV fluorescence ( $\lambda_{\text{max}} = 254 \text{ nm}$ ).  $^1\text{H}$  NMR and  $^{13}\text{C}$  NMR spectra were measured on a Bruker 400 MHz spectrometer ( $^1\text{H}$ : 400 MHz;  $^{13}\text{C}$ : 100 MHz), using  $\text{CDCl}_3$  as the solvent with tetramethylsilane (TMS) as an internal standard at room temperature. All  $^1\text{H}$  NMR spectra are reported in parts per million (ppm) downfield of TMS and were measured relative to the signals at 0 ppm (TMS). All  $^{13}\text{C}$  NMR spectra were reported in ppm relative to residual  $\text{CHCl}_3$  (77.0 ppm) and were obtained with  $^1\text{H}$ -decoupling. Data for  $^1\text{H}$  NMR are described as following: chemical shift ( $\delta$  in ppm), multiplicity (s, singlet; d, doublet; t, triplet; q, quartet; quin, quintet; sep, septet; m, multiplet; br, broad signal), coupling constant (Hz), integration. Data for  $^{13}\text{C}$  NMR are described in terms of chemical shift ( $\delta$  in ppm). High resolution mass spectra were recorded on an ESI-Q-TOF mass spectrometer.

4-Methylene-3-substituted quinazolinones and quinazolinthiones are prepared according to the reported procedures.<sup>1</sup> 2-Naphthols used in this paper are commercially available.

### General procedure for the synthesis of products 3 and 5

To an oven-dried 10-mL Schlenk tube were added  $\beta$ -naphthols **1** (0.50 mmol), quinazolinone **2** or quinazolinthione **4** (0.8 mmol, 1.6 equiv),  $\text{Cu}(\text{OAc})_2$  (0.1 mmol, 20 mol%), 4,7-diphenyl-1,10-phenanthroline (0.12 mmol, 24 mol%) and *N,N*-dimethylethanolamine (DMEA) (2 mL) under air. The resulting mixture was then stirred at 120 °C (heating mantle) for 5 h and then cooled to room temperature. The reaction mixture was diluted with  $\text{CH}_2\text{Cl}_2$  (30 mL) and washed with  $\text{H}_2\text{O}$  (10 mL  $\times$  3). The organic fraction was then dried over anhydrous  $\text{Na}_2\text{SO}_4$ . Filtration, concentration, and purification by flash chromatography on silica gel (eluent: PE & EA) afforded products **3** or **5**.

## Synthesis and Characterization of compounds 3 and 5

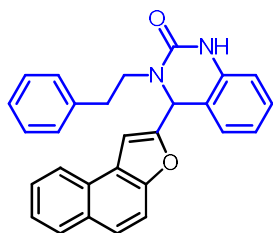

### 4-(Naphtho[2,1-*b*]furan-2-yl)-3-phenethyl-3,4-dihydroquinazolin-2(1*H*)-one (3a)

The title compound was obtained as a white solid (152.6 mg, 73%). Mp: 171.4–172.7 °C.

**<sup>1</sup>H NMR (400 MHz, DMSO-*d*<sub>6</sub>)** δ 9.66 (s, 1H), 8.28 (d, *J* = 8.0 Hz, 1H), 8.01 (d, *J* = 8.0 Hz, 1H), 7.80 (d, *J* = 9.2 Hz, 1H), 7.73 (d, *J* = 9.2 Hz, 1H), 7.62 (t, *J* = 7.6 Hz, 1H), 7.51 (t, *J* = 7.6 Hz, 1H), 7.46 (s, 1H), 7.31–7.14 (m, 7H), 6.99–6.88 (m, 2H), 6.07 (s, 1H), 4.13–3.98 (m, 1H), 3.34–3.20 (m, 1H), 3.05–2.89 (m, 1H), 2.80–2.67 (m, 1H). **<sup>13</sup>C NMR (100 MHz, DMSO-*d*<sub>6</sub>)** δ 156.7, 153.2, 152.4, 139.5, 137.6, 130.3, 129.1, 129.1, 128.8, 127.6, 127.1, 127.0, 126.6, 125.8, 125.2, 124.1, 123.2, 121.7, 118.9, 114.3, 112.8, 103.5, 56.8, 47.5, 34.0. **HRMS (ESI-TOF) *m/z*** calcd. for C<sub>28</sub>H<sub>23</sub>N<sub>2</sub>O<sub>2</sub><sup>+</sup> [M+H]<sup>+</sup>: 419.1754; found: 419.1756.

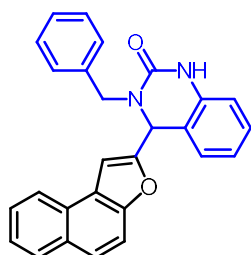

### 3-Benzyl-4-(naphtho[2,1-*b*]furan-2-yl)-3,4-dihydroquinazolin-2(1*H*)-one (3b)

The title compound was obtained as a white solid (131.3 mg, 65%). Mp: 198.8–200.4 °C.

**<sup>1</sup>H NMR (400 MHz, DMSO-*d*<sub>6</sub>)** δ 9.79 (s, 1H), 8.25 (d, *J* = 8.0 Hz, 1H), 8.01 (d, *J* = 8.4 Hz, 1H), 7.80 (d, *J* = 8.8 Hz, 1H), 7.72 (d, *J* = 8.8 Hz, 1H), 7.61 (t, *J* = 7.6 Hz, 1H), 7.51 (t, *J* = 7.4 Hz, 1H), 7.44 (s, 1H), 7.35–7.29 (m, 4H), 7.27–7.23 (m, 1H), 7.23–7.16 (m, 2H), 6.96 (d, *J* = 8.0 Hz, 1H), 6.89 (t, *J* = 7.4 Hz, 1H), 5.89 (s, 1H), 5.25 (d, *J* = 15.6 Hz, 1H), 4.08 (d, *J* = 15.6 Hz, 1H). **<sup>13</sup>C NMR (100 MHz, DMSO-*d*<sub>6</sub>)** δ 156.1, 153.5, 152.4, 138.1, 137.5, 130.3, 129.2, 129.1, 129.0, 128.8, 127.9, 127.63, 127.56, 127.2, 127.0, 125.8, 125.2, 124.1, 123.2, 121.9, 118.6, 114.5, 112.8, 103.9, 56.3, 48.1. **HRMS (ESI-TOF) *m/z*** calcd. for C<sub>27</sub>H<sub>21</sub>N<sub>2</sub>O<sub>2</sub><sup>+</sup> [M+H]<sup>+</sup>: 405.1598; found: 405.1595.

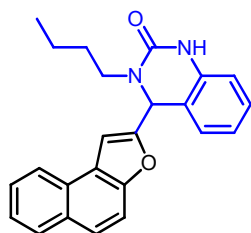

### 3-butyl-4-(Naphtho[2,1-*b*]furan-2-yl)-3,4-dihydroquinazolin-2(1*H*)-one (3c)

The title compound was obtained as a white solid (92.7 mg, 50%). Mp: 173.9–175.8 °C.

**<sup>1</sup>H NMR (400 MHz, DMSO-*d*<sub>6</sub>)** δ 9.55 (s, 1H), 8.26 (d, *J* = 8.4 Hz, 1H), 8.01 (d, *J* = 8.0 Hz, 1H), 7.79 (d, *J* = 9.2 Hz, 1H), 7.72 (d, *J* = 9.2 Hz, 1H), 7.61 (t, *J* = 7.6 Hz, 1H), 7.51 (t, *J* = 7.6 Hz, 1H), 7.41 (s, 1H), 7.26 (d, *J* = 7.6 Hz, 1H), 7.20 (t, *J* = 7.8 Hz, 1H), 6.99-6.80 (m, 2H), 6.05 (s, 1H), 3.97-3.70 (m, 1H), 3.09-2.86 (m, 1H), 1.68-1.36 (m, 2H), 1.32-1.18 (m, 2H), 0.84 (t, *J* = 7.4 Hz, 3H). **<sup>13</sup>C NMR (100 MHz, DMSO-*d*<sub>6</sub>)** δ 156.8, 153.4, 152.3, 137.7, 130.3, 129.1, 127.5, 127.1, 127.0, 125.8, 125.2, 124.1, 123.2, 121.6, 119.0, 114.2, 112.8, 103.4, 56.4, 45.1, 29.8, 19.9, 14.2. **HRMS (ESI-TOF)** *m/z* calcd. for C<sub>24</sub>H<sub>23</sub>N<sub>2</sub>O<sub>2</sub><sup>+</sup> [M+H]<sup>+</sup>: 371.1754; found: 371.1750.

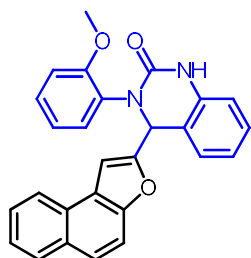

**3-(2-Methoxyphenyl)-4-(naphtho[2,1-*b*]furan-2-yl)-3,4-dihydroquinazolin-2(1H)-one (3d)**

The title compound was obtained as a white solid (176.6 mg, 84%). Mp: 245.0-246.9 °C.

**<sup>1</sup>H NMR (400 MHz, DMSO-*d*<sub>6</sub>)** δ 9.81 (s, 1H), 8.19 (d, *J* = 8.4 Hz, 1H), 7.99 (d, *J* = 8.0 Hz, 1H), 7.79 (d, *J* = 8.8 Hz, 1H), 7.74 (d, *J* = 8.8 Hz, 1H), 7.57 (t, *J* = 7.6 Hz, 1H), 7.49 (t, *J* = 7.6 Hz, 1H), 7.33 (s, 1H), 7.28-7.16 (m, 3H), 7.15-6.94 (m, 3H), 6.91 (t, *J* = 7.6 Hz, 1H), 6.84-6.70 (m, 1H), 6.13 (s, 1H), 3.72 (s, 3H). **<sup>13</sup>C NMR (100 MHz, DMSO-*d*<sub>6</sub>)** δ 156.7, 152.4, 152.2, 137.5, 131.2, 130.3, 129.5, 129.2, 129.1, 127.6, 127.2, 127.0, 125.8, 125.2, 124.1, 123.2, 121.9, 120.6, 119.2, 114.5, 112.8, 112.6, 103.9, 59.4, 56.0. **HRMS (ESI-TOF)** *m/z* calcd. for C<sub>27</sub>H<sub>21</sub>N<sub>2</sub>O<sub>3</sub><sup>+</sup> [M+H]<sup>+</sup>: 421.1547; found: 421.1544.

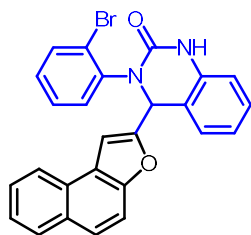

**3-(2-Bromophenyl)-4-(naphtho[2,1-*b*]furan-2-yl)-3,4-dihydroquinazolin-2(1H)-one (3e)**

The title compound was obtained as a white solid (177.8 mg, 76%). Mp: 153.4-155.2 °C.

**<sup>1</sup>H NMR (400 MHz, DMSO-*d*<sub>6</sub>)** δ 10.04 (s, 1H), 8.20 (d, *J* = 8.4 Hz, 1H), 8.01 (d, *J* = 8.0 Hz, 1H), 7.84-7.74 (m, 3H), 7.59 (t, *J* = 7.0 Hz, 1H), 7.50 (t, *J* = 7.0 Hz, 1H), 7.42 (s, 1H), 7.34-7.19 (m, 4H), 7.02 (d, *J* = 6.8 Hz, 1H), 6.99-6.89 (m, 2H), 6.15 (s, 1H). **<sup>13</sup>C NMR (100 MHz, DMSO-*d*<sub>6</sub>)** δ 156.1, 152.4, 152.0, 139.9, 137.2, 133.6, 132.5, 130.4, 130.1, 129.3, 129.1, 128.7, 127.6, 127.2, 127.1, 126.0, 125.3, 124.1, 123.2, 123.1, 122.2, 119.1, 114.8, 112.9, 104.3, 59.4. **HRMS (ESI-TOF)** *m/z* calcd. for C<sub>26</sub>H<sub>18</sub>BrN<sub>2</sub>O<sub>2</sub><sup>+</sup> [M+H]<sup>+</sup>: 469.0546; found: 469.0544.

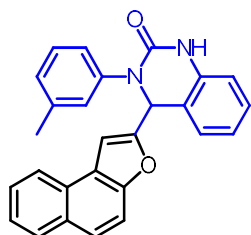

#### 4-(Naphtho[2,1-*b*]furan-2-yl)-3-(*m*-tolyl)-3,4-dihydroquinazolin-2(1*H*)-one (3f)

The title compound was obtained as a white solid (169.7 mg, 84%). Mp: 247.9-249.3 °C.

**<sup>1</sup>H NMR (400 MHz, DMSO-*d*<sub>6</sub>)** δ 9.93 (s, 1H), 8.22 (d, *J* = 8.0 Hz, 1H), 7.99 (d, *J* = 8.0 Hz, 1H), 7.78 (d, *J* = 9.2 Hz, 1H), 7.73 (d, *J* = 8.8 Hz, 1H), 7.57 (t, *J* = 7.6 Hz, 1H), 7.48 (t, *J* = 7.6 Hz, 1H), 7.42-7.31 (m, 2H), 7.29-7.15 (m, 3H), 7.08 (d, *J* = 8.0 Hz, 1H), 7.06-6.83 (m, 3H), 6.41 (s, 1H), 2.23 (s, 3H). **<sup>13</sup>C NMR (100 MHz, DMSO-*d*<sub>6</sub>)** δ 156.6, 152.7, 152.3, 141.9, 138.5, 137.3, 130.3, 129.3, 129.1, 128.9, 128.0, 127.5, 127.4, 127.1, 127.0, 125.8, 125.2, 124.5, 124.1, 123.2, 122.0, 119.8, 114.5, 112.8, 103.4, 60.0, 21.4. **HRMS (ESI-TOF) *m/z*** calcd. for C<sub>27</sub>H<sub>21</sub>N<sub>2</sub>O<sub>2</sub><sup>+</sup> [M+H]<sup>+</sup>: 405.1598; found: 405.1598.

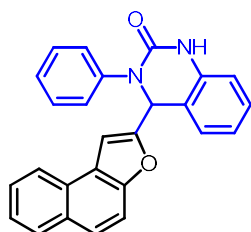

#### 4-(Naphtho[2,1-*b*]furan-2-yl)-3-phenyl-3,4-dihydroquinazolin-2(1*H*)-one (3g)

The title compound was obtained as a white solid (146.3 mg, 75%). Mp: 265.7-266.9 °C

**<sup>1</sup>H NMR (400 MHz, DMSO-*d*<sub>6</sub>)** δ 9.92 (s, 1H), 8.23 (d, *J* = 8.0 Hz, 1H), 8.00 (d, *J* = 8.4 Hz, 1H), 7.80 (d, *J* = 8.8 Hz, 1H), 7.74 (d, *J* = 9.2 Hz, 1H), 7.58 (t, *J* = 7.6 Hz, 1H), 7.50 (t, *J* = 7.6 Hz, 1H), 7.42-7.28 (m, 6H), 7.28-7.16 (m, 2H), 7.02-6.90 (m, 2H), 6.44 (s, 1H). **<sup>13</sup>C NMR (100 MHz, CDCl<sub>3</sub>)** δ 155.0, 153.5, 152.6, 141.2, 136.1, 130.2, 129.13, 129.10, 128.7, 127.5, 126.9, 126.8, 126.4, 126.3, 125.4, 124.6, 123.3, 123.1, 122.5, 119.4, 114.4, 112.4, 103.0, 61.0. **HRMS (ESI-TOF) *m/z*** calcd. for C<sub>26</sub>H<sub>19</sub>N<sub>2</sub>O<sub>2</sub><sup>+</sup> [M+H]<sup>+</sup>: 391.1441; found: 391.1442.

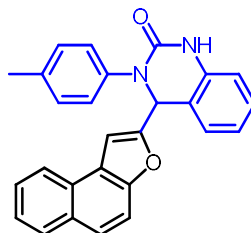

#### 4-(Naphtho[2,1-*b*]furan-2-yl)-3-(*p*-tolyl)-3,4-dihydroquinazolin-2(1*H*)-one (3h)

The title compound was obtained as a white solid (177.8 mg, 88%). Mp: 153.0-154.5 °C.

**<sup>1</sup>H NMR (400 MHz, DMSO-*d*<sub>6</sub>)** δ 9.87 (s, 1H), 8.22 (d, *J* = 8.0 Hz, 1H), 8.00 (d, *J* = 8.0 Hz, 1H), 7.79 (d, *J* = 9.2 Hz, 1H), 7.74 (d, *J* = 8.8 Hz, 1H), 7.58 (t, *J* = 7.0 Hz, 1H), 7.53-7.45 (m, 1H), 7.34 (s, 1H), 7.30 (d, *J* = 7.6 Hz, 1H), 7.24 (t, *J* = 7.6 Hz, 1H), 7.18 (d, *J* = 8.4 Hz, 2H), 7.11 (d, *J* = 8.4 Hz, 2H), 6.99-6.90 (m, 2H), 6.37 (s, 1H), 2.24 (s, 3H). **<sup>13</sup>C NMR (100 MHz, DMSO-*d*<sub>6</sub>)** δ 156.6, 152.7, 152.3, 139.4, 137.3, 136.0, 130.4, 129.6, 129.2, 129.1, 127.5,

127.1, 127.0, 125.8, 125.2, 124.1, 123.2, 121.9, 119.6, 114.5, 112.8, 103.5, 60.2, 21.0. **HRMS** (ESI-TOF)  $m/z$  calcd. for  $C_{27}H_{21}N_2O_2^+$   $[M+H]^+$ : 405.1598; found: 405.1593.

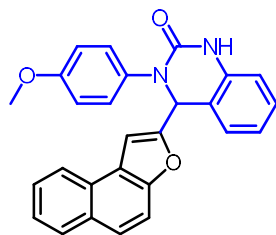

### 3-(4-Methoxyphenyl)-4-(naphtho[2,1-*b*]furan-2-yl)-3,4-dihydroquinazolin-2(1*H*)-one (3i)

The title compound was obtained as a white solid (172.4 mg, 82%). Mp: 167.3-168.6 °C.

**$^1H$  NMR (400 MHz, DMSO- $d_6$ )**  $\delta$  9.84 (s, 1H), 8.22 (d,  $J$  = 8.0 Hz, 1H), 8.00 (d,  $J$  = 8.0 Hz, 1H), 7.79 (d,  $J$  = 9.2 Hz, 1H), 7.74 (d,  $J$  = 9.2 Hz, 1H), 7.58 (t,  $J$  = 7.6 Hz, 1H), 7.49 (t,  $J$  = 7.4 Hz, 1H), 7.36 (s, 1H), 7.30-7.21 (m, 2H), 7.18 (d,  $J$  = 8.8 Hz, 2H), 7.01-6.90 (m, 2H), 6.86 (d,  $J$  = 8.8 Hz, 2H), 6.33 (s, 1H), 3.69 (s, 3H).  **$^{13}C$  NMR (100 MHz, DMSO- $d_6$ )**  $\delta$  158.0, 156.7, 152.8, 152.3, 137.4, 134.6, 130.4, 129.2, 129.1, 127.5, 127.2, 127.0, 125.8, 125.2, 124.1, 123.2, 121.9, 119.6, 114.5, 114.4, 112.8, 103.6, 60.5, 55.6. **HRMS** (ESI-TOF)  $m/z$  calcd. for  $C_{27}H_{21}N_2O_3^+$   $[M+H]^+$ : 421.1547; found: 421.1545.

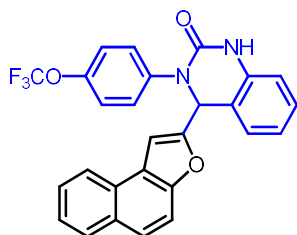

### 4-(Naphtho[2,1-*b*]furan-2-yl)-3-(4-(trifluoromethoxy)phenyl)-3,4-dihydroquinazolin-2(1*H*)-one (3j)

The title compound was obtained as a white solid (201.5 mg, 85%). Mp: 163.8-165.2 °C.

**$^1H$  NMR (400 MHz, DMSO- $d_6$ )**  $\delta$  10.10 (s, 1H), 8.24 (d,  $J$  = 8.4 Hz, 1H), 8.00 (d,  $J$  = 8.0 Hz, 1H), 7.80 (d,  $J$  = 8.8 Hz, 1H), 7.75 (d,  $J$  = 9.2 Hz, 1H), 7.58 (t,  $J$  = 6.8 Hz, 1H), 7.54-7.43 (m, 3H), 7.43-7.32 (m, 4H), 7.28 (t,  $J$  = 7.6 Hz, 1H), 7.09-6.95 (m, 2H), 6.53 (s, 1H).  **$^{13}C$  NMR (100 MHz, DMSO- $d_6$ )**  $\delta$  156.2, 152.6, 152.4, 146.4, 141.0, 137.1, 130.4, 129.4, 129.10, 129.05, 127.5, 127.2, 127.0, 125.9, 125.3, 124.1, 123.2, 122.2, 121.9, 120.5 (q,  $d$  = 253.7 Hz), 119.7, 114.6, 112.8, 103.6, 59.7.  **$^{19}F$  NMR (377 MHz, DMSO- $d_6$ )**  $\delta$  -56.95 (s, 3F). **HRMS** (ESI-TOF)  $m/z$  calcd. for  $C_{27}H_{18}F_3N_2O_3^+$   $[M+H]^+$ : 475.1264; found: 475.1260.

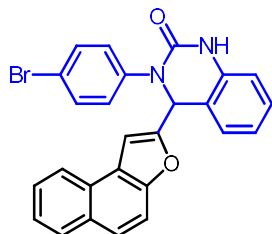

### 3-(4-Bromophenyl)-4-(naphtho[2,1-*b*]furan-2-yl)-3,4-dihydroquinazolin-2(1*H*)-one (3k)

The title compound was obtained as a white solid (172.6 mg, 75%). Mp: 160.9-162.8 °C.

**$^1H$  NMR (400 MHz, DMSO- $d_6$ )**  $\delta$  10.03 (s, 1H), 8.23 (d,  $J$  = 8.0 Hz, 1H), 8.00 (d,  $J$  = 8.0 Hz, 1H), 7.79 (d,  $J$  = 9.2 Hz, 1H), 7.74 (d,  $J$  = 8.8 Hz, 1H), 7.62-7.46 (m, 4H), 7.40-7.20 (m, 5H), 6.97 (t,  $J$  = 8.4 Hz, 2H), 6.48 (s, 1H).  **$^{13}C$  NMR (100 MHz, DMSO- $d_6$ )**  $\delta$  156.1, 152.4, 141.2,

137.1, 132.1, 130.3, 129.5, 129.1, 127.5, 127.2, 127.0, 125.9, 125.3, 124.1, 123.2, 122.2, 119.6, 119.2, 114.6, 112.8, 103.7, 59.7. **HRMS** (ESI-TOF)  $m/z$  calcd. for  $C_{26}H_{18}BrN_2O_2^+$   $[M+H]^+$ : 469.0546; found: 469.0550.

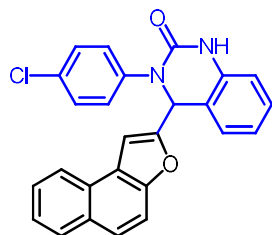

### 3-(4-Chlorophenyl)-4-(naphtho[2,1-*b*]furan-2-yl)-3,4-dihydroquinazolin-2(1*H*)-one (3l)

The title compound was obtained as a white solid (184.4 mg, 87%). Mp: 197.2-198.8 °C.

**<sup>1</sup>H NMR** (400 MHz, DMSO-*d*<sub>6</sub>) δ 10.01 (s, 1H), 8.23 (d,  $J$  = 8.0 Hz, 1H), 8.00 (d,  $J$  = 8.0 Hz, 1H), 7.79 (d,  $J$  = 9.2 Hz, 1H), 7.74 (d,  $J$  = 8.8 Hz, 1H), 7.58 (t,  $J$  = 8.2 Hz, 1H), 7.53-7.46 (m, 1H), 7.46-7.34 (m, 5H), 7.32 (d,  $J$  = 7.6 Hz, 1H), 7.26 (t,  $J$  = 7.8 Hz, 1H), 7.05-6.91 (m, 2H), 6.47 (s, 1H). **<sup>13</sup>C NMR** (100 MHz, DMSO-*d*<sub>6</sub>) δ 156.1, 152.5, 152.3, 140.8, 137.1, 130.9, 130.4, 129.3, 129.2, 129.12, 129.07, 127.5, 127.2, 127.0, 125.9, 125.3, 124.1, 123.2, 122.1, 119.6, 114.6, 112.8, 103.7, 59.8. **HRMS** (ESI-TOF)  $m/z$  calcd. for  $C_{26}H_{18}ClN_2O_2^+$   $[M+H]^+$ : 425.1051; found: 425.1052.

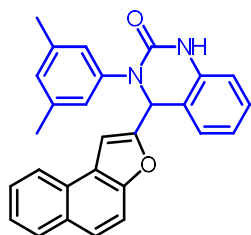

### 3-(3,5-Dimethylphenyl)-4-(naphtho[2,1-*b*]furan-2-yl)-3,4-dihydroquinazolin-2(1*H*)-one (3m)

The title compound was obtained as a white solid (154.8 mg, 74%). Mp: 303.6-305.1 °C.

**<sup>1</sup>H NMR** (400 MHz, DMSO-*d*<sub>6</sub>) δ 9.90 (s, 1H), 8.23 (d,  $J$  = 8.0 Hz, 1H), 7.99 (d,  $J$  = 8.4 Hz, 1H), 7.79 (d,  $J$  = 9.2 Hz, 1H), 7.74 (d,  $J$  = 9.2 Hz, 1H), 7.58 (t,  $J$  = 7.6 Hz, 1H), 7.49 (t,  $J$  = 7.4 Hz, 1H), 7.42-7.31 (m, 2H), 7.25 (t,  $J$  = 7.6 Hz, 1H), 7.07-6.88 (m, 4H), 6.83 (s, 1H), 6.39 (s, 1H), 2.18 (s, 6H). **<sup>13</sup>C NMR** (100 MHz, DMSO-*d*<sub>6</sub>) δ 156.6, 152.7, 152.3, 141.9, 138.1, 137.4, 130.3, 129.2, 129.1, 128.2, 127.5, 127.1, 127.0, 125.8, 125.2, 125.1, 124.1, 123.2, 122.0, 119.8, 114.5, 112.8, 103.3, 60.0, 21.3. **HRMS** (ESI-TOF)  $m/z$  calcd. for  $C_{28}H_{23}N_2O_2^+$   $[M+H]^+$ : 419.1754; found: 419.1758.

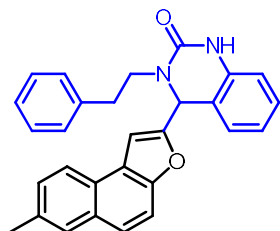

### 4-(7-Methylnaphtho[2,1-*b*]furan-2-yl)-3-phenethyl-3,4-dihydroquinazolin-2(1*H*)-one (3n)

The title compound was obtained as a white solid (140.4 mg, 65%). Mp: 172.4-173.7 °C.

**<sup>1</sup>H NMR (400 MHz, DMSO-*d*<sub>6</sub>)** δ 9.61 (s, 1H), 8.17 (d, *J* = 8.0 Hz, 1H), 7.76 (s, 1H), 7.72-7.63 (m, 2H), 7.44 (d, *J* = 8.4 Hz, 1H), 7.39 (s, 1H), 7.28-7.15 (m, 7H), 6.96-6.88 (m, 2H), 6.03 (s, 1H), 4.11-3.96 (m, 1H), 3.33-3.16 (m, 1H), 3.03-2.91 (m, 1H), 2.79-2.67 (m, 1H), 2.47 (s, 3H). **<sup>13</sup>C NMR (100 MHz, DMSO-*d*<sub>6</sub>)** δ 156.6, 153.2, 152.1, 139.6, 137.6, 134.3, 130.6, 129.1, 129.0, 128.8, 128.1, 127.0, 126.6, 125.6, 125.2, 124.0, 123.1, 121.7, 118.9, 114.3, 112.7, 103.5, 56.8, 47.5, 34.0, 21.6. **HRMS (ESI-TOF)** *m/z* calcd. for C<sub>29</sub>H<sub>25</sub>N<sub>2</sub>O<sub>2</sub><sup>+</sup> [M+H]<sup>+</sup>: 433.1911; found: 433.1916.

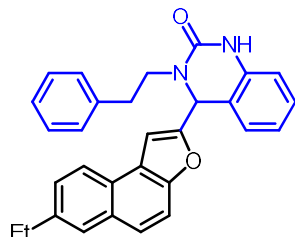

**4-(7-Ethylnaphtho[2,1-*b*]furan-2-yl)-3-phenethyl-3,4-dihydroquinazolin-2(1*H*)-one (3o)**

The title compound was obtained as a yellow solid (160.8 mg, 72%). Mp: 175.2-176.9 °C.

**<sup>1</sup>H NMR (400 MHz, DMSO-*d*<sub>6</sub>)** δ 9.64 (s, 1H), 8.19 (d, *J* = 8.4 Hz, 1H), 7.78 (s, 1H), 7.74-7.65 (m, 2H), 7.48 (d, *J* = 8.4 Hz, 1H), 7.41 (s, 1H), 7.30-7.14 (m, 7H), 6.97-6.88 (m, 2H), 6.05 (s, 1H), 4.12-3.96 (m, 1H), 3.35-3.19 (m, 1H), 3.04-2.90 (m, 1H), 2.79-2.69 (m, 3H), 1.27 (t, *J* = 7.6 Hz, 3H). **<sup>13</sup>C NMR (100 MHz, DMSO-*d*<sub>6</sub>)** δ 156.5, 153.3, 152.1, 140.6, 139.6, 137.6, 130.6, 129.1, 128.8, 127.9, 127.0, 126.8, 126.6, 125.9, 125.4, 124.1, 123.1, 121.7, 118.9, 114.3, 112.7, 103.5, 56.8, 47.5, 34.0, 28.7, 16.0. **HRMS (ESI-TOF)** *m/z* calcd. for C<sub>30</sub>H<sub>27</sub>N<sub>2</sub>O<sub>2</sub><sup>+</sup> [M+H]<sup>+</sup>: 447.2067; found: 447.2063.

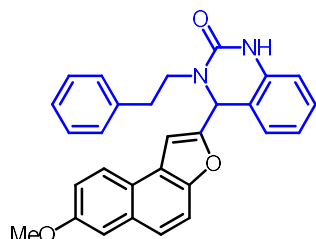

**4-(7-Methoxynaphtho[2,1-*b*]furan-2-yl)-3-phenethyl-3,4-dihydroquinazolin-2(1*H*)-one (3p)**

The title compound was obtained as a white solid (159.0 mg, 71%). Mp: 198.0-199.8 °C.

**<sup>1</sup>H NMR (400 MHz, DMSO-*d*<sub>6</sub>)** δ 9.62 (s, 1H), 8.19 (d, *J* = 8.8 Hz, 1H), 7.75-7.64 (m, 2H), 7.49-7.43 (m, 1H), 7.39 (s, 1H), 7.35-7.13 (m, 8H), 6.97-6.87 (m, 2H), 6.03 (s, 1H), 4.09-3.97 (m, 1H), 3.88 (s, 3H), 3.30-3.19 (m, 1H), 3.02-2.91 (m, 1H), 2.79-2.67 (m, 1H). **<sup>13</sup>C NMR (100 MHz, DMSO-*d*<sub>6</sub>)** δ 156.9, 156.6, 153.2, 151.3, 139.6, 137.6, 131.7, 129.1, 128.8, 127.1, 126.6, 125.6, 124.8, 123.4, 122.4, 121.7, 118.9, 118.8, 114.3, 113.0, 108.1, 103.4, 56.8, 55.6, 47.4, 34.0. **HRMS (ESI-TOF)** *m/z* calcd. for C<sub>29</sub>H<sub>25</sub>N<sub>2</sub>O<sub>3</sub><sup>+</sup> [M+H]<sup>+</sup>: 449.1860; found: 449.1854.



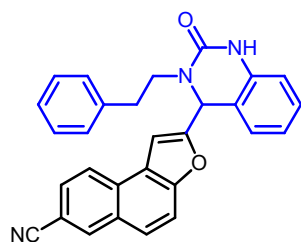

**2-(2-Oxo-3-phenethyl-1,2,3,4-tetrahydroquinazolin-4-yl)naphtho[2,1-*b*]furan-7-carbonitrile (3q)**

The title compound was obtained as a yellow solid (155.1 mg, 70%). Mp: 126.2-127.9 °C.

**<sup>1</sup>H NMR (400 MHz, DMSO-*d*<sub>6</sub>)** δ 9.61 (s, 1H), 8.66 (s, 1H), 8.49 (d, *J* = 8.4 Hz, 1H), 7.98-7.86 (m, 3H), 7.55 (s, 1H), 7.32-7.10 (m, 7H), 6.96-6.88 (m, 2H), 6.09 (s, 1H), 4.10-3.98 (m, 1H), 3.30-3.19 (m, 1H), 3.02-2.91 (m, 1H), 2.80-2.68 (m, 1H). **<sup>13</sup>C NMR (100 MHz, DMSO-*d*<sub>6</sub>)** δ 157.7, 153.8, 153.2, 139.5, 137.6, 135.3, 129.5, 129.4, 129.2, 129.1, 128.8, 127.6, 127.1, 126.6, 126.3, 125.8, 123.5, 121.8, 119.7, 118.6, 114.7, 114.3, 107.6, 103.7, 56.8, 47.5, 34.1. **HRMS (ESI-TOF)** *m/z* calcd. for C<sub>29</sub>H<sub>22</sub>N<sub>3</sub>O<sub>2</sub><sup>+</sup> [M+H]<sup>+</sup>: 444.1707; found: 444.1710.

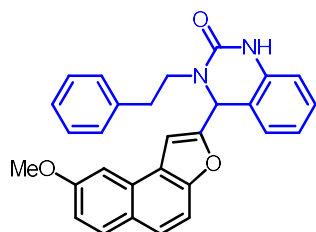

**4-(8-Methoxynaphtho[2,1-*b*]furan-2-yl)-3-phenethyl-3,4-dihydroquinazolin-2(1H)-one (3r)**

The title compound was obtained as a yellow solid (179.4 mg, 80%). Mp: 204.1-205.2 °C.

**<sup>1</sup>H NMR (400 MHz, DMSO-*d*<sub>6</sub>)** δ 9.60 (s, 1H), 7.89 (d, *J* = 9.2 Hz, 1H), 7.76-7.65 (m, 2H), 7.54 (d, *J* = 8.8 Hz, 1H), 7.45 (s, 1H), 7.31-7.15 (m, 7H), 7.13 (dd, *J* = 8.8, 2.4 Hz, 1H), 6.96-6.88 (m, 2H), 6.02 (s, 1H), 4.12-4.01 (m, 1H), 3.95 (s, 3H), 3.33-3.20 (m, 1H), 3.03-2.90 (m, 1H), 2.82-2.69 (m, 1H). **<sup>13</sup>C NMR (100 MHz, DMSO-*d*<sub>6</sub>)** δ 158.5, 156.1, 153.3, 152.9, 139.6, 137.6, 130.6, 129.10, 129.08, 128.8, 127.0, 126.6, 125.6, 125.3, 122.7, 121.7, 119.0, 117.2, 114.3, 110.1, 103.6, 103.5, 56.9, 55.9, 47.6, 34.1. **HRMS (ESI-TOF)** *m/z* calcd. for C<sub>29</sub>H<sub>25</sub>N<sub>2</sub>O<sub>3</sub><sup>+</sup> [M+H]<sup>+</sup>: 449.1860; found: 449.1864.

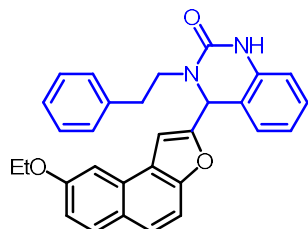

**4-(8-Ethoxynaphtho[2,1-*b*]furan-2-yl)-3-phenethyl-3,4-dihydroquinazolin-2(1H)-one (3s)**

The title compound was obtained as a yellow solid (194.3 mg, 84%). Mp: 182.0-183.5 °C.

**<sup>1</sup>H NMR (400 MHz, DMSO-*d*<sub>6</sub>)** δ 9.59 (s, 1H), 7.88 (d, *J* = 8.8 Hz, 1H), 7.74-7.64 (m, 2H), 7.53 (d, *J* = 8.8 Hz, 1H), 7.44 (s, 1H), 7.31-7.14 (m, 7H), 7.11 (dd, *J* = 8.8, 2.4 Hz, 1H), 6.98-6.86 (m, 2H), 6.01 (s, 1H), 4.22 (q, *J* = 7.2 Hz, 2H), 4.14-3.97 (m, 1H), 3.32-3.20 (m, 1H), 3.04-2.89 (m, 1H), 2.82-2.69 (m, 1H), 1.41 (t, *J* = 7.0 Hz, 3H). **<sup>13</sup>C NMR (100 MHz,**

**DMSO-d<sub>6</sub>**)  $\delta$  157.8, 156.0, 153.3, 152.9, 139.6, 137.6, 130.6, 129.1, 128.8, 127.0, 126.6, 125.6, 125.2, 122.7, 121.7, 119.0, 117.3, 114.3, 110.0, 104.1, 103.6, 63.8, 56.9, 47.6, 34.1, 15.1. **HRMS** (ESI-TOF)  $m/z$  calcd. for C<sub>30</sub>H<sub>27</sub>N<sub>2</sub>O<sub>3</sub><sup>+</sup> [M+H]<sup>+</sup>: 463.2016; found: 463.2025.

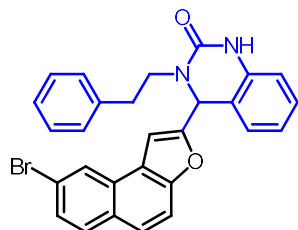

**4-(8-bromonaphtho[2,1-b]furan-2-yl)-3-phenethyl-3,4-dihydroquinazolin-2(1H)-one (3t)**

The title compound was obtained as a yellow solid (194.0 mg, 78%). Mp: 205.9-207.1 °C.

**<sup>1</sup>H NMR (400 MHz, DMSO-d<sub>6</sub>)**  $\delta$  9.59 (s, 1H), 8.62 (s, 1H), 7.97 (d,  $J$  = 8.8 Hz, 1H), 7.81 (d,  $J$  = 8.8 Hz, 1H), 7.77 (d,  $J$  = 8.8 Hz, 1H), 7.62 (d,  $J$  = 8.4 Hz, 1H), 7.55 (s, 1H), 7.33-7.11 (m, 7H), 6.99-6.84 (m, 2H), 6.04 (s, 1H), 4.11-3.95 (m, 1H), 3.30-3.19 (m, 1H), 3.01-2.90 (m, 1H), 2.81-2.68 (m, 1H). **<sup>13</sup>C NMR (100 MHz, DMSO-d<sub>6</sub>)**  $\delta$  157.0, 153.2, 152.8, 139.5, 137.6, 131.3, 129.14, 129.10, 128.92, 128.86, 128.8, 128.2, 127.0, 126.6, 126.5, 125.7, 122.7, 121.7, 120.6, 118.8, 114.3, 113.4, 103.7, 56.8, 47.6, 34.1. **HRMS** (ESI-TOF)  $m/z$  calcd. for C<sub>28</sub>H<sub>22</sub>BrN<sub>2</sub>O<sub>2</sub><sup>+</sup> [M+H]<sup>+</sup>: 497.0859; found: 497.0855.

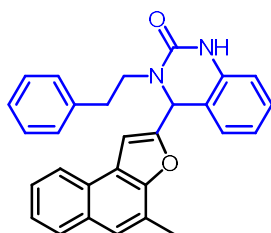

**4-(4-Methylnaphtho[2,1-b]furan-2-yl)-3-phenethyl-3,4-dihydroquinazolin-2(1H)-one (3u)**

The title compound was obtained as a yellow solid (157.7 mg, 73%). Mp: 207.1-208.4 °C.

**<sup>1</sup>H NMR (400 MHz, DMSO-d<sub>6</sub>)**  $\delta$  9.61 (s, 1H), 8.19 (d,  $J$  = 8.0 Hz, 1H), 7.89 (d,  $J$  = 8.0 Hz, 1H), 7.57 (s, 1H), 7.51 (t,  $J$  = 7.4 Hz, 1H), 7.45 (t,  $J$  = 7.4 Hz, 1H), 7.31 (s, 1H), 7.29-7.13 (m, 7H), 6.93 (t,  $J$  = 8.0 Hz, 2H), 6.05 (s, 1H), 4.16-4.02 (m, 1H), 3.35-3.21 (m, 1H), 3.04-2.93 (m, 1H), 2.85-2.72 (m, 1H), 2.52 (s, 3H). **<sup>13</sup>C NMR (100 MHz, DMSO-d<sub>6</sub>)**  $\delta$  156.6, 153.4, 152.1, 139.6, 137.7, 130.8, 129.1, 128.9, 128.8, 128.3, 127.0, 126.6, 126.4, 126.0, 125.2, 124.9, 123.9, 122.7, 122.3, 121.7, 119.1, 114.3, 103.5, 56.8, 47.6, 34.1, 15.5. **HRMS** (ESI-TOF)  $m/z$  calcd. for C<sub>29</sub>H<sub>25</sub>N<sub>2</sub>O<sub>2</sub><sup>+</sup> [M+H]<sup>+</sup>: 433.1911; found: 433.1906.

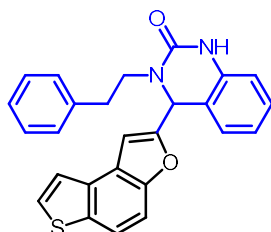

**3-Phenethyl-4-(thieno[3,2-e]benzofuran-2-yl)-3,4-dihydroquinazolin-2(1H)-one (3v)**

The title compound was obtained as a yellow solid (154.8 mg, 73%). Mp: 168.5-169.9 °C.

**<sup>1</sup>H NMR (400 MHz, DMSO-d<sub>6</sub>)**  $\delta$  9.58 (s, 1H), 7.93-7.76 (m, 3H), 7.57 (d,  $J$  = 8.8 Hz, 1H), 7.30-7.12 (m, 8H), 6.98-6.85 (m, 2H), 6.03 (s, 1H), 4.09-3.97 (m, 1H), 3.32-3.15 (m, 1H), 3.01-2.90 (m, 1H), 2.82-2.68 (m, 1H). **<sup>13</sup>C NMR (100 MHz, DMSO-d<sub>6</sub>)**  $\delta$  156.9, 153.2, 152.8,

139.5, 137.6, 134.9, 133.0, 129.2, 129.1, 128.9, 128.8, 127.0, 126.6, 122.6, 122.5, 121.7, 119.1, 118.8, 114.3, 109.3, 103.4, 56.7, 47.5, 34.1. **HRMS** (ESI-TOF)  $m/z$  calcd. for  $C_{26}H_{21}N_2O_2S^+$   $[M+H]^+$ : 425.1318; found: 425.1313.

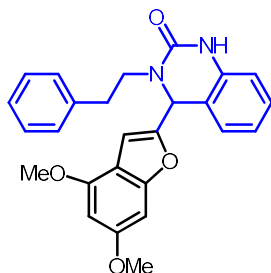

**4-(4,6-Dimethoxybenzofuran-2-yl)-3-phenethyl-3,4-dihydroquinazolin-2(1H)-one (3w)**

The title compound was obtained as a yellow solid (37.9 mg, 18%). Mp: 140.1-142.3 °C.

**$^1H$  NMR (400 MHz,  $CDCl_3$ )**  $\delta$  7.78 (s, 1H), 7.33-7.14 (m, 6H), 6.99 (d,  $J = 7.6$  Hz, 1H), 6.91 (t,  $J = 7.4$  Hz, 1H), 6.78 (d,  $J = 8.0$  Hz, 1H), 6.55 (s, 1H), 6.49 (s, 1H), 6.26 (s, 1H), 5.32 (s, 1H), 4.28-4.16 (m, 1H), 3.84 (s, 3H), 3.78 (s, 3H), 3.40-3.28 (m, 1H), 3.03-2.92 (m, 1H), 2.92-2.80 (m, 1H).  **$^{13}C$  NMR (100 MHz,  $CDCl_3$ )**  $\delta$  159.2, 156.9, 153.9, 153.4, 139.2, 136.4, 128.9, 128.8, 128.5, 126.5, 126.3, 121.9, 118.3, 114.0, 111.5, 101.3, 94.3, 88.3, 57.8, 55.7, 55.5, 48.1, 34.6. **HRMS** (ESI-TOF)  $m/z$  calcd. for  $C_{26}H_{25}N_2O_4^+$   $[M+H]^+$ : 429.1809; found: 429.1812.

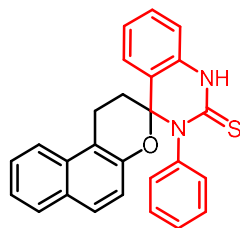

**3'-Phenyl-1,2-dihydro-1'H-spiro[benzo[f]chromene-3,4'-quinazoline]-2'(3'H)-thione (5a)**

The title compound was obtained as a yellow solid (143.0 mg, 70%). Mp: 222.9-224.4 °C.

**$^1H$  NMR (400 MHz,  $DMSO-d_6$ )**  $\delta$  11.62 (s, 1H), 7.80 (d,  $J = 8.0$  Hz, 1H), 7.75 (d,  $J = 8.4$  Hz, 1H), 7.65 (d,  $J = 8.8$  Hz, 1H), 7.48 (t,  $J = 7.6$  Hz, 1H), 7.44-7.33 (m, 3H), 7.33-7.21 (m, 5H), 7.18 (d,  $J = 7.6$  Hz, 1H), 7.03 (t,  $J = 7.6$  Hz, 1H), 6.88 (d,  $J = 8.8$  Hz, 1H), 2.90-2.71 (m, 2H), 2.64-2.53 (m, 1H), 2.50-2.38 (m, 1H).  **$^{13}C$  NMR (100 MHz,  $DMSO-d_6$ )**  $\delta$  176.1, 150.8, 140.5, 133.9, 132.1, 130.3, 129.2, 128.7, 128.6, 128.5, 128.2, 127.1, 124.8, 124.2, 123.6, 123.4, 122.7, 118.3, 114.9, 114.0, 88.6, 30.7, 18.4. **HRMS** (ESI-TOF)  $m/z$  calcd. for  $C_{26}H_{21}N_2OS^+$   $[M+H]^+$ : 409.1369; found: 409.1366.

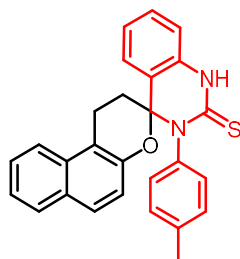

**3'-(p-Tolyl)-1,2-dihydro-1'H-spiro[benzo[f]chromene-3,4'-quinazoline]-2'(3'H)-thione (5b)**

The title compound was obtained as a yellow solid (166.9 mg, 79%). Mp: 207.8-209.9 °C.

**<sup>1</sup>H NMR (400 MHz, DMSO-*d*<sub>6</sub>)** δ 11.57 (s, 1H), 7.86-7.74 (m, 2H), 7.67 (d, *J* = 9.2 Hz, 1H), 7.49 (t, *J* = 7.4 Hz, 2H), 7.43-7.33 (m, 2H), 7.27 (d, *J* = 7.6 Hz, 2H), 7.19-7.07 (m, 4H), 7.02 (t, *J* = 7.2 Hz, 1H), 6.90 (d, *J* = 8.8 Hz, 1H), 2.94-2.72 (m, 2H), 2.66-2.54 (m, 1H), 2.49-2.41 (m, 1H), 2.25 (s, 3H). **<sup>13</sup>C NMR (100 MHz, DMSO-*d*<sub>6</sub>)** δ 176.2, 150.9, 137.8, 137.5, 133.8, 132.1, 130.3, 129.9, 129.2, 129.1, 128.7, 128.6, 127.2, 124.9, 124.2, 123.6, 123.3, 122.7, 118.4, 114.8, 113.9, 88.6, 30.5, 21.1, 18.5. **HRMS (ESI-TOF)** *m/z* calcd. for C<sub>27</sub>H<sub>23</sub>N<sub>2</sub>OS<sup>+</sup> [M+H]<sup>+</sup>: 423.1526; found: 423.1530.

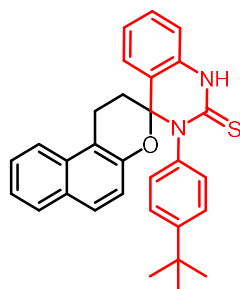

**3'-(4-*tert*-Butylphenyl)-1,2-dihydro-1'*H*-spiro[benzo[*f*]chromene-3,4'-quinazoline]-2'(3'*H*)-thione (5c)**

The title compound was obtained as a yellow solid (199.8 mg, 86%). Mp: 223.4-224.8 °C.

**<sup>1</sup>H NMR (400 MHz, DMSO-*d*<sub>6</sub>)** δ 11.59 (s, 1H), 7.79 (d, *J* = 8.0 Hz, 1H), 7.71 (d, *J* = 8.4 Hz, 1H), 7.64 (d, *J* = 8.8 Hz, 1H), 7.47 (t, *J* = 7.6 Hz, 1H), 7.43-7.32 (m, 2H), 7.32-7.16 (m, 5H), 7.04 (t, *J* = 7.8 Hz, 2H), 6.87 (d, *J* = 8.8 Hz, 1H), 2.92-2.64 (m, 2H), 2.63-2.54 (m, 1H), 2.49-2.34 (m, 1H), 1.19 (s, 9H). **<sup>13</sup>C NMR (100 MHz, DMSO-*d*<sub>6</sub>)** δ 176.1, 150.8, 150.4, 137.9, 134.0, 132.1, 131.4, 130.3, 129.2, 128.7, 128.5, 127.1, 125.1, 124.9, 124.2, 123.6, 123.4, 122.6, 118.4, 114.8, 114.0, 88.4, 34.7, 31.5, 30.6, 18.5. **HRMS (ESI-TOF)** *m/z* calcd. for C<sub>30</sub>H<sub>29</sub>N<sub>2</sub>OS<sup>+</sup> [M+H]<sup>+</sup>: 465.1995; found: 465.1990.

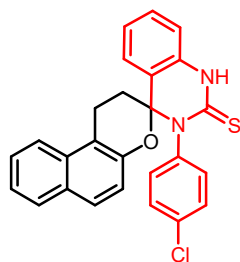

**3'-(4-Chlorophenyl)-1,2-dihydro-1'*H*-spiro[benzo[*f*]chromene-3,4'-quinazoline]-2'(3'*H*)-thione (5d)**

The title compound was obtained as a yellow solid (168.3 mg, 76%). Mp: 239.5-241.0 °C.

**<sup>1</sup>H NMR (400 MHz, DMSO-*d*<sub>6</sub>)** δ 11.68 (s, 1H), 7.81 (t, *J* = 8.2 Hz, 2H), 7.68 (d, *J* = 8.8 Hz, 1H), 7.50 (t, *J* = 7.0 Hz, 1H), 7.45-7.33 (m, 5H), 7.27 (d, *J* = 8.0 Hz, 2H), 7.16 (d, *J* = 8.0 Hz, 1H), 7.04 (t, *J* = 7.6 Hz, 1H), 6.91 (d, *J* = 8.8 Hz, 1H), 2.98-2.88 (m, 1H), 2.87-2.76 (m, 1H), 2.62-2.53 (m, 1H), 2.49-2.38 (m, 1H). **<sup>13</sup>C NMR (100 MHz, DMSO-*d*<sub>6</sub>)** δ 176.0, 150.8, 139.3, 133.7, 132.9, 132.1, 130.4, 129.3, 128.7, 128.6, 127.2, 124.9, 124.3, 123.8, 123.3, 122.7, 118.2, 114.9, 114.0, 88.8, 30.7, 18.4. **HRMS (ESI-TOF)** *m/z* calcd. for C<sub>26</sub>H<sub>20</sub>ClN<sub>2</sub>OS<sup>+</sup> [M+H]<sup>+</sup>: 443.0979; found: 443.0982.

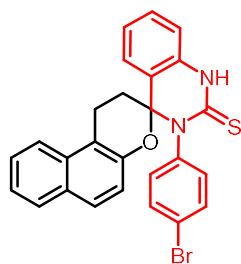

**3'-(4-Bromophenyl)-1,2-dihydro-1'H-spiro[benzo[f]chromene-3,4'-quinazoline]-2'(3'H)-thione (5e)**

The title compound was obtained as a yellow solid (165.7 mg, 68%). Mp: 246.3-247.6 °C.

<sup>1</sup>H NMR (400 MHz, DMSO-d<sub>6</sub>) δ 11.70 (s, 1H), 7.90-7.73 (m, 2H), 7.67 (d, *J* = 8.4 Hz, 1H), 7.57-7.45 (m, 3H), 7.45-7.17 (m, 5H), 7.17-7.10 (m, 1H), 7.07-6.98 (m, 1H), 6.90 (d, *J* = 8.8 Hz, 1H), 3.09-2.67 (m, 2H), 2.60-2.49 (m, 1H), 2.49-2.30 (m, 1H). <sup>13</sup>C NMR (100 MHz, DMSO-d<sub>6</sub>) δ 175.9, 150.8, 139.7, 133.7, 132.4, 132.1, 131.5, 131.3, 130.4, 129.3, 128.7, 127.2, 124.8, 124.3, 123.8, 123.3, 122.7, 121.5, 118.2, 114.9, 114.0, 88.7, 30.7, 18.4. HRMS (ESI-TOF) *m/z* calcd. for C<sub>26</sub>H<sub>20</sub>BrN<sub>2</sub>OS<sup>+</sup> [M+H]<sup>+</sup>: 487.0474; found: 487.0468.

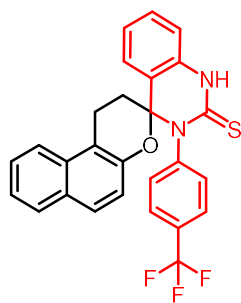

**3'-(4-(Trifluoromethyl)phenyl)-1,2-dihydro-1'H-spiro[benzo[f]chromene-3,4'-quinazolinone]-2'(3'H)-thione (5f)**

The title compound was obtained as a yellow solid (149.9 mg, 63%). Mp: 225.6-227.2 °C.

<sup>1</sup>H NMR (400 MHz, DMSO-d<sub>6</sub>) δ 11.75 (s, 1H), 7.87-7.75 (m, 2H), 7.75-7.53 (m, 5H), 7.52-7.47 (m, 1H), 7.45-7.35 (m, 2H), 7.30 (d, *J* = 7.6 Hz, 1H), 7.17 (d, *J* = 7.2 Hz, 1H), 7.11-7.00 (m, 1H), 6.89 (d, *J* = 8.4 Hz, 1H), 3.05-2.89 (m, 1H), 2.88-2.73 (m, 1H), 2.65-2.55 (m, 1H), 2.49-2.34 (m, 1H). <sup>13</sup>C NMR (100 MHz, DMSO-d<sub>6</sub>) δ 175.8, 150.7, 144.1, 133.7, 133.3, 132.1, 130.5, 129.3, 128.7, 127.2, 125.6, 124.8, 124.4, 123.9, 123.3, 122.7, 118.1, 115.0, 114.0, 88.9, 30.7, 18.4. <sup>19</sup>F NMR (377 MHz, DMSO-d<sub>6</sub>) δ -60.96 (s, 3F). HRMS (ESI-TOF) *m/z* calcd. for C<sub>27</sub>H<sub>20</sub>F<sub>3</sub>N<sub>2</sub>OS<sup>+</sup> [M+H]<sup>+</sup>: 477.1243; found: 477.1240.

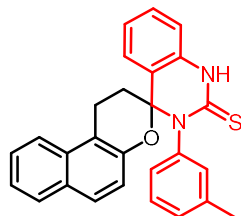

**3'-(*m*-Tolyl)-1,2-dihydro-1'H-spiro[benzo[f]chromene-3,4'-quinazolinone]-2'(3'H)-thione (5g)**

The title compound was obtained as a yellow solid (143.7 mg, 68%). Mp: 227.9-229.6 °C.

**<sup>1</sup>H NMR (400 MHz, DMSO-*d*<sub>6</sub>)** δ 11.59 (s, 1H), 7.88-7.62 (m, 3H), 7.53-7.33 (m, 3H), 7.32-6.84 (m, 8H), 2.91-2.49 (m, 4H), 2.32-1.96 (m, 3H). **<sup>13</sup>C NMR (100 MHz, DMSO-*d*<sub>6</sub>)** δ 176.1, 150.8, 140.4, 137.7, 134.0, 132.6, 132.1, 130.3, 129.2, 128.9, 128.8, 128.7, 128.6, 128.3, 128.0, 127.1, 124.8, 124.2, 123.6, 123.4, 122.6, 118.4, 114.9, 88.3, 30.4, 21.1, 18.5. **HRMS (ESI-TOF)** *m/z* calcd. for C<sub>27</sub>H<sub>23</sub>N<sub>2</sub>OS<sup>+</sup> [M+H]<sup>+</sup>: 423.1526; found: 423.1520.

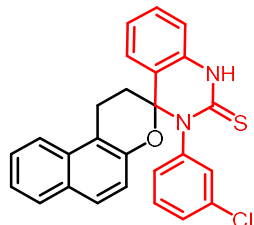

**3'-(3-Chlorophenyl)-1,2-dihydro-1'*H*-spiro[benzo[*f*]chromene-3,4'-quinazoline]-2'(3'*H*)-thione (5h)**

The title compound was obtained as a yellow solid (110.7 mg, 50%). Mp: 220.5-221.8 °C.

**<sup>1</sup>H NMR (400 MHz, DMSO-*d*<sub>6</sub>)** δ 11.72 (s, 1H), 7.87-7.74 (m, 2H), 7.69 (d, *J* = 9.2 Hz, 1H), 7.57-7.24 (m, 8H), 7.20 (d, *J* = 8.0 Hz, 1H), 7.05 (t, *J* = 7.6 Hz, 1H), 6.90 (d, *J* = 8.8 Hz, 1H), 3.02-2.76 (m, 2H), 2.67-2.55 (m, 1H), 2.50-2.35 (m, 1H). **<sup>13</sup>C NMR (100 MHz, DMSO-*d*<sub>6</sub>)** δ 176.0, 150.7, 141.7, 133.7, 132.5, 132.1, 131.0, 130.4, 130.0, 129.3, 128.7, 128.4, 127.2, 124.9, 124.3, 123.8, 123.4, 122.7, 118.1, 115.0, 114.0, 88.7, 30.7, 18.4. **HRMS (ESI-TOF)** *m/z* calcd. for C<sub>26</sub>H<sub>20</sub>ClN<sub>2</sub>OS<sup>+</sup> [M+H]<sup>+</sup>: 443.0979; found: 443.0980.

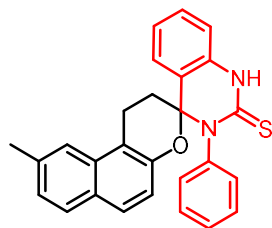

**9-Methyl-3'-phenyl-1,2-dihydro-1'*H*-spiro[benzo[*f*]chromene-3,4'-quinazoline]-2'(3'*H*)-thione (5i)**

The title compound was obtained as a yellow solid (179.4 mg, 85%). Mp: 236.4-237.8 °C.

**<sup>1</sup>H NMR (400 MHz, DMSO-*d*<sub>6</sub>)** δ 11.59 (s, 1H), 7.69 (d, *J* = 8.0 Hz, 1H), 7.58 (d, *J* = 8.4 Hz, 1H), 7.54 (s, 1H), 7.46-7.35 (m, 2H), 7.34-7.24 (m, 5H), 7.22-7.15 (m, 2H), 7.08-6.99 (m, 1H), 6.78 (d, *J* = 8.4 Hz, 1H), 2.87-2.75 (m, 2H), 2.61-2.53 (m, 1H), 2.49-2.34 (m, 4H). **<sup>13</sup>C NMR (100 MHz, DMSO-*d*<sub>6</sub>)** δ 176.1, 150.9, 140.5, 136.4, 133.9, 132.3, 132.1, 130.3, 128.6, 128.3, 128.2, 127.4, 126.3, 124.9, 123.6, 123.4, 121.8, 117.3, 114.8, 113.4, 88.6, 30.7, 22.1, 18.4. **HRMS (ESI-TOF)** *m/z* calcd. for C<sub>27</sub>H<sub>23</sub>N<sub>2</sub>OS<sup>+</sup> [M+H]<sup>+</sup>: 423.1526; found: 423.1530.

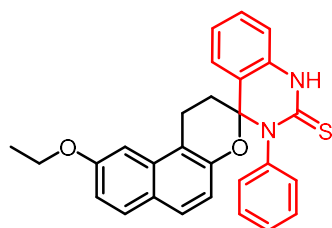

**9-Ethoxy-3'-phenyl-1,2-dihydro-1'*H*-spiro[benzo[*f*]chromene-3,4'-quinazoline]-2'(3'*H*)-thione (5j)**

The title compound was obtained as a yellow solid (147.1 mg, 65%). Mp: 260.9-262.6 °C.

**<sup>1</sup>H NMR (400 MHz, DMSO-*d*<sub>6</sub>)** δ 11.57 (s, 1H), 7.70 (d, *J* = 8.8 Hz, 1H), 7.55 (d, *J* = 8.8 Hz, 1H), 7.47-7.36 (m, 2H), 7.36-7.22 (m, 5H), 7.17 (d, *J* = 8.0 Hz, 1H), 7.10-6.95 (m, 3H), 6.69 (d, *J* = 8.8 Hz, 1H), 4.11 (q, *J* = 6.8 Hz, 2H), 2.85-2.71 (m, 2H), 2.60-2.53 (m, 1H), 2.49-2.38 (m, 1H), 1.36 (t, *J* = 7.0 Hz, 3H). **<sup>13</sup>C NMR (100 MHz, DMSO-*d*<sub>6</sub>)** δ 176.1, 157.8, 151.4, 140.4, 133.9, 133.5, 132.1, 130.3, 128.5, 128.3, 128.2, 124.8, 124.3, 123.6, 123.4, 116.3, 115.6, 114.8, 113.0, 102.8, 88.6, 63.5, 30.6, 18.5, 15.1. **HRMS (ESI-TOF)** *m/z* calcd. for C<sub>28</sub>H<sub>25</sub>N<sub>2</sub>O<sub>2</sub>S<sup>+</sup> [M+H]<sup>+</sup>: 453.1631; found: 453.1637.

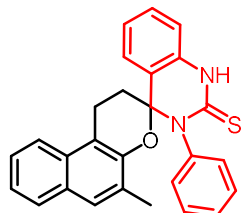

**5-Methyl-3'-phenyl-1,2-dihydro-1'*H*-spiro[benzo[*f*]chromene-3,4'-quinazoline]-2'(3'*H*)-thione (5k)**

The title compound was obtained as a yellow solid (162.5 mg, 77%). Mp: 225.9-227.3 °C.

**<sup>1</sup>H NMR (400 MHz, DMSO-*d*<sub>6</sub>)** δ 11.58 (s, 1H), 7.74 (d, *J* = 8.4 Hz, 1H), 7.70 (d, *J* = 8.0 Hz, 1H), 7.49 (s, 1H), 7.45-7.37 (m, 3H), 7.37-7.23 (m, 6H), 7.07-6.96 (m, 2H), 3.10-2.91 (m, 1H), 2.74-2.61 (m, 1H), 2.51-2.43 (m, 2H), 2.01 (s, 3H). **<sup>13</sup>C NMR (100 MHz, DMSO-*d*<sub>6</sub>)** δ 176.2, 150.1, 140.5, 133.9, 132.1, 131.7, 130.9, 130.3, 128.9, 128.6, 128.3, 127.9, 127.1, 126.2, 124.3, 123.8, 123.6, 122.5, 114.8, 113.5, 89.2, 30.2, 18.5, 16.9. **HRMS (ESI-TOF)** *m/z* calcd. for C<sub>27</sub>H<sub>23</sub>N<sub>2</sub>OS<sup>+</sup> [M+H]<sup>+</sup>: 423.1526; found: 423.1530.

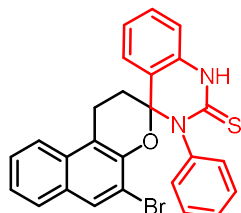

**5-Bromo-3'-phenyl-1,2-dihydro-1'*H*-spiro[benzo[*f*]chromene-3,4'-quinazoline]-2'(3'*H*)-thione (5l)**

The title compound was obtained as a yellow solid (124.3 mg, 51%). Mp: 218.2-220.0 °C.

**<sup>1</sup>H NMR (400 MHz, DMSO-*d*<sub>6</sub>)** δ 11.69 (s, 1H), 8.09 (s, 1H), 7.88-7.75 (m, 2H), 7.52 (t, *J* = 7.2 Hz, 1H), 7.47-7.37 (m, 3H), 7.36-7.22 (m, 5H), 7.15 (d, *J* = 7.6 Hz, 1H), 7.04 (t, *J* = 7.2 Hz, 1H), 3.03-2.79 (m, 2H), 2.67-2.52 (m, 2H). **<sup>13</sup>C NMR (100 MHz, DMSO-*d*<sub>6</sub>)** δ 176.2, 146.8, 140.3, 133.9, 132.2, 131.10, 131.08, 130.5, 129.8, 129.6, 128.5, 128.4, 128.0, 127.5, 125.3, 124.7, 123.8, 122.9, 116.4, 114.9, 112.1, 89.5, 30.7, 19.3. **HRMS (ESI-TOF)** *m/z* calcd. for C<sub>26</sub>H<sub>20</sub>BrN<sub>2</sub>OS<sup>+</sup> [M+H]<sup>+</sup>: 487.0474; found: 487.0480.

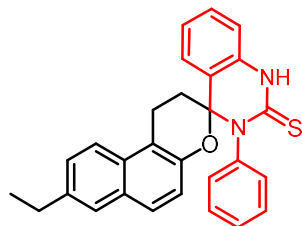

**8-Ethyl-3'-phenyl-1,2-dihydro-1'H-spiro[benzo[f]chromene-3,4'-quinazoline]-2'(3'H)-thione (5m)**

The title compound was obtained as a yellow solid (150.4 mg, 69%). Mp: 237.9-238.6 °C.

**<sup>1</sup>H NMR (400 MHz, DMSO-*d*<sub>6</sub>)** δ 11.60 (s, 1H), 7.67 (d, *J* = 7.2 Hz, 1H), 7.63-7.49 (m, 2H), 7.47-7.10 (m, 9H), 7.07-6.95 (m, 1H), 6.83 (d, *J* = 8.0 Hz, 1H), 2.92-2.62 (m, 4H), 2.60-2.39 (m, 2H), 1.22 (t, *J* = 7.8 Hz, 3H). **<sup>13</sup>C NMR (100 MHz, DMSO-*d*<sub>6</sub>)** δ 176.1, 150.3, 140.5, 139.6, 133.9, 132.0, 130.5, 130.3, 129.4, 128.5, 128.2, 128.1, 128.1, 126.4, 124.8, 123.6, 123.5, 122.7, 118.2, 114.8, 113.9, 88.5, 30.7, 28.4, 18.4, 16.1. **HRMS (ESI-TOF)** *m/z* calcd. for C<sub>28</sub>H<sub>25</sub>N<sub>2</sub>OS<sup>+</sup> [M+H]<sup>+</sup>: 437.1682; found: 437.1678.

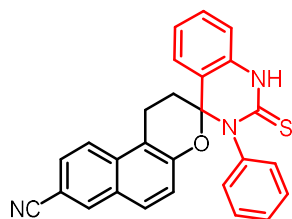

**3'-Phenyl-2'-thioxo-1,2,2',3'-tetrahydro-1'H-spiro[benzo[f]chromene-3,4'-quinazoline]-8-carbonitrile (5n)**

The title compound was obtained as a yellow solid (125.6 mg, 58%). Mp: 219.7-220.9 °C.

**<sup>1</sup>H NMR (400 MHz, DMSO-*d*<sub>6</sub>)** δ 11.65 (s, 1H), 8.44 (s, 1H), 7.91 (d, *J* = 8.8 Hz, 1H), 7.81 (d, *J* = 9.2 Hz, 1H), 7.75 (d, *J* = 8.8 Hz, 1H), 7.42 (t, *J* = 7.6 Hz, 2H), 7.32-7.16 (m, 6H), 7.10-7.02 (m, 2H), 2.95-2.82 (m, 1H), 2.79-2.71 (m, 1H), 2.70-2.61 (m, 1H), 2.58-2.52 (m, 1H). **<sup>13</sup>C NMR (100 MHz, DMSO-*d*<sub>6</sub>)** δ 176.1, 153.3, 140.5, 134.9, 133.93, 133.89, 132.0, 130.5, 129.4, 128.6, 128.4, 128.2, 127.6, 124.9, 124.3, 123.8, 123.0, 120.3, 119.8, 114.9, 114.7, 106.4, 88.8, 30.5, 18.4. **HRMS (ESI-TOF)** *m/z* calcd. for C<sub>27</sub>H<sub>20</sub>N<sub>3</sub>OS<sup>+</sup> [M+H]<sup>+</sup>: 434.1322; found: 434.1325.

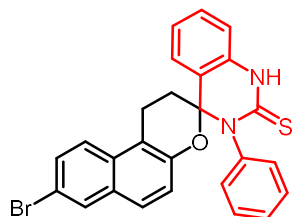

**8-Bromo-3'-phenyl-1,2-dihydro-1'H-spiro[benzo[f]chromene-3,4'-quinazoline]-2'(3'H)-thione (5o)**

The title compound was obtained as a yellow solid (138.5 mg, 57%). Mp: 238.9-240.2 °C.

**<sup>1</sup>H NMR (400 MHz, DMSO-*d*<sub>6</sub>)** δ 11.64 (s, 1H), 8.08 (s, 1H), 7.70 (d, *J* = 8.8 Hz, 1H), 7.65 (d, *J* = 8.8 Hz, 1H), 7.58 (d, *J* = 8.4 Hz, 1H), 7.46-7.35 (m, 2H), 7.34-7.15 (m, 6H), 7.05 (t, *J* = 7.2 Hz, 1H), 6.93 (d, *J* = 8.8 Hz, 1H), 2.90-2.78 (m, 1H), 2.78-2.67 (m, 1H), 2.65-2.56 (m, 1H), 2.50-2.39 (m, 1H). **<sup>13</sup>C NMR (100 MHz, DMSO-*d*<sub>6</sub>)** δ 176.1, 151.2, 140.5, 133.9, 132.0, 130.7, 130.54, 130.45, 130.4, 129.9, 128.5, 128.3, 127.9, 125.1, 124.9, 123.7, 123.3, 119.6, 117.2, 114.9, 114.4, 88.6, 30.5, 18.4. **HRMS (ESI-TOF)** *m/z* calcd. for C<sub>26</sub>H<sub>20</sub>BrN<sub>2</sub>OS<sup>+</sup> [M+H]<sup>+</sup>: 487.0474; found: 487.0468.



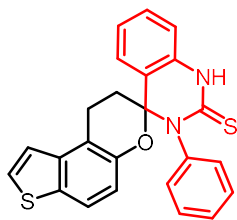

### 3-Phenyl-8',9'-dihydro-1H-spiro[quinazoline-4,7'-thieno[3,2-f]chromene]-2(3H)-thione (5p)

The title compound was obtained as a yellow solid (136.2 mg, 66%). Mp: 248.3-250.1 °C.

<sup>1</sup>H NMR (400 MHz, DMSO-d<sub>6</sub>) δ 11.56 (s, 1H), 7.73 (d, *J* = 5.2 Hz, 1H), 7.65 (d, *J* = 8.8 Hz, 1H), 7.40 (t, *J* = 7.2 Hz, 1H), 7.36-7.23 (m, 7H), 7.16 (d, *J* = 7.6 Hz, 1H), 7.05 (t, *J* = 7.6 Hz, 1H), 6.67 (d, *J* = 8.8 Hz, 1H), 2.82-2.74 (m, 1H), 2.73-2.65 (m, 1H), 2.59-2.51 (m, 1H), 2.47-2.39 (m, 1H). <sup>13</sup>C NMR (100 MHz, DMSO-d<sub>6</sub>) δ 176.0, 150.5, 140.5, 138.9, 133.8, 132.4, 132.1, 130.3, 129.1, 128.5, 128.2, 124.9, 123.6, 121.9, 115.8, 115.0, 114.8, 88.9, 30.9, 19.7. HRMS (ESI-TOF) *m/z* calcd. for C<sub>24</sub>H<sub>19</sub>N<sub>2</sub>OS<sup>+</sup> [M+H]<sup>+</sup>: 415.0933; found: 415.0929.

### One-pot/two-step synthesis of 3a and 5c

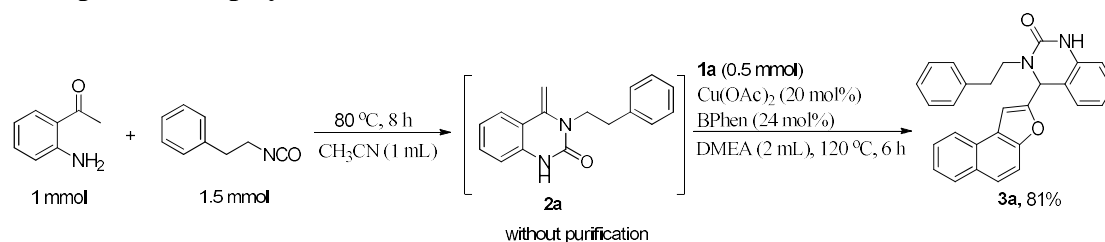

To a 10-mL Schlenk tube was added 1-(2-aminophenyl)ethanone (135.3 mg, 1.0 mmol), (2-isocyanatoethyl)benzene (221.0 mg, 1.50 mmol), and CH<sub>3</sub>CN (1 mL) under air. The resulting mixture was then stirred at 80 °C (heating mantle) for 8 h (monitored by TLC) and then cooled to room temperature. To the reaction mixture were then added 2-Naphthol **1a** (72.5 mg, 0.50 mmol), Cu(OAc)<sub>2</sub> (18.0 mg, 0.10 mmol), BPhen (40.3 mg, 0.12 mmol) and DMEA (2 mL) and the resulting mixture was then stirred at 120 °C (heating mantle) for 6 h (monitored by TLC) and then cooled to room temperature. The reaction mixture was diluted with CH<sub>2</sub>Cl<sub>2</sub> (30 mL) and washed with H<sub>2</sub>O (10 mL × 3). The organic fraction was then dried over anhydrous Na<sub>2</sub>SO<sub>4</sub>. Filtration, concentration, and purification by flash chromatography on silica gel (eluent: PE/EA=4/1) afforded product **3a** (170.0 mg, 81%) as a white solid.

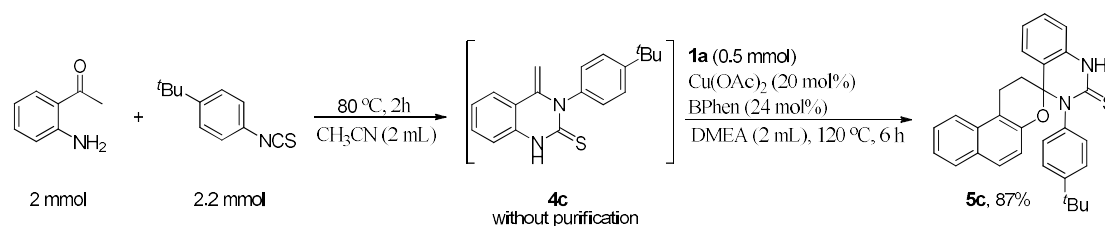

To a 10-mL Schlenk tube was added 1-(2-aminophenyl)ethanone (270.3 mg, 2.0 mmol), 1-(*tert*-butyl)-4-isothiocyanatobenzene (420.8 mg, 2.2 mmol), and CH<sub>3</sub>CN (2 mL) under air.

The resulting mixture was then stirred at 80 °C (heating mantle) for 2 h (monitored by TLC) and then cooled to room temperature. To the reaction mixture were then added 2-Naphthol **1a** (72.4 mg, 0.50 mmol), Cu(OAc)<sub>2</sub> (18.1 mg, 0.10 mmol), BPhen (40.4 mg, 0.12 mmol) and DMEA (2 mL) and the resulting mixture was then stirred at 120 °C (heating mantle) for 6 h (monitored by TLC) and then cooled to room temperature. The reaction mixture was diluted with CH<sub>2</sub>Cl<sub>2</sub> (30 mL) and washed with H<sub>2</sub>O (10 mL × 3). The organic fraction was then dried over anhydrous Na<sub>2</sub>SO<sub>4</sub>. Filtration, concentration, and purification by flash chromatography on silica gel (eluent: PE/EA=8/1) afforded product **5c** (201.8 mg, 87%) as a yellow solid.

#### Reference:

1. Yan, H.; Xiao, X. Q.; Hider, R. C.; Ma, Y. A Simple Metal-Free Cyclization for the Synthesis of 4-Methylene-3-Substituted Quinazolinone and Quinazolinthione Derivatives: Experiment and Theory. *Front. Chem.* **2019**, *7*, 584.

## Crystal data and structure refinement for product 3a and 5o

### Crystal data and structure refinement for 3a

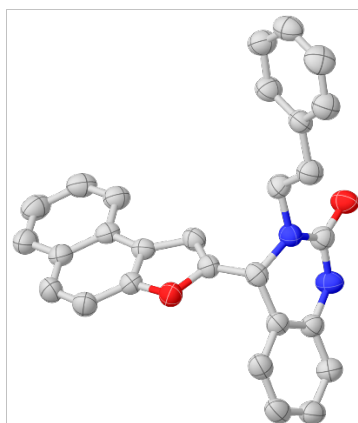

|                                             |                                                               |
|---------------------------------------------|---------------------------------------------------------------|
| CCDC                                        | 2252986                                                       |
| Empirical formula                           | C <sub>28</sub> H <sub>22</sub> N <sub>2</sub> O <sub>2</sub> |
| Formula weight                              | 418.47                                                        |
| Temperature/K                               | 296.15                                                        |
| Crystal system                              | monoclinic                                                    |
| Space group                                 | P2 <sub>1</sub> /c                                            |
| a/Å                                         | 11.729(11)                                                    |
| b/Å                                         | 8.819(8)                                                      |
| c/Å                                         | 20.73(2)                                                      |
| α/°                                         | 90                                                            |
| β/°                                         | 96.055(13)                                                    |
| γ/°                                         | 90                                                            |
| Volume/Å <sup>3</sup>                       | 2132(4)                                                       |
| Z                                           | 4                                                             |
| ρ <sub>calc</sub> /cm <sup>3</sup>          | 1.304                                                         |
| μ/mm <sup>-1</sup>                          | 0.083                                                         |
| F(000)                                      | 880.0                                                         |
| Crystal size/mm <sup>3</sup>                | 0.15 × 0.15 × 0.12                                            |
| Radiation                                   | MoKα (λ = 0.71073)                                            |
| 2θ range for data collection/°              | 3.492 to 57.214                                               |
| Index ranges                                | -15 ≤ h ≤ 15, -11 ≤ k ≤ 11, -27 ≤ l ≤ 27                      |
| Reflections collected                       | 28008                                                         |
| Independent reflections                     | 5426 [R <sub>int</sub> = 0.1302, R <sub>sigma</sub> = 0.1147] |
| Data/restraints/parameters                  | 5426/0/290                                                    |
| Goodness-of-fit on F <sup>2</sup>           | 0.989                                                         |
| Final R indexes [I ≥ 2σ(I)]                 | R <sub>1</sub> = 0.0652, wR <sub>2</sub> = 0.1242             |
| Final R indexes [all data]                  | R <sub>1</sub> = 0.1915, wR <sub>2</sub> = 0.1672             |
| Largest diff. peak/hole / e Å <sup>-3</sup> | 0.20/-0.18                                                    |

## Crystal data and structure refinement for 5o

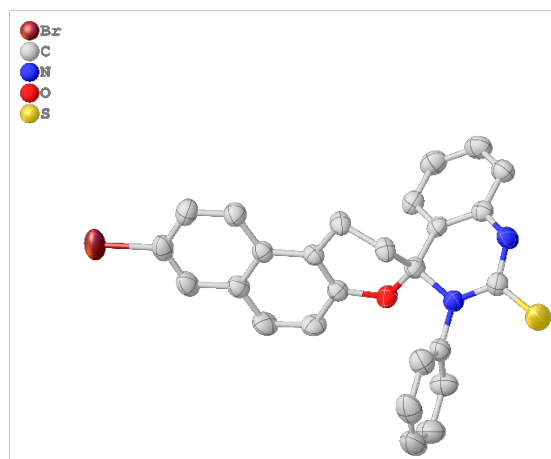

|                                               |                                                               |
|-----------------------------------------------|---------------------------------------------------------------|
| CCDC                                          | 2265608                                                       |
| Empirical formula                             | $C_{28}H_{25}BrN_2O_2S_2$                                     |
| Formula weight                                | 565.53                                                        |
| Temperature/K                                 | 296.15                                                        |
| Crystal system                                | monoclinic                                                    |
| Space group                                   | $P2_1/n$                                                      |
| $a/\text{\AA}$                                | 15.5495(14)                                                   |
| $b/\text{\AA}$                                | 10.6842(9)                                                    |
| $c/\text{\AA}$                                | 15.9646(14)                                                   |
| $\alpha/^\circ$                               | 90                                                            |
| $\beta/^\circ$                                | 103.979(2)                                                    |
| $\gamma/^\circ$                               | 90                                                            |
| Volume/ $\text{\AA}^3$                        | 2573.7(4)                                                     |
| Z                                             | 4                                                             |
| $\rho_{\text{calc}}/\text{g/cm}^3$            | 1.459                                                         |
| $\mu/\text{mm}^{-1}$                          | 1.788                                                         |
| F(000)                                        | 1160.0                                                        |
| Crystal size/ $\text{mm}^3$                   | $0.15 \times 0.15 \times 0.12$                                |
| Radiation                                     | MoK $\alpha$ ( $\lambda = 0.71073$ )                          |
| $2\theta$ range for data collection/ $^\circ$ | 4.198 to 61.038                                               |
| Index ranges                                  | $-22 \leq h \leq 21, -14 \leq k \leq 15, -22 \leq l \leq 22$  |
| Reflections collected                         | 39018                                                         |
| Independent reflections                       | 7341 [ $R_{\text{int}} = 0.0573, R_{\text{sigma}} = 0.0511$ ] |
| Data/restraints/parameters                    | 7341/0/318                                                    |
| Goodness-of-fit on $F^2$                      | 1.009                                                         |
| Final R indexes [ $I \geq 2\sigma(I)$ ]       | $R_1 = 0.0461, wR_2 = 0.1042$                                 |
| Final R indexes [all data]                    | $R_1 = 0.1030, wR_2 = 0.1254$                                 |
| Largest diff. peak/hole / $e \text{\AA}^{-3}$ | 0.57/-0.50                                                    |

## NMR spectra

### $^1\text{H}$ NMR spectra of **3a** (400 MHz, DMSO- $d_6$ )

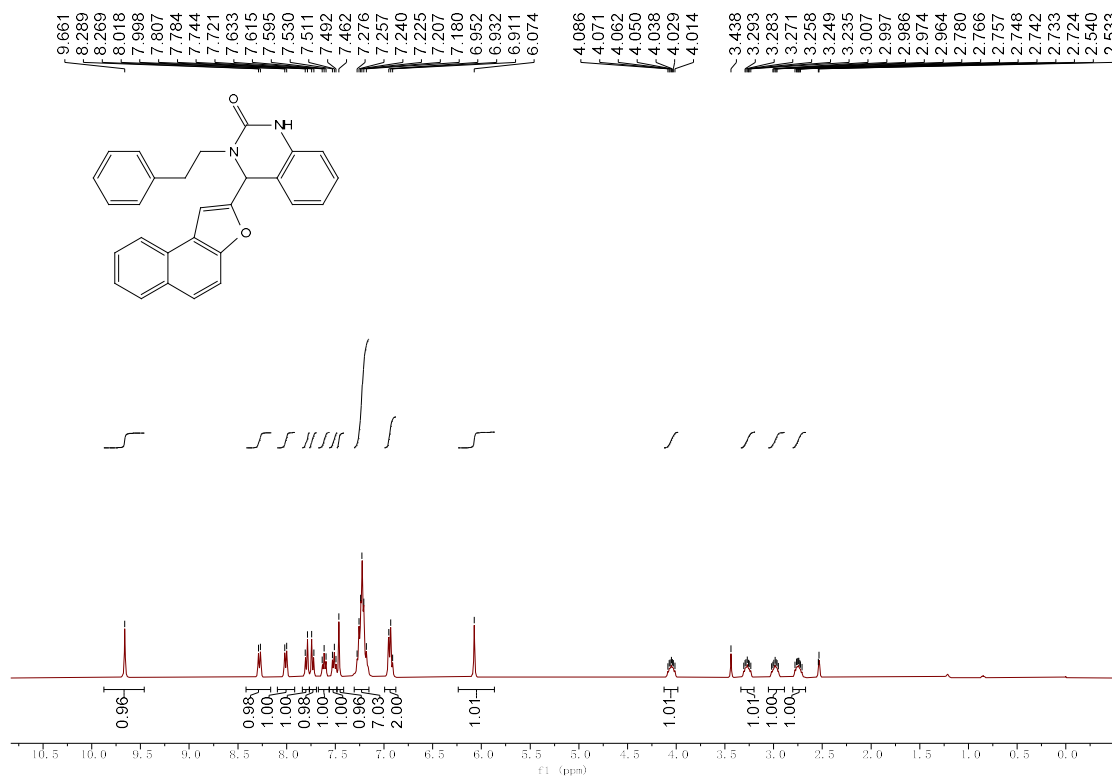

### $^{13}\text{C}\{^1\text{H}\}$ NMR spectra of **3a** (100 MHz, DMSO- $d_6$ )

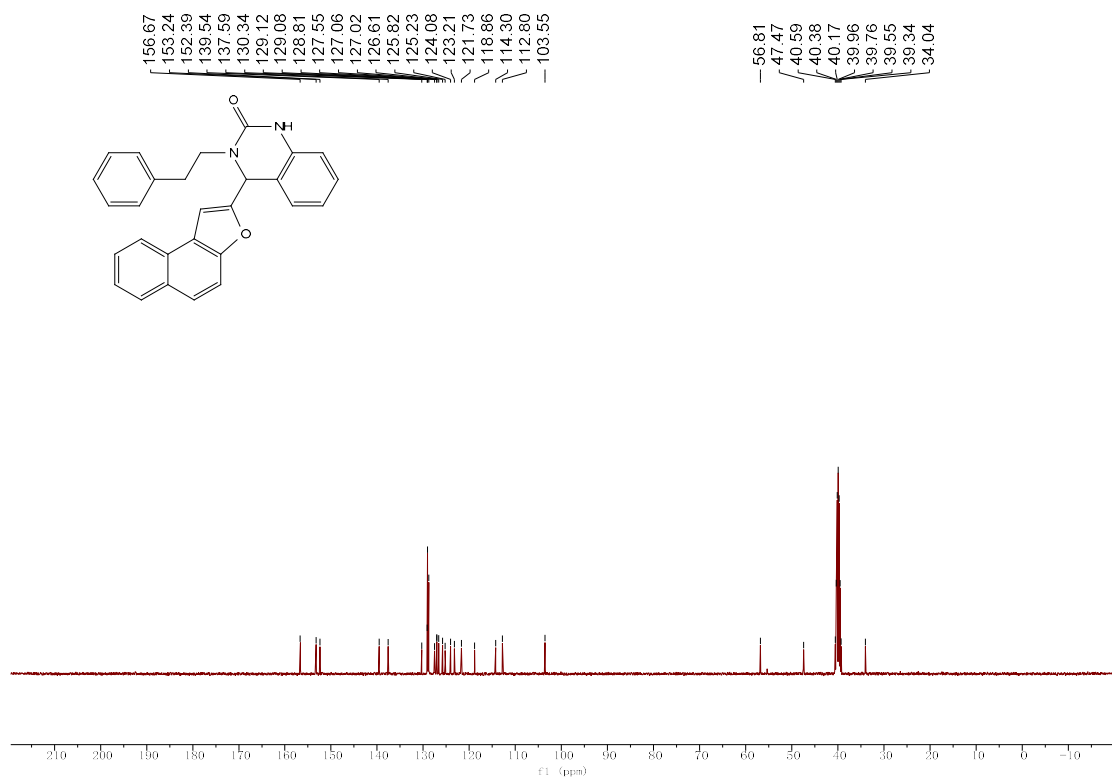

<sup>1</sup>H NMR spectra of **3b** (400 MHz, DMSO-d<sub>6</sub>)

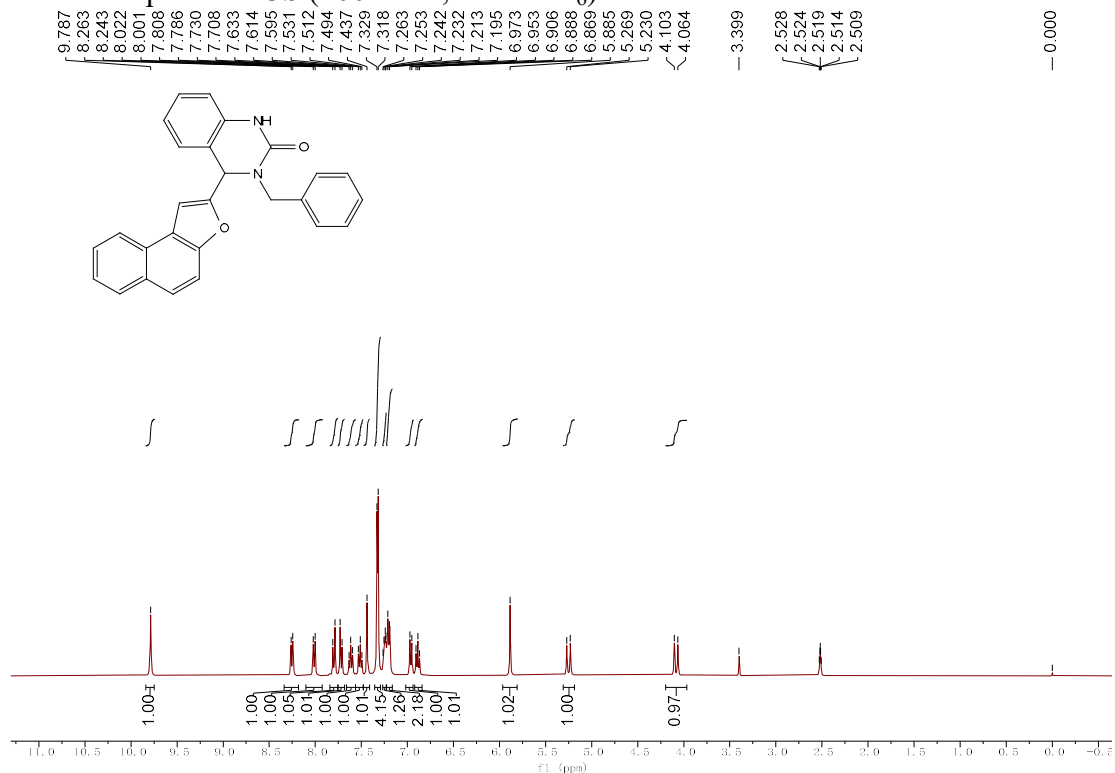

<sup>13</sup>C{<sup>1</sup>H} NMR spectra of **3b** (100 MHz, DMSO-d<sub>6</sub>)

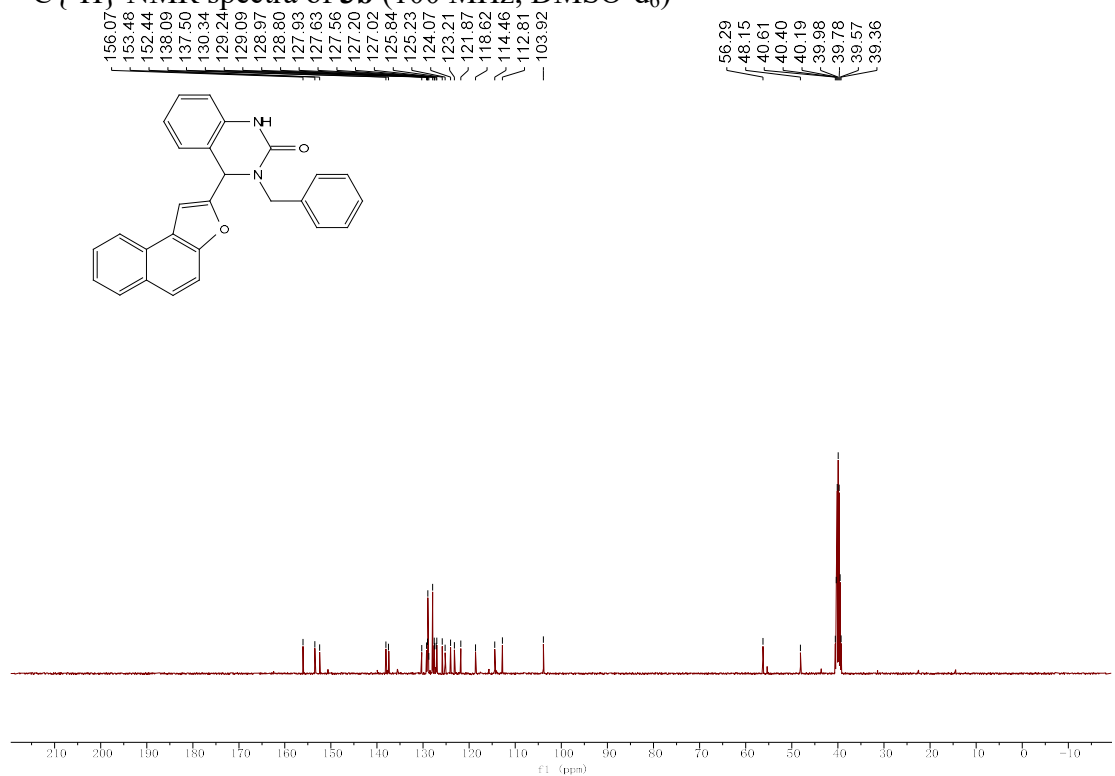

$^1\text{H}$  NMR spectra of **3c** (400 MHz, DMSO- $d_6$ )

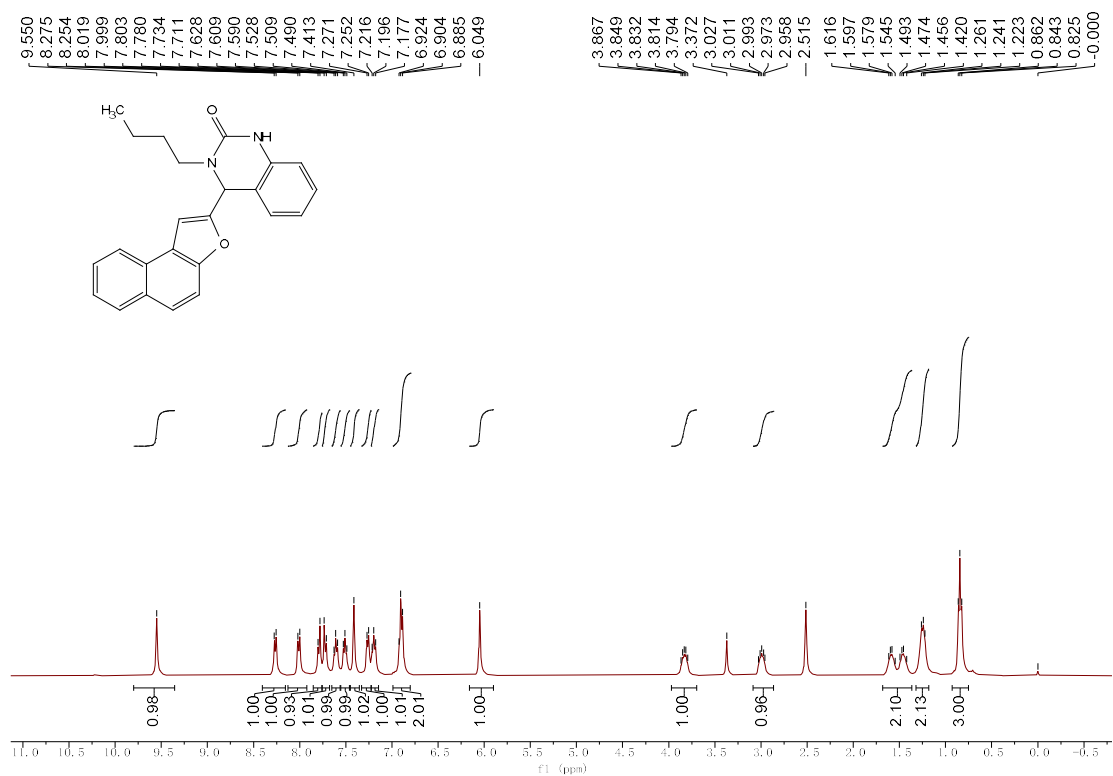

$^{13}\text{C}\{^1\text{H}\}$  NMR spectra of **3c** (100 MHz, DMSO- $d_6$ )

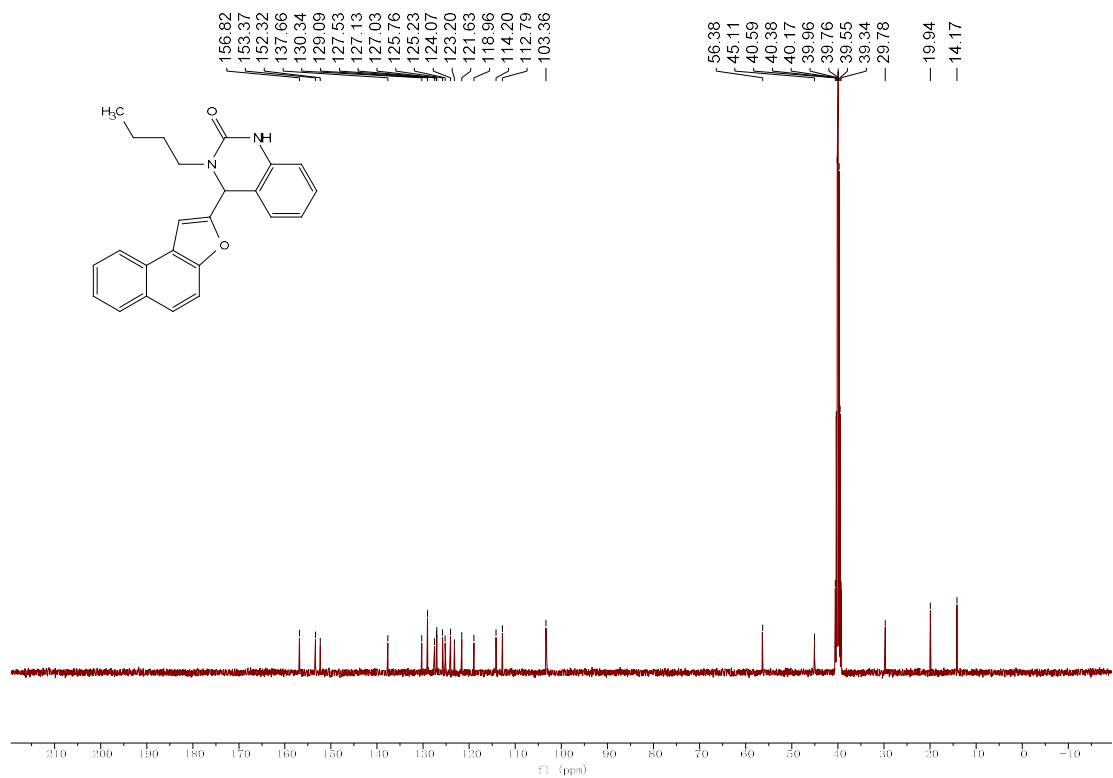

$^1\text{H}$  NMR spectra of **3d** (400 MHz,  $\text{DMSO-d}_6$ )

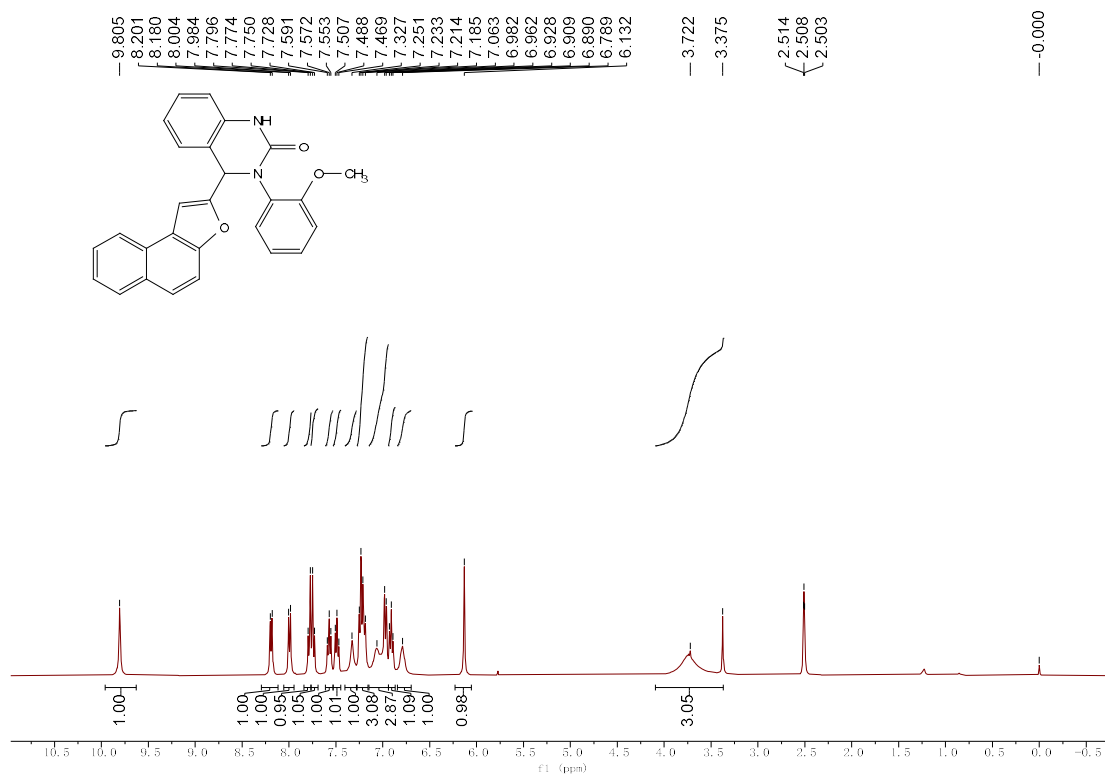

$^{13}\text{C}\{^1\text{H}\}$  NMR spectra of **3d** (100 MHz,  $\text{DMSO-d}_6$ )

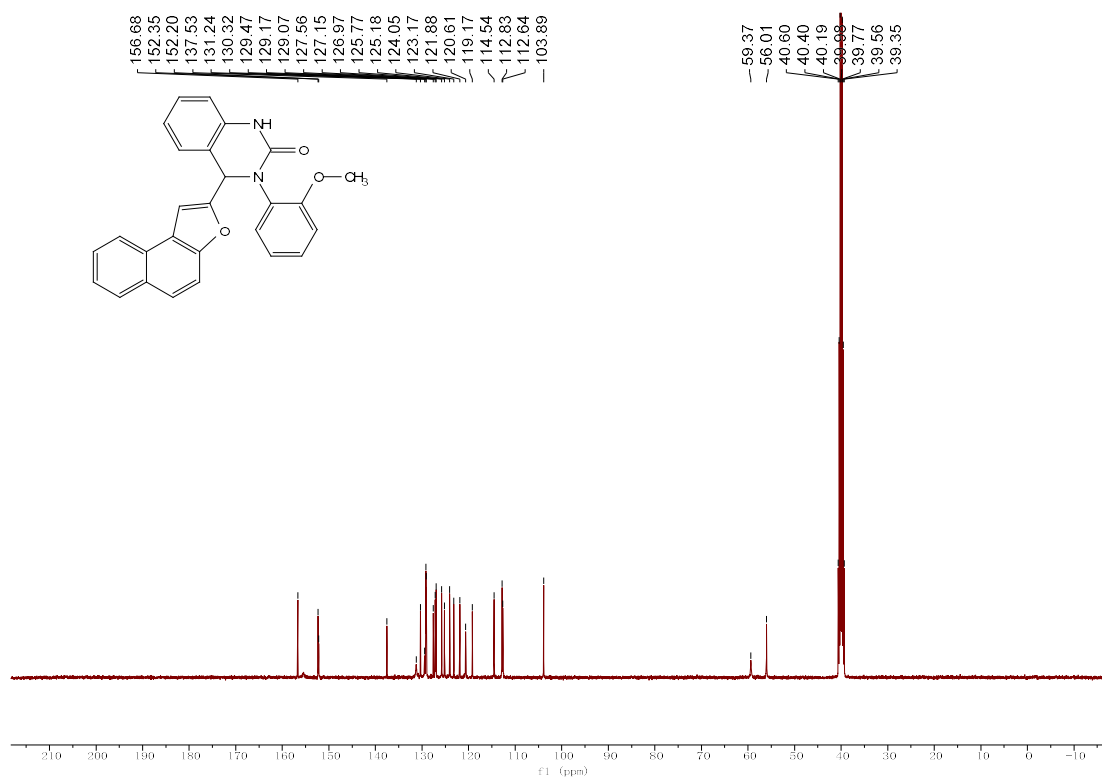



$^1\text{H}$  NMR spectra of **3e** (400 MHz, DMSO- $d_6$ )

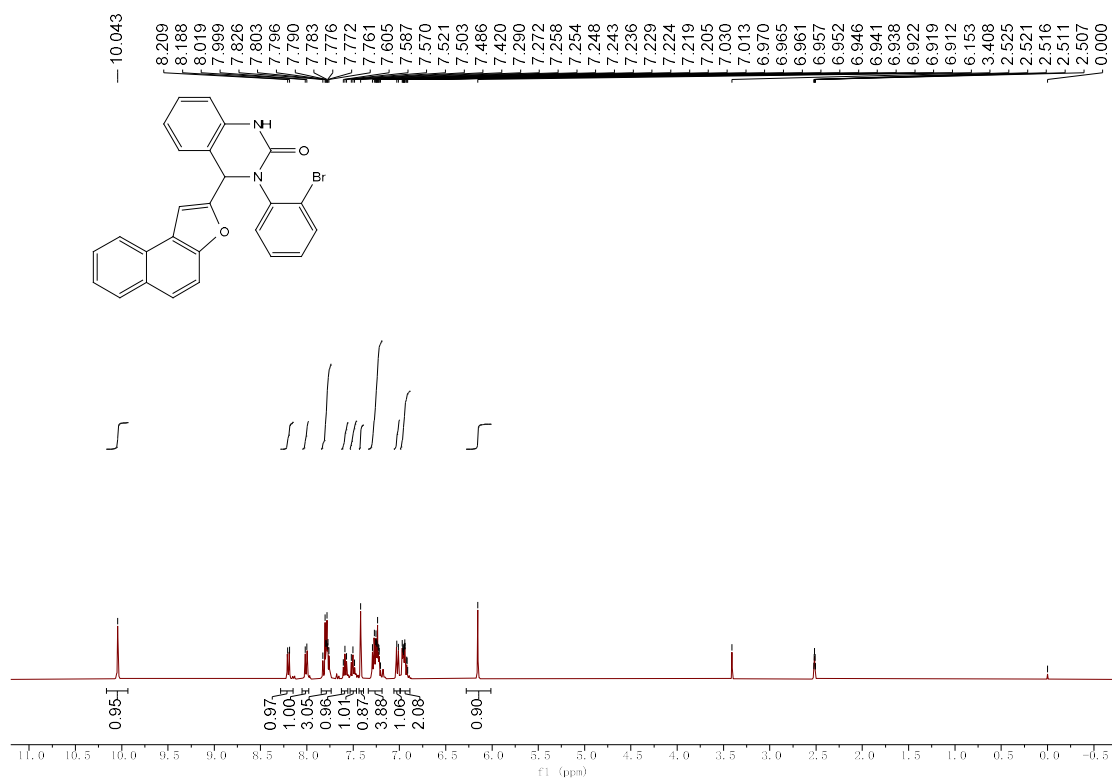

$^{13}\text{C}\{^1\text{H}\}$  NMR spectra of **3e** (100 MHz, DMSO- $d_6$ )

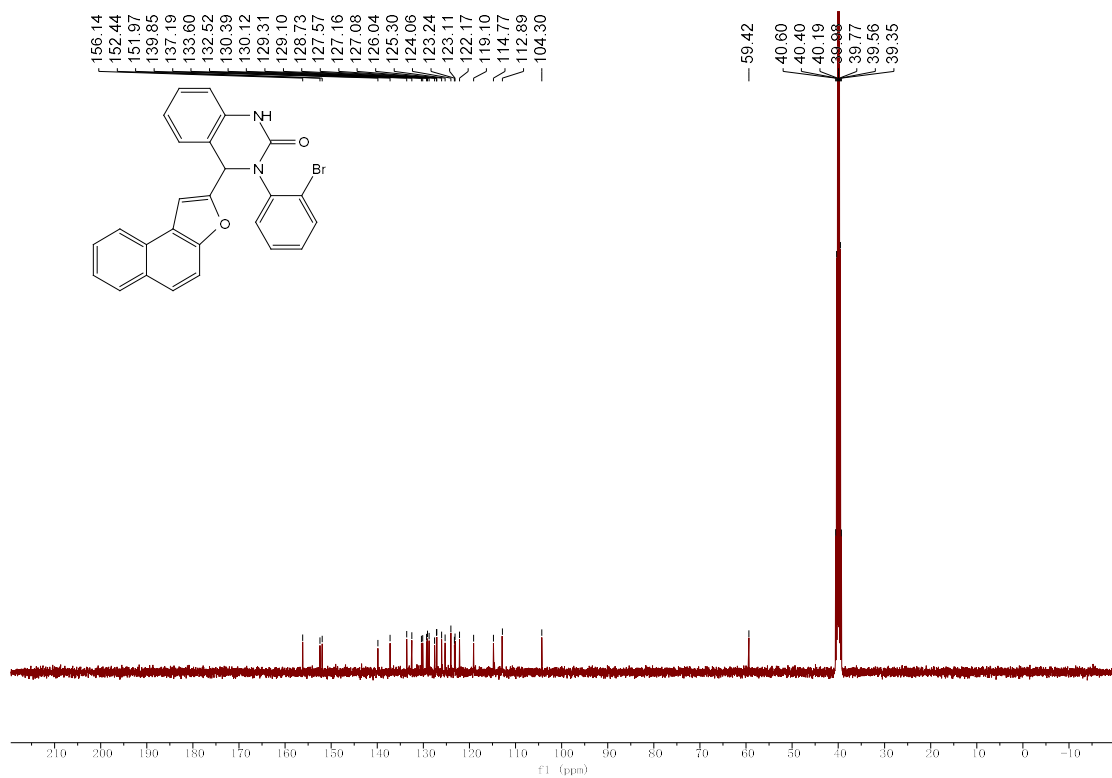

<sup>1</sup>H NMR spectra of **3f** (400 MHz, DMSO-d<sub>6</sub>)

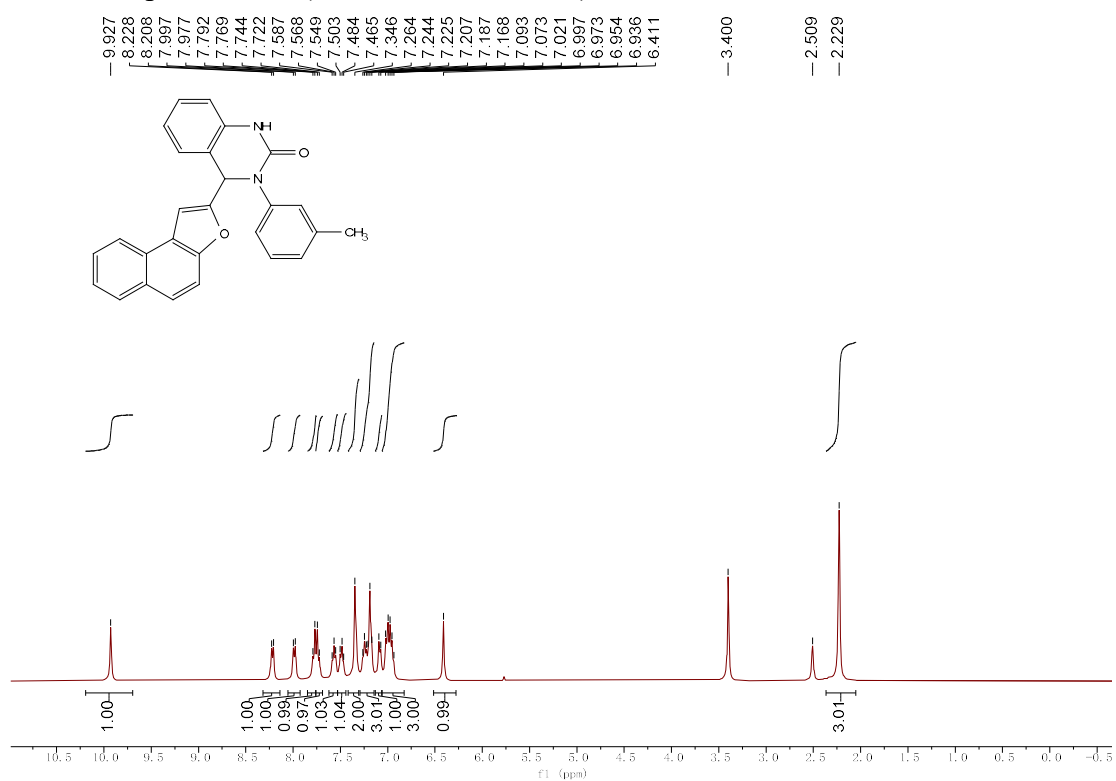

<sup>13</sup>C{<sup>1</sup>H} NMR spectra of **3f** (100 MHz, DMSO-d<sub>6</sub>)

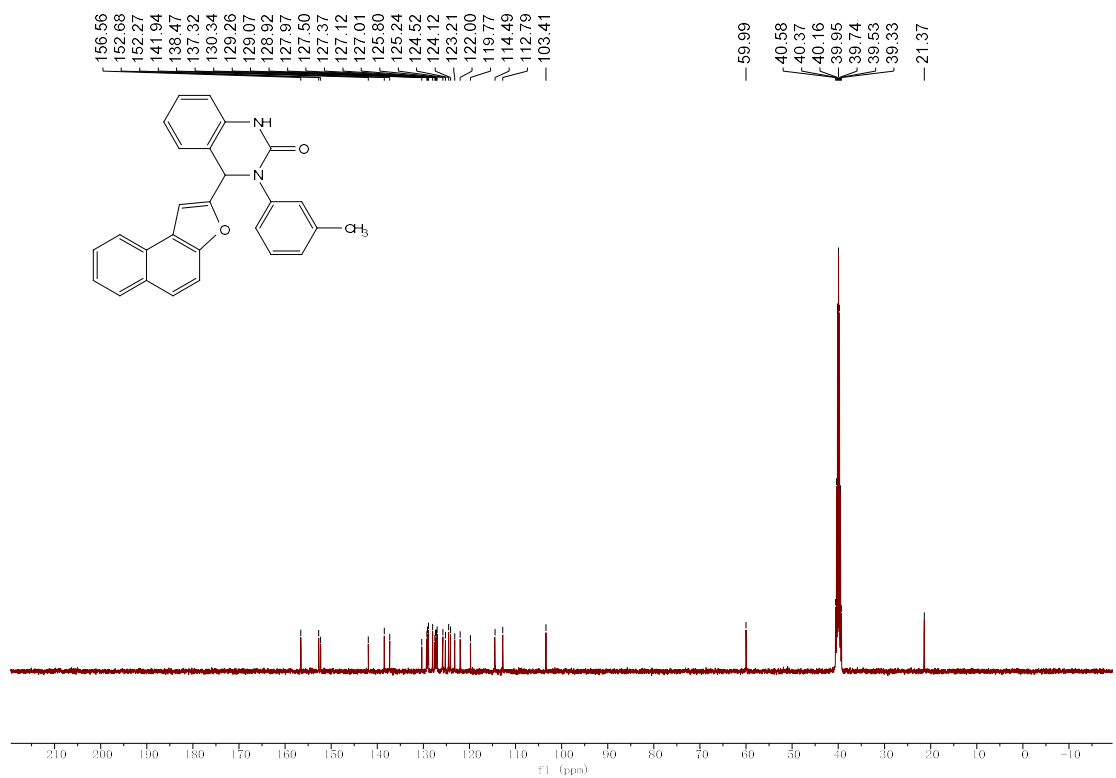

$^1\text{H}$  NMR spectra of **3g** (400 MHz, DMSO- $d_6$ )

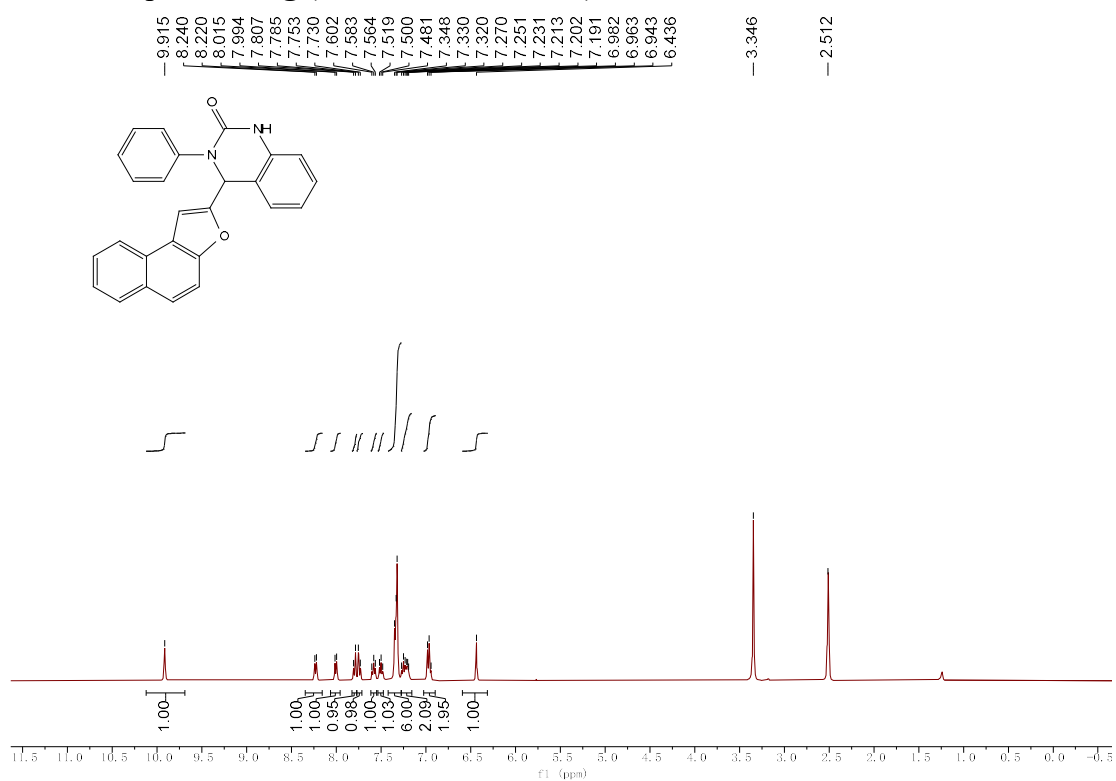

$^{13}\text{C}\{^1\text{H}\}$  NMR spectra of **3g** (100 MHz,  $\text{CDCl}_3$ )

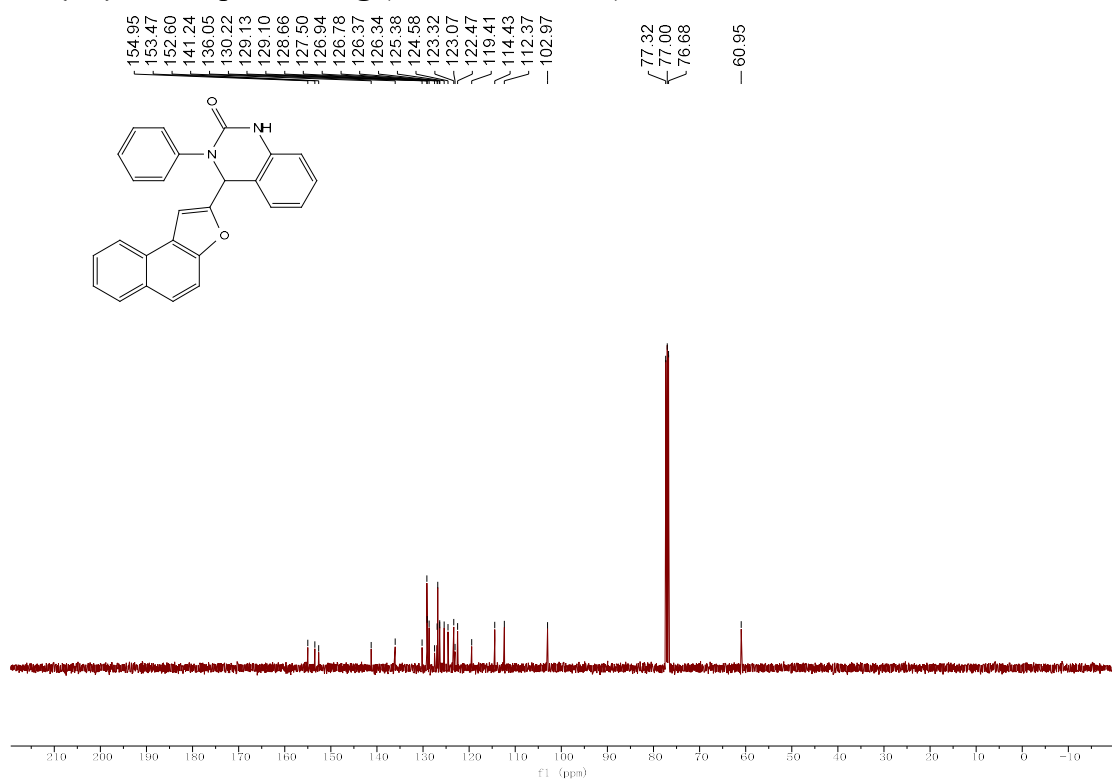

<sup>1</sup>H NMR spectra of **3h** (400 MHz, DMSO-d<sub>6</sub>)

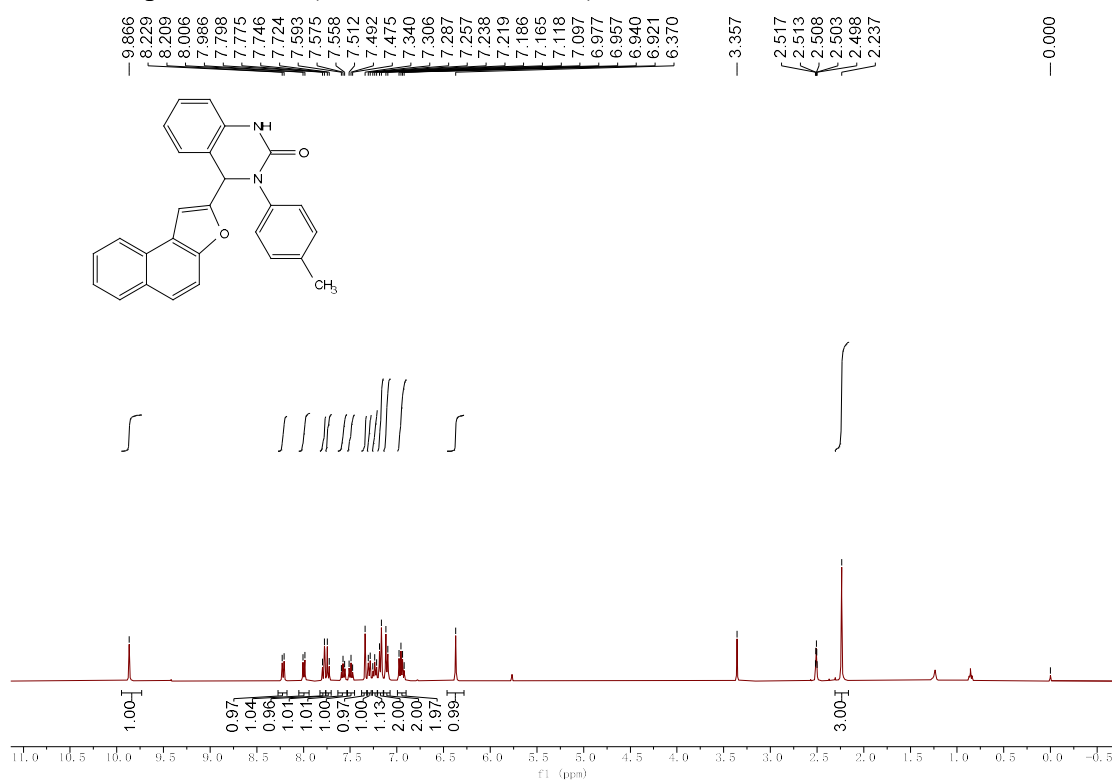

<sup>13</sup>C{<sup>1</sup>H} NMR spectra of **3h** (100 MHz, DMSO-d<sub>6</sub>)

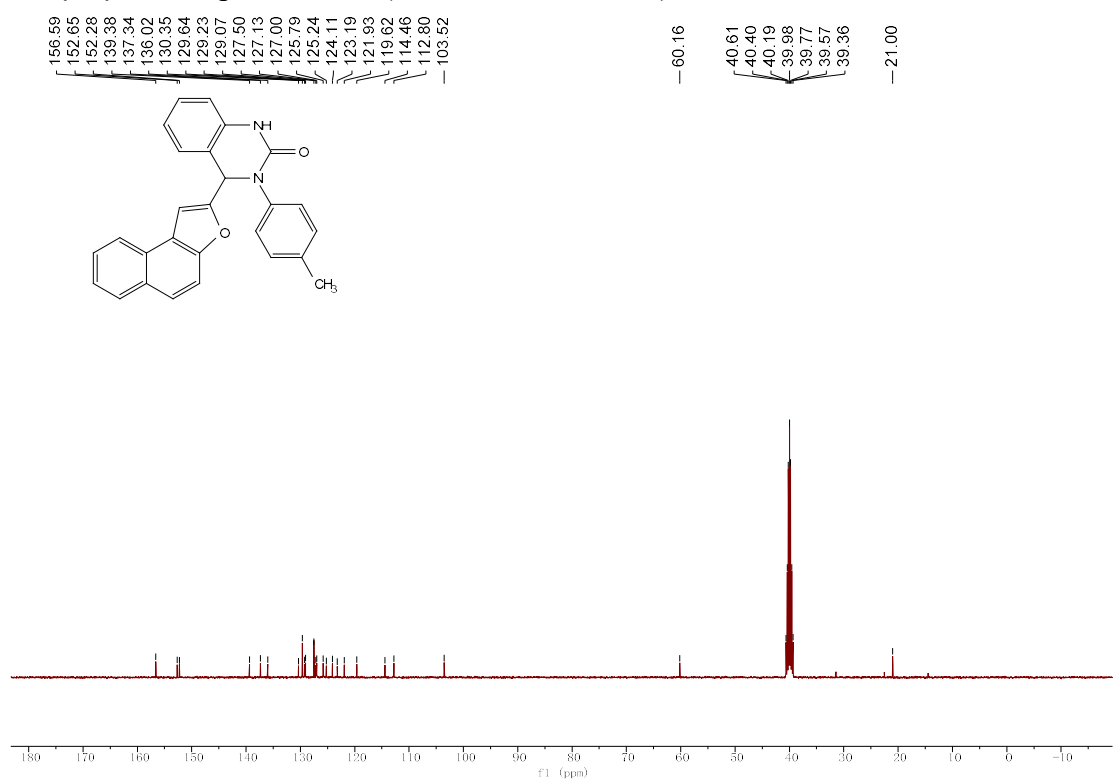

<sup>1</sup>H NMR spectra of **3i** (400 MHz, DMSO-d<sub>6</sub>)

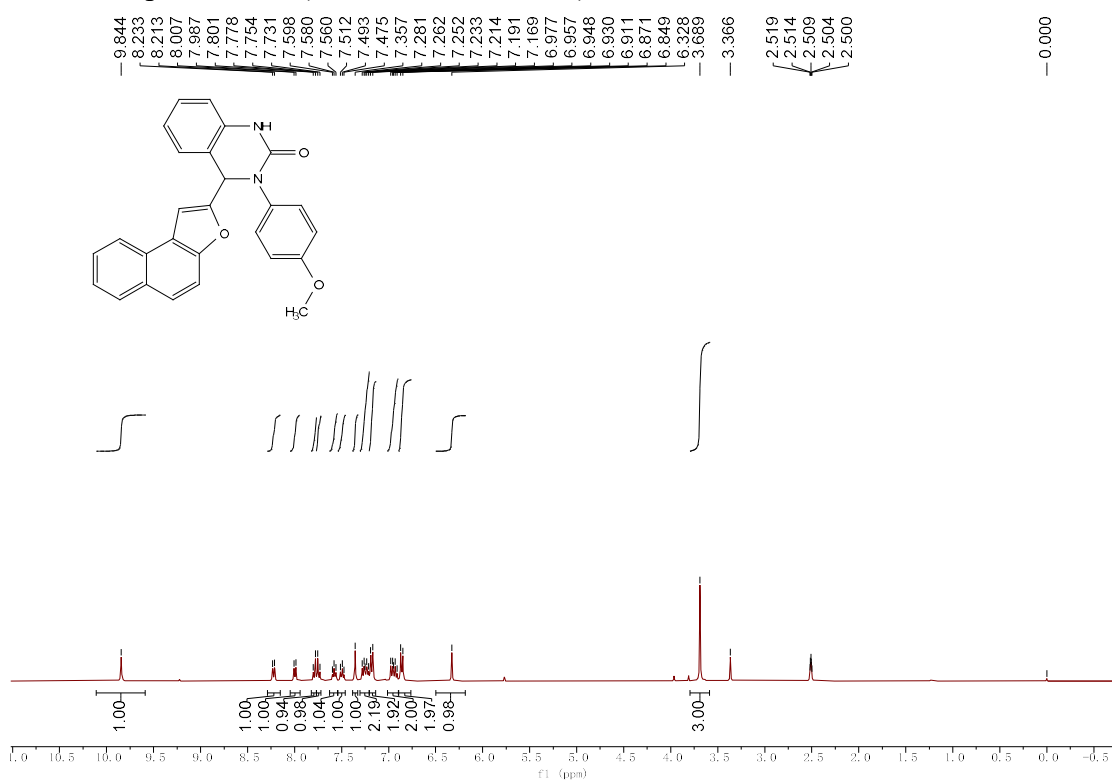

<sup>13</sup>C{<sup>1</sup>H} NMR spectra of **3i** (100 MHz, DMSO-d<sub>6</sub>)

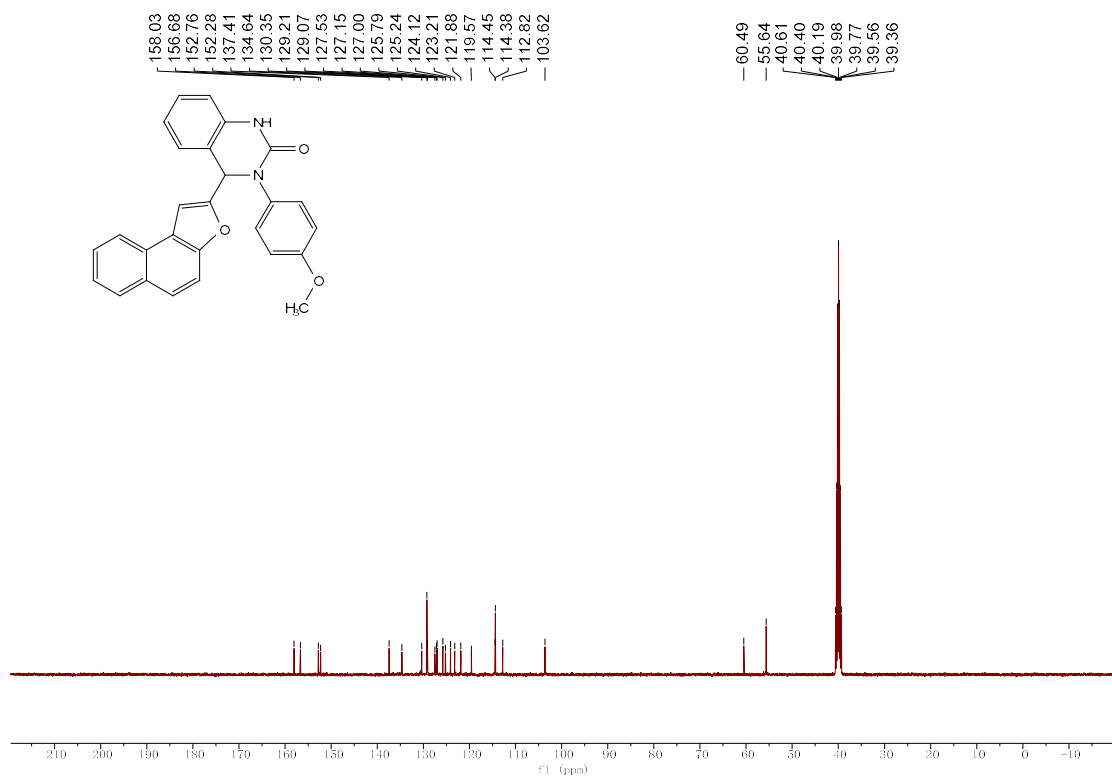

$^1\text{H}$  NMR spectra of **3j** (400 MHz, DMSO- $d_6$ )

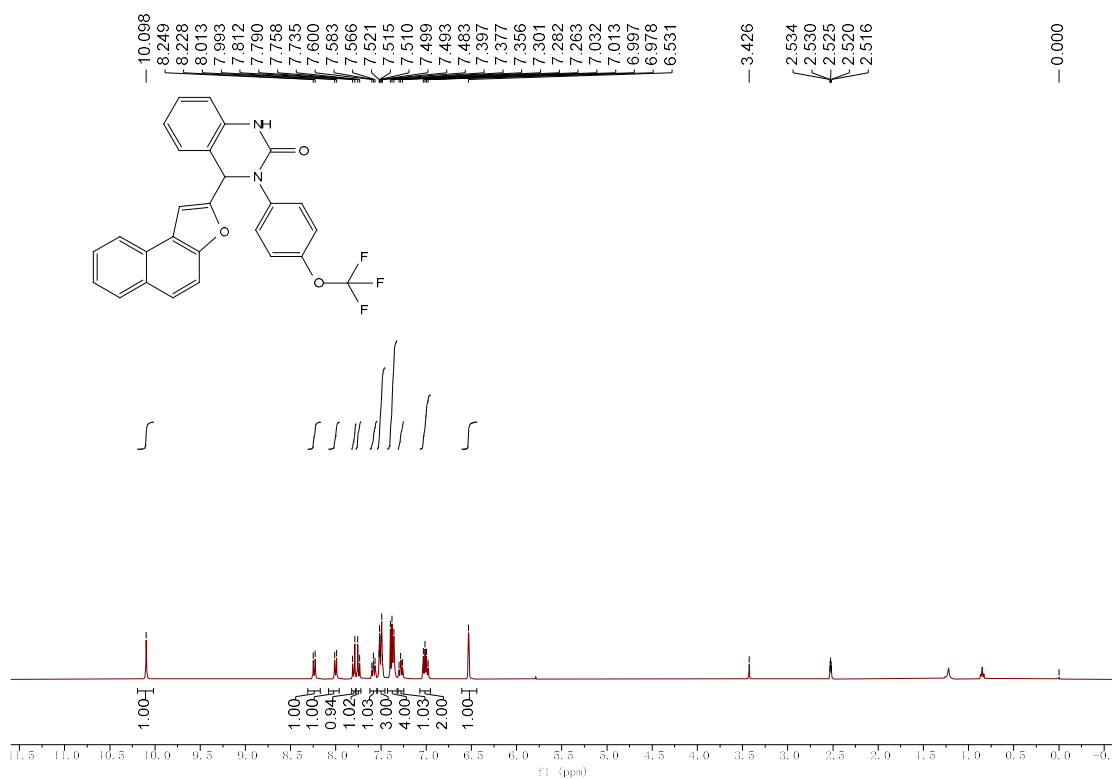

$^{13}\text{C}\{^1\text{H}\}$  NMR spectra of **3j** (100 MHz, DMSO- $d_6$ )

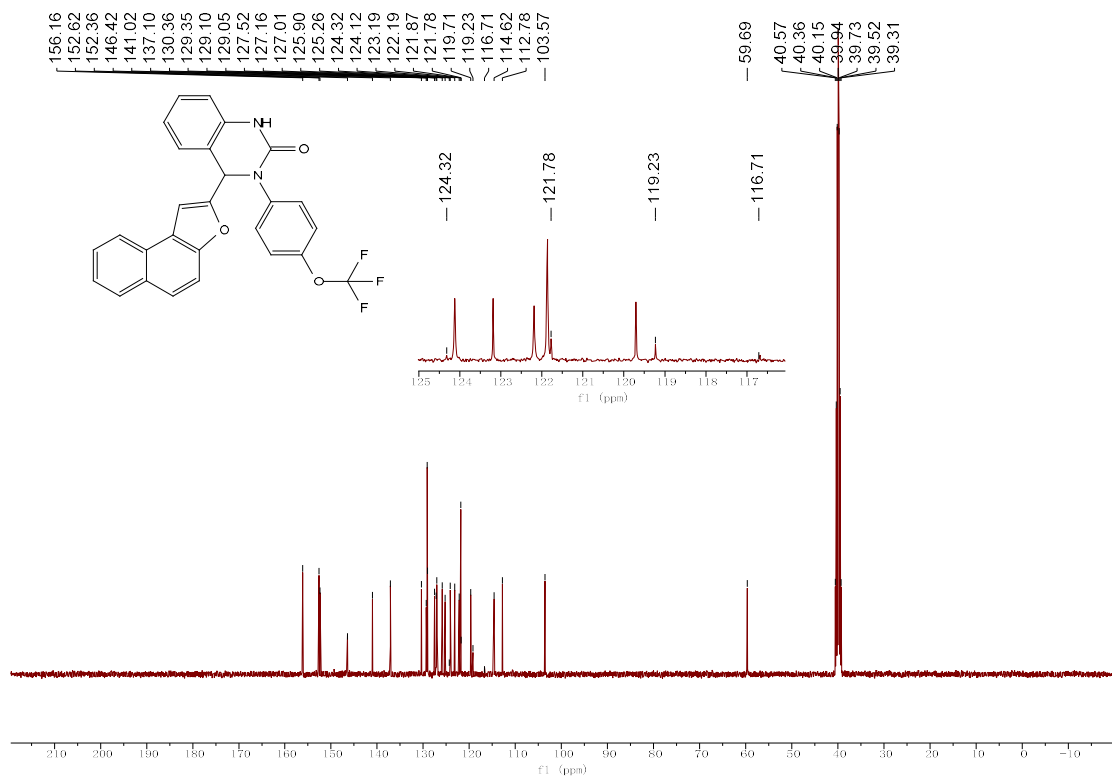

$^{19}\text{F}\{^1\text{H}\}$  NMR spectra of **3j** (377 MHz, DMSO- $d_6$ )

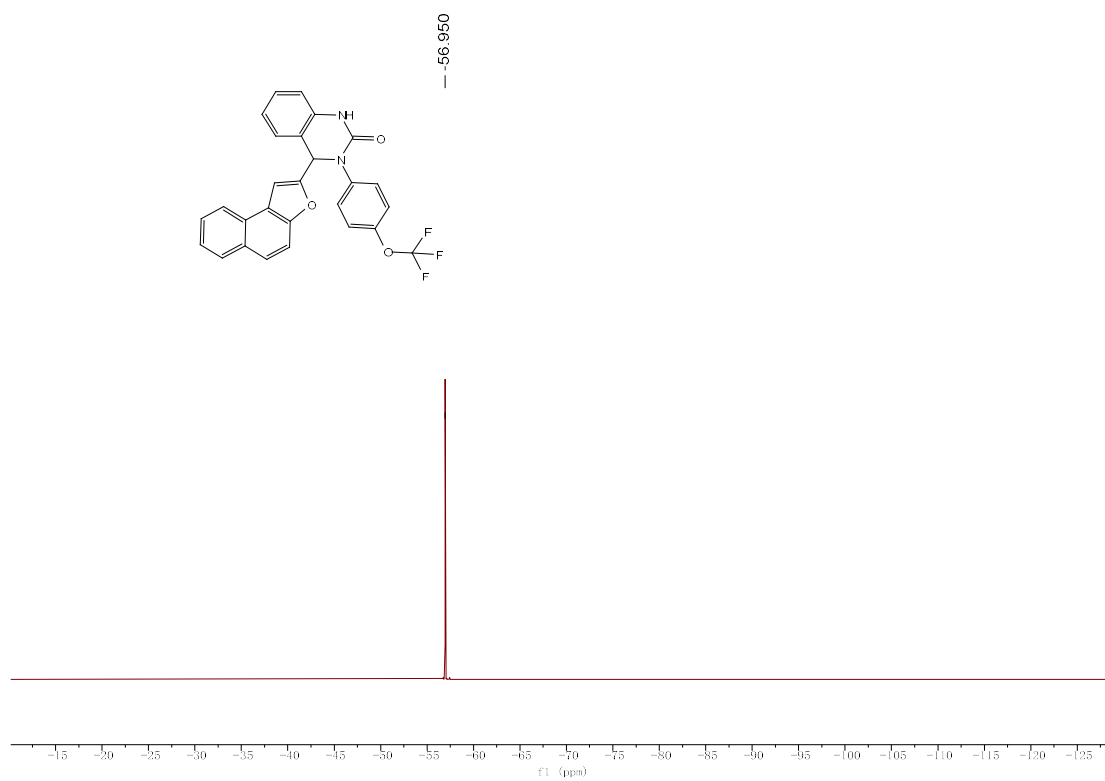

$^1\text{H}$  NMR spectra of **3k** (400 MHz, DMSO- $d_6$ )

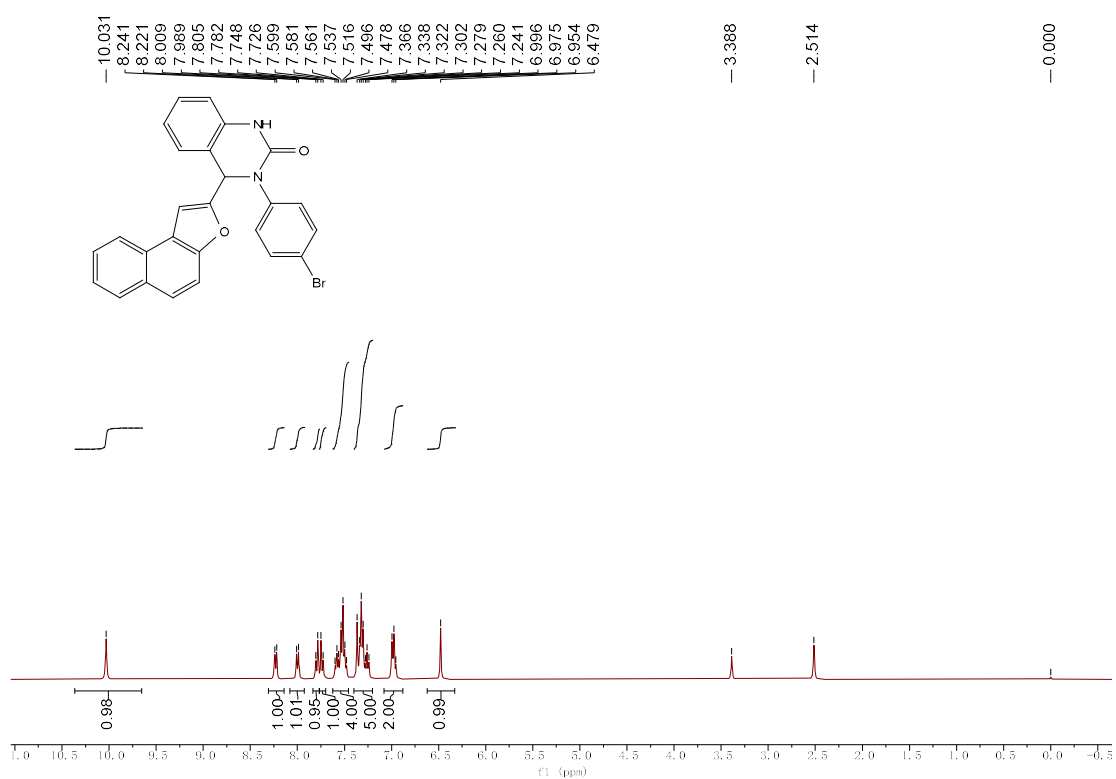

$^{13}\text{C}\{^1\text{H}\}$  NMR spectra of **3k** (100 MHz, DMSO- $d_6$ )

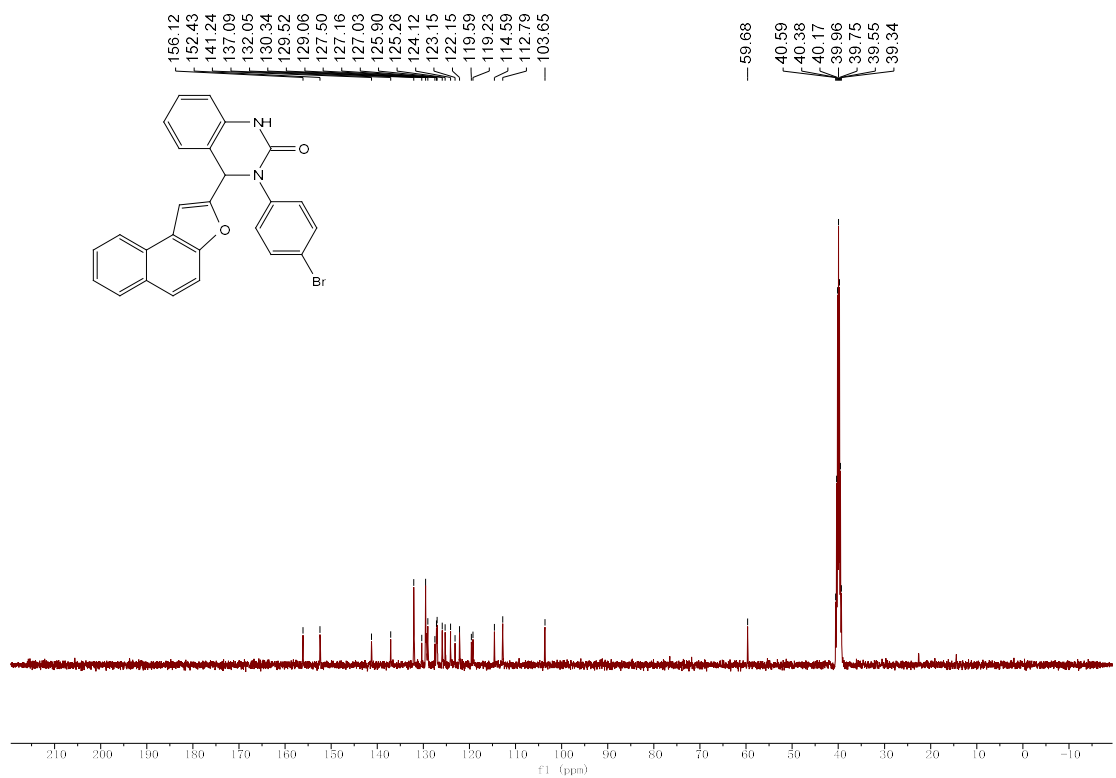



$^1\text{H}$  NMR spectra of **31** (400 MHz, DMSO- $d_6$ )

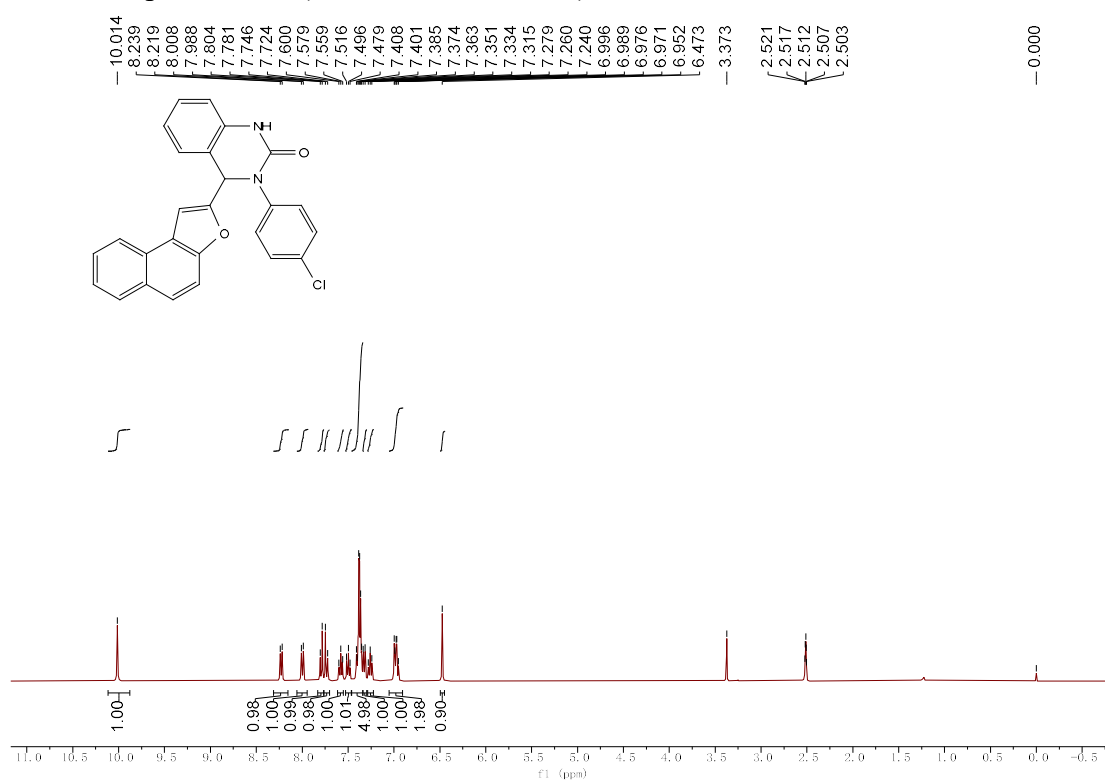

$^{13}\text{C}\{^1\text{H}\}$  NMR spectra of **31** (100 MHz, DMSO- $d_6$ )

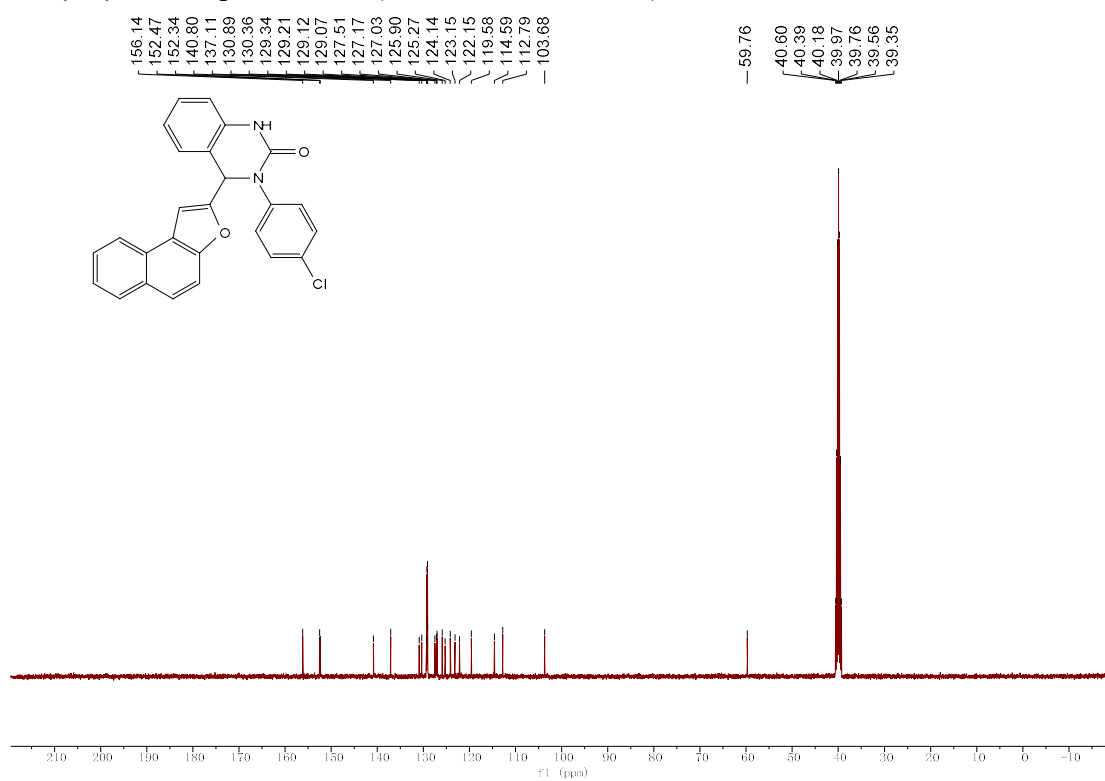

$^1\text{H}$  NMR spectra of **3m** (400 MHz, DMSO- $d_6$ )

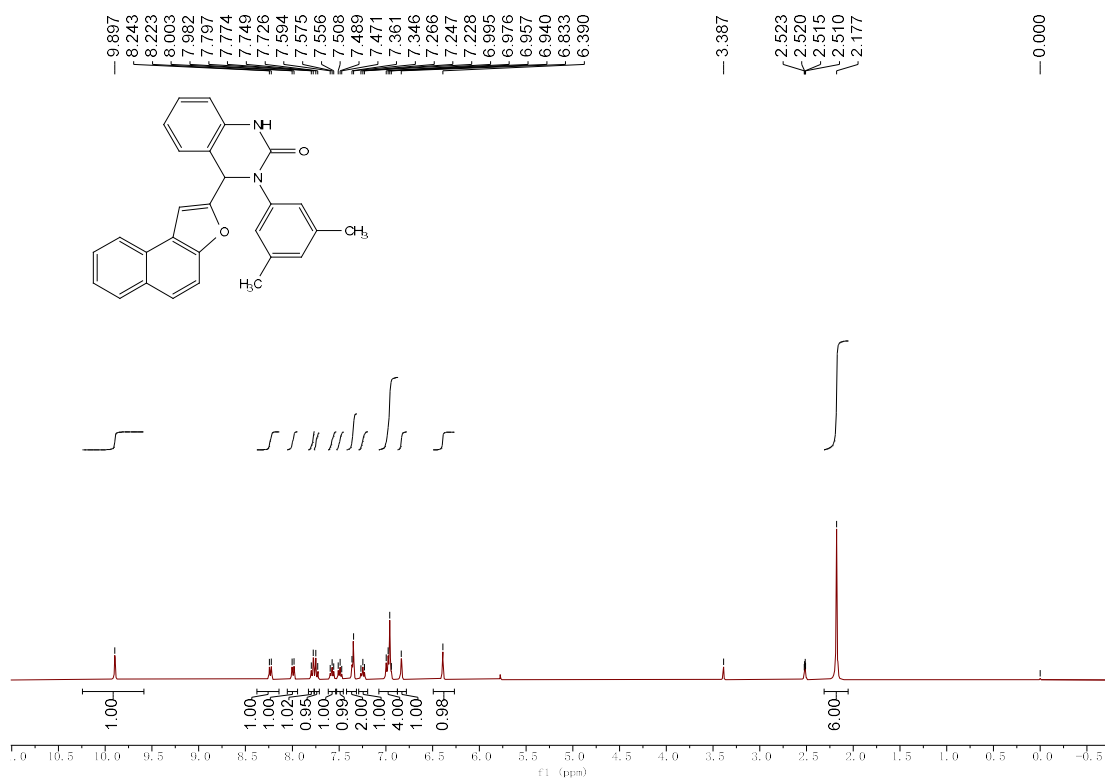

$^{13}\text{C}\{^1\text{H}\}$  NMR spectra of **3m** (100 MHz, DMSO- $d_6$ )

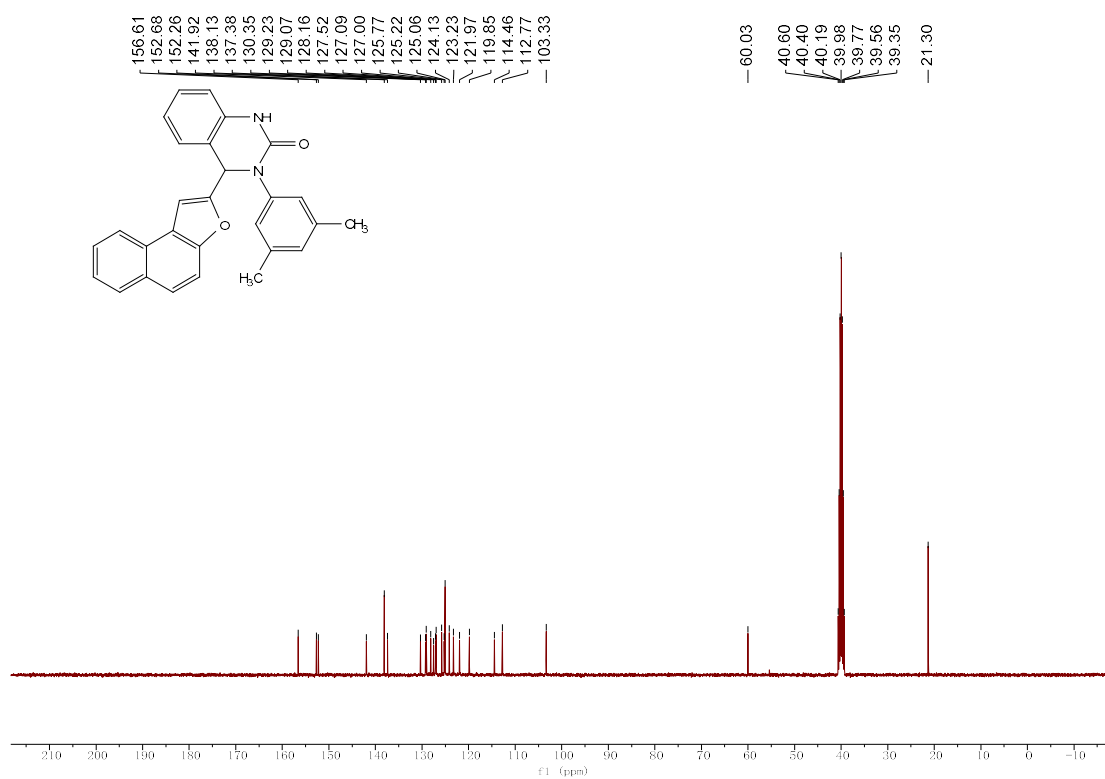

$^1\text{H}$  NMR spectra of **3n** (400 MHz, DMSO- $d_6$ )

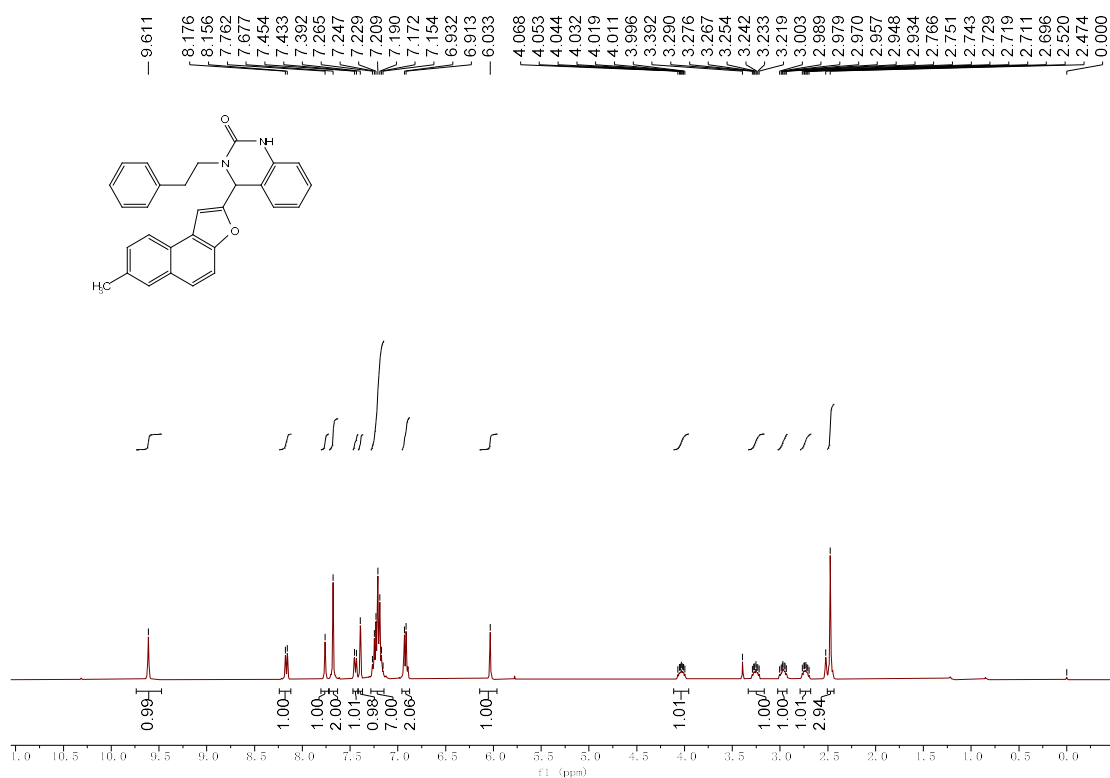

$^{13}\text{C}\{^1\text{H}\}$  NMR spectra of **3n** (100 MHz, DMSO- $d_6$ )

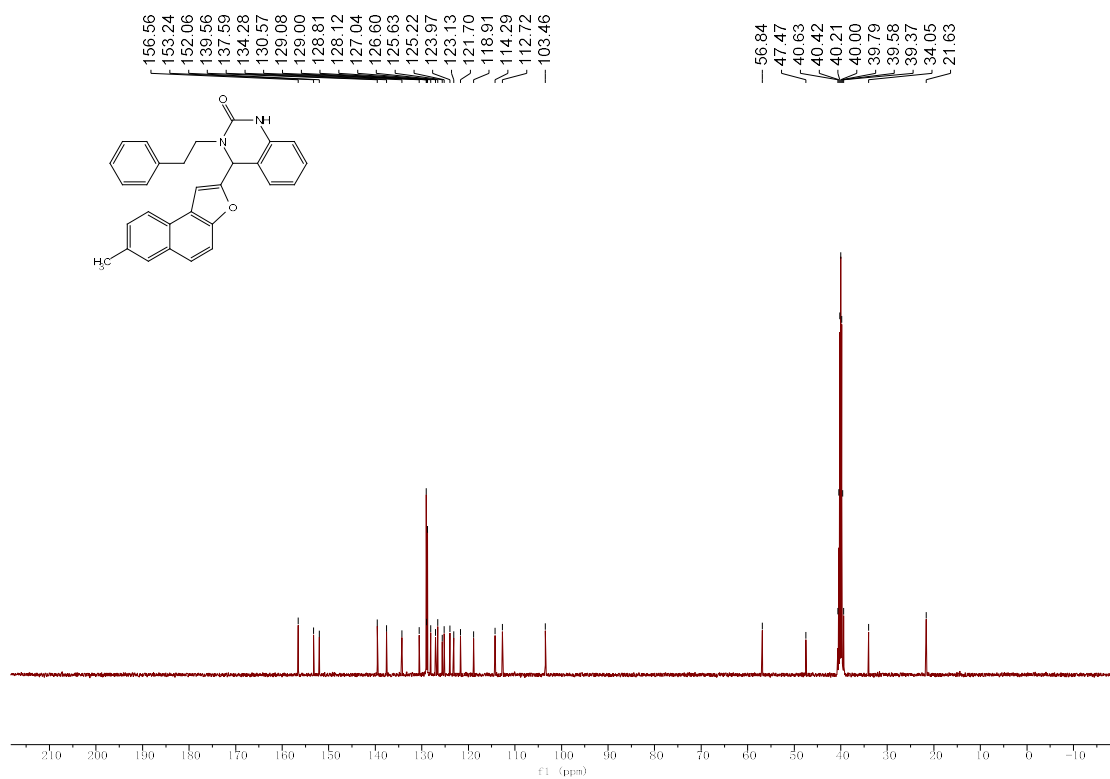

$^1\text{H}$  NMR spectra of **3o** (400 MHz, DMSO- $d_6$ )

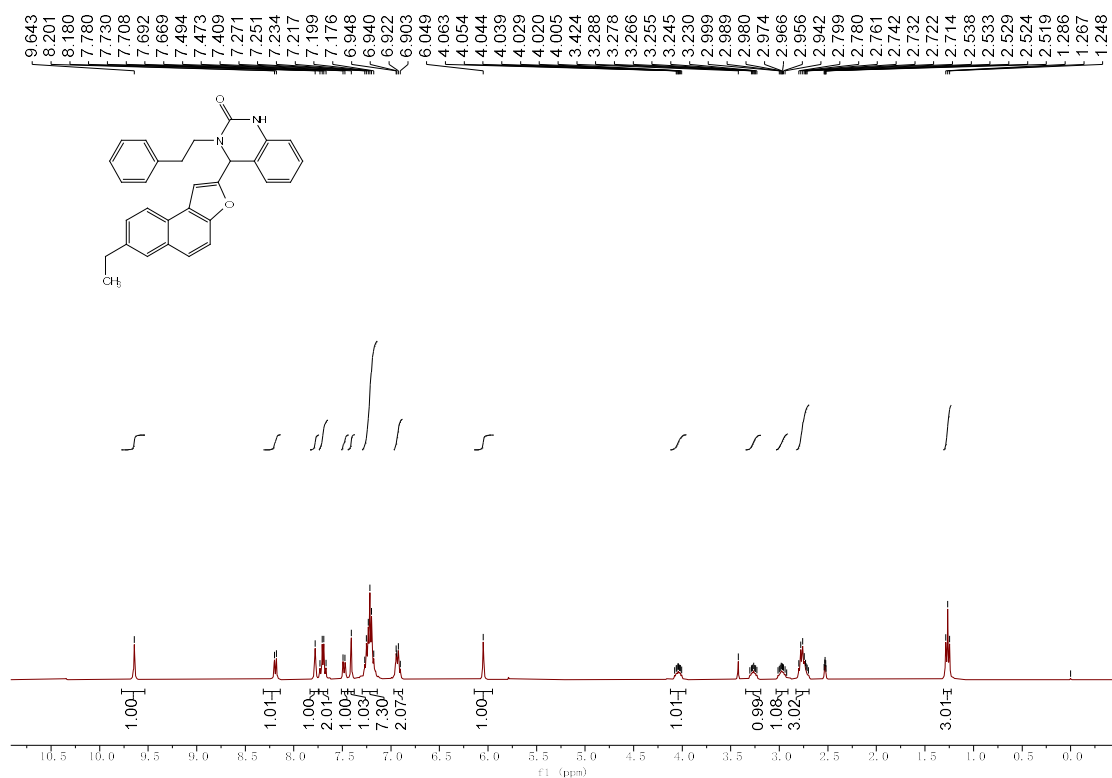

$^{13}\text{C}\{^1\text{H}\}$  NMR spectra of **3o** (100 MHz, DMSO- $d_6$ )

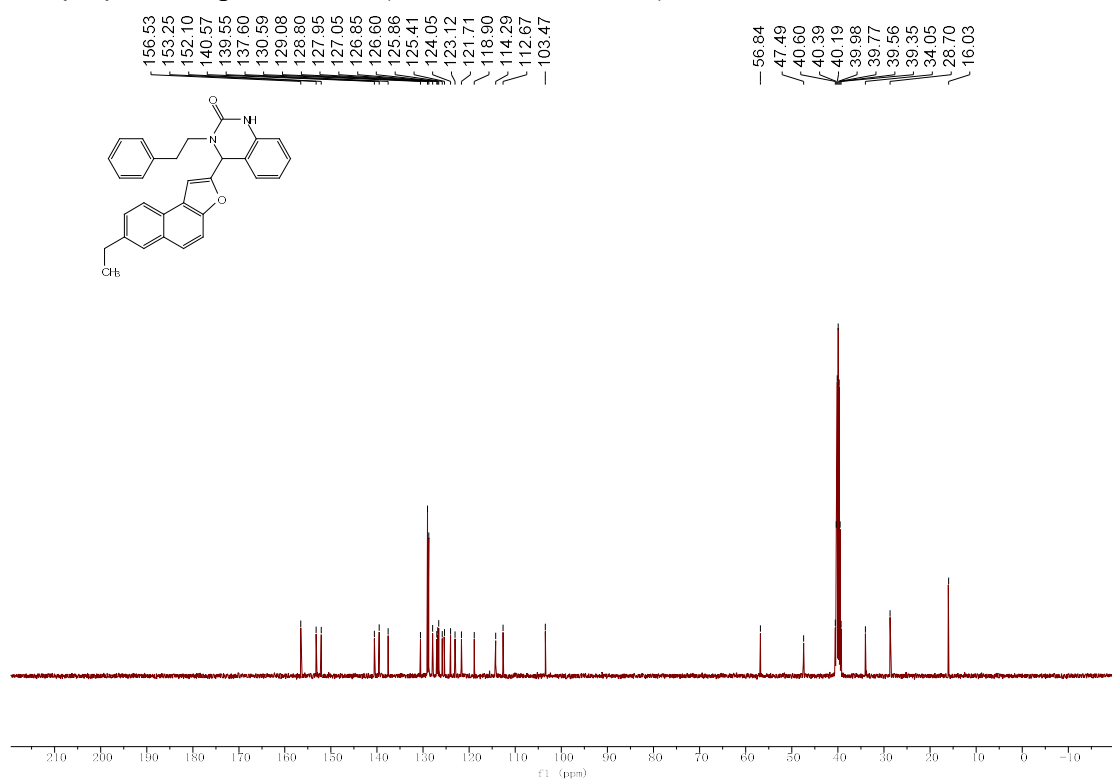

$^1\text{H}$  NMR spectra of **3p** (400 MHz, DMSO- $d_6$ )

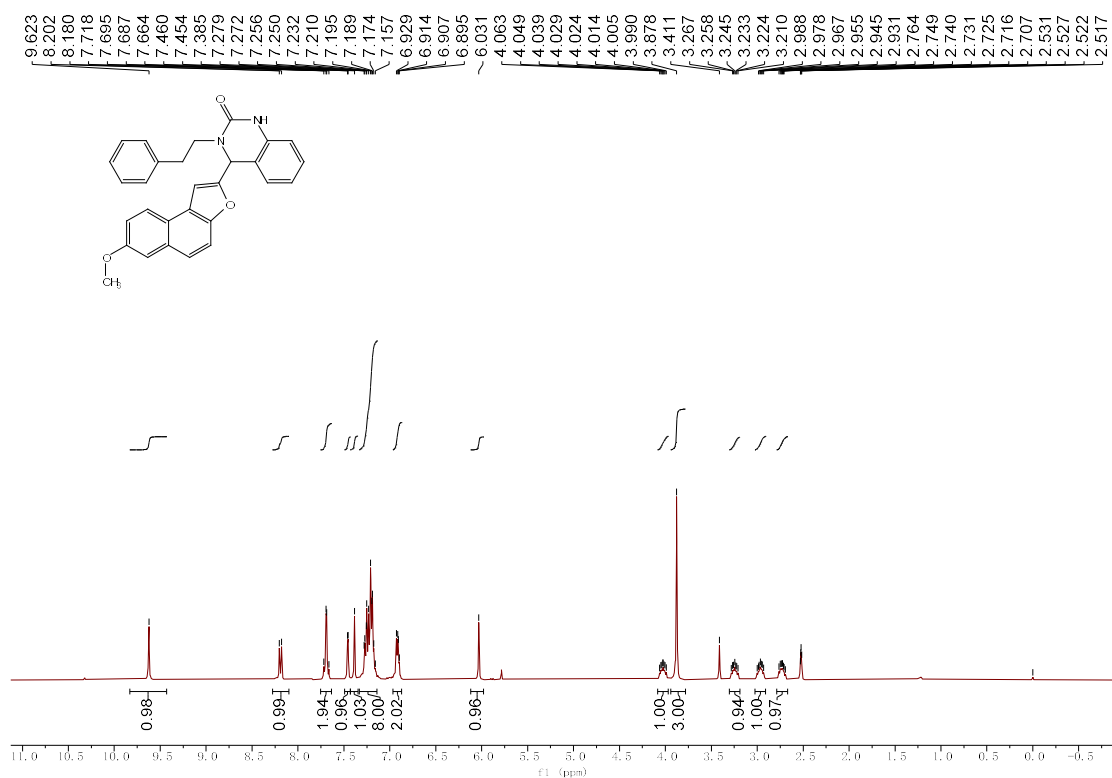

$^{13}\text{C}\{^1\text{H}\}$  NMR spectra of **3p** (100 MHz, DMSO- $d_6$ )

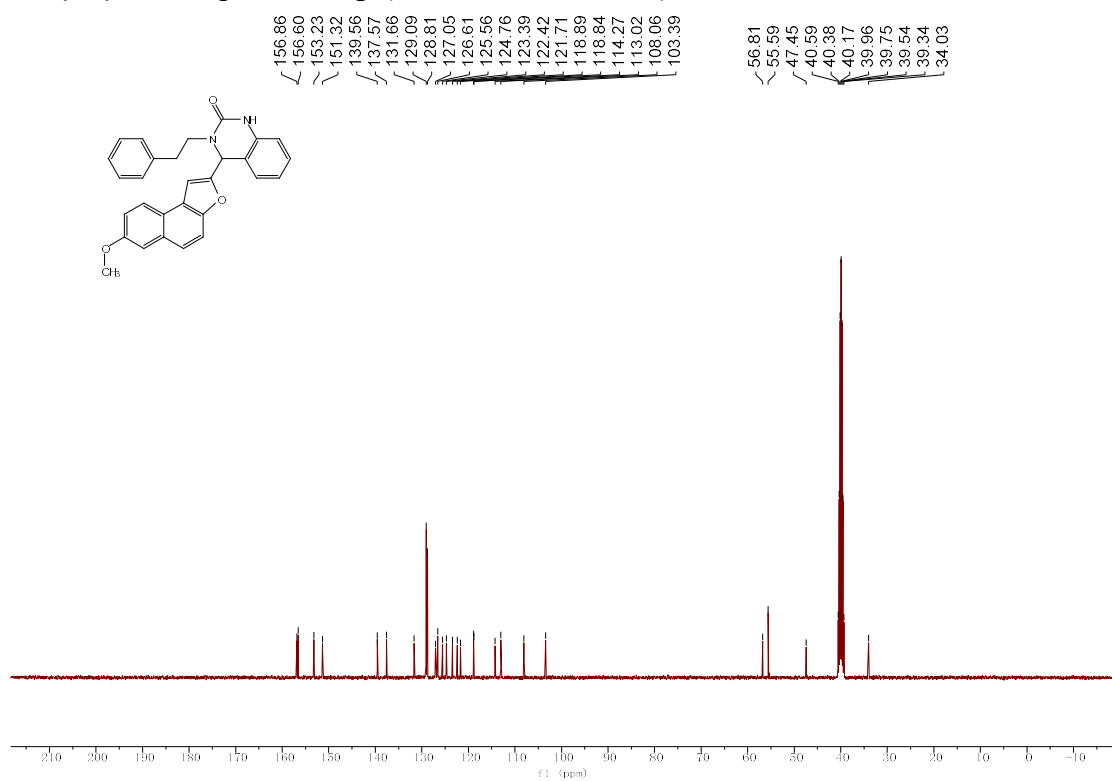

$^1\text{H}$  NMR spectra of **3q** (400 MHz, DMSO- $d_6$ )

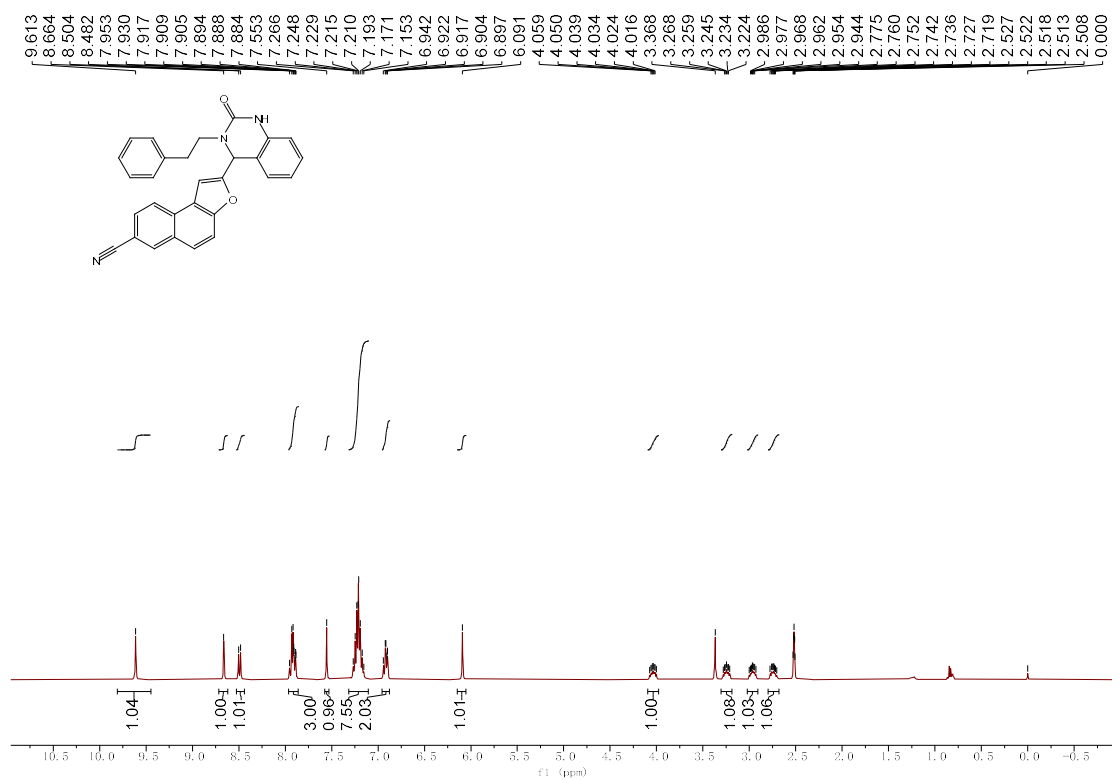

$^{13}\text{C}\{^1\text{H}\}$  NMR spectra of **3q** (100 MHz, DMSO- $d_6$ )

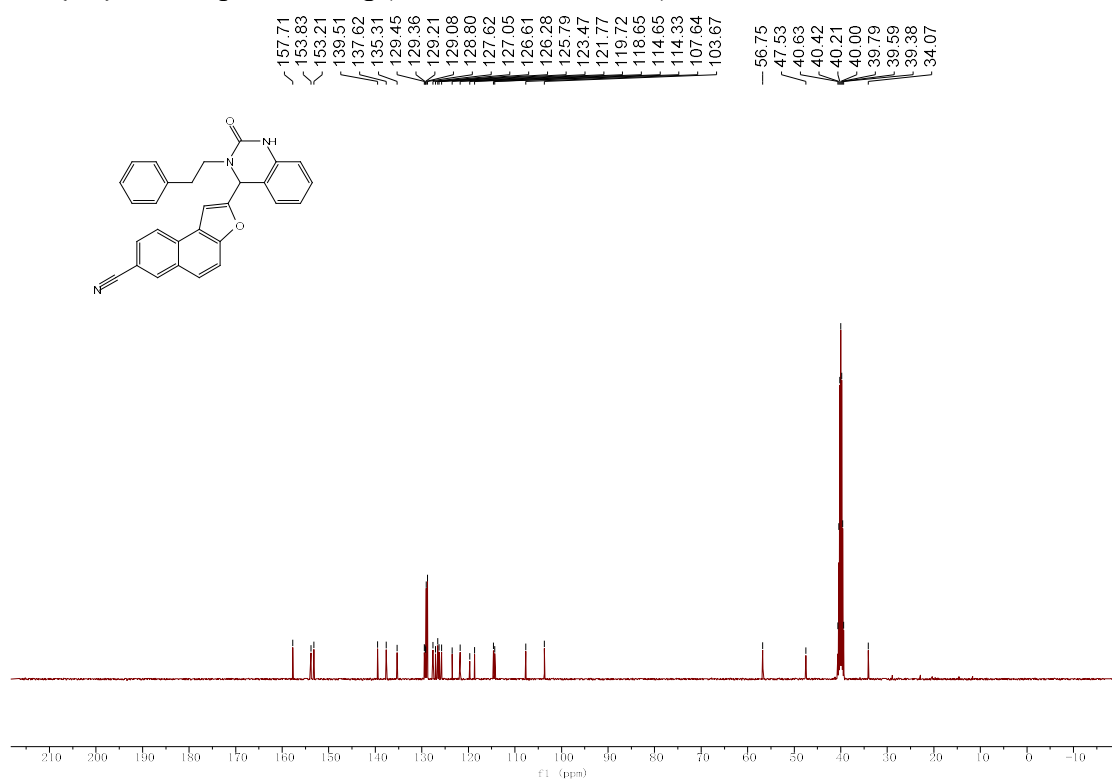

$^1\text{H}$  NMR spectra of **3r** (400 MHz, DMSO- $d_6$ )

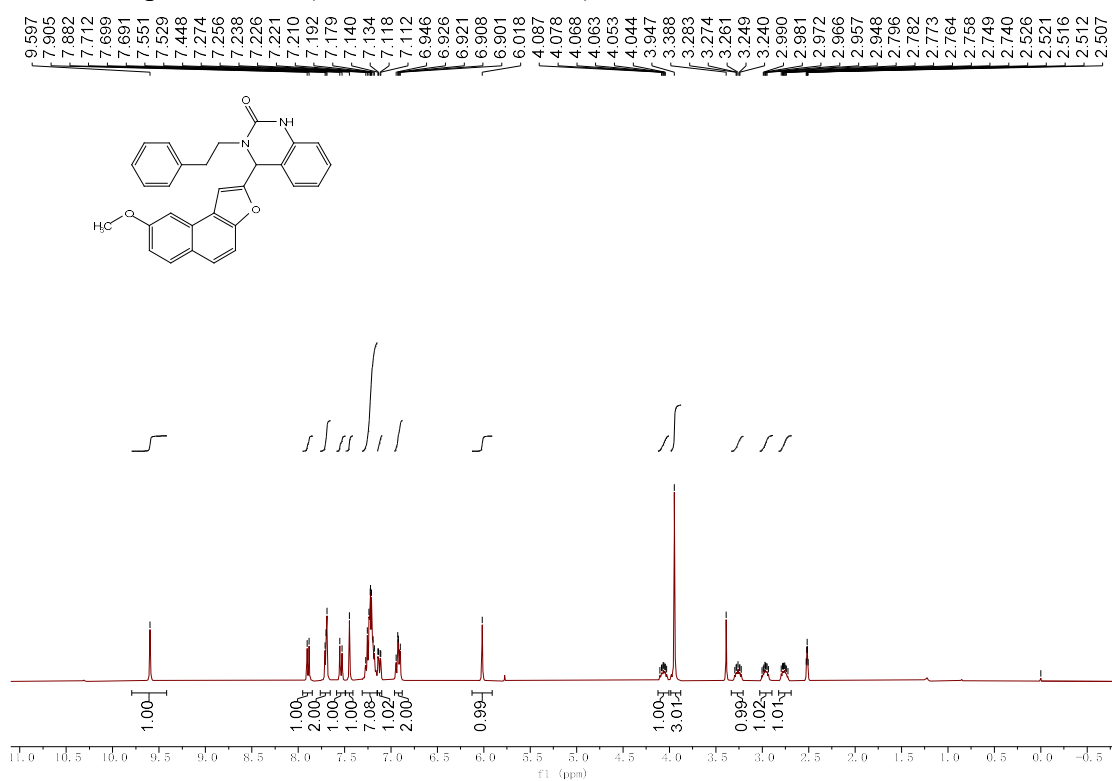

$^{13}\text{C}\{^1\text{H}\}$  NMR spectra of **3r** (100 MHz, DMSO- $d_6$ )

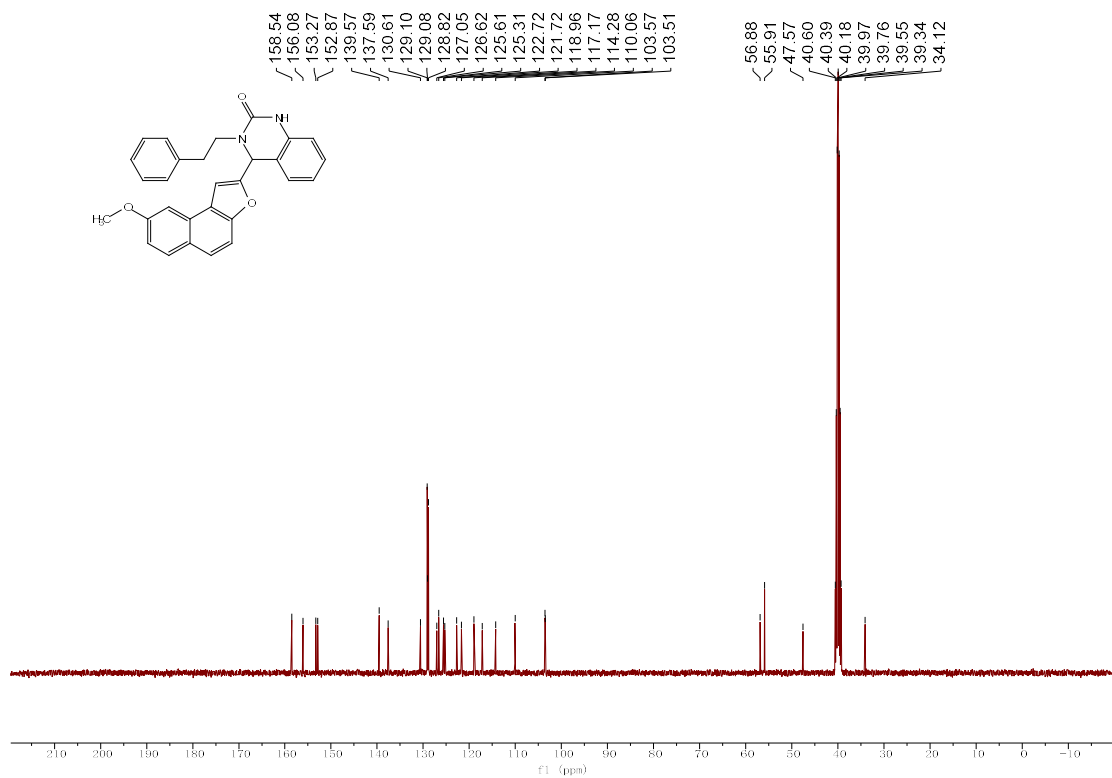

$^1\text{H}$  NMR spectra of **3s** (400 MHz, DMSO- $d_6$ )

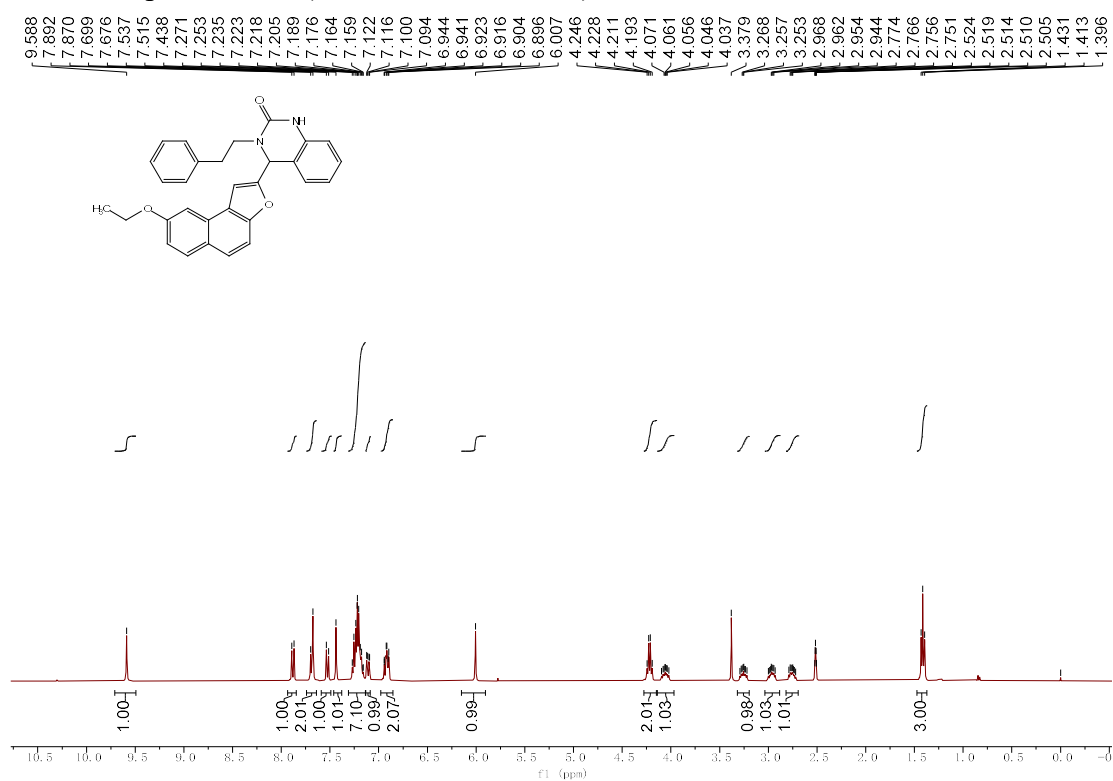

$^{13}\text{C}\{^1\text{H}\}$  NMR spectra of **3s** (100 MHz, DMSO- $d_6$ )

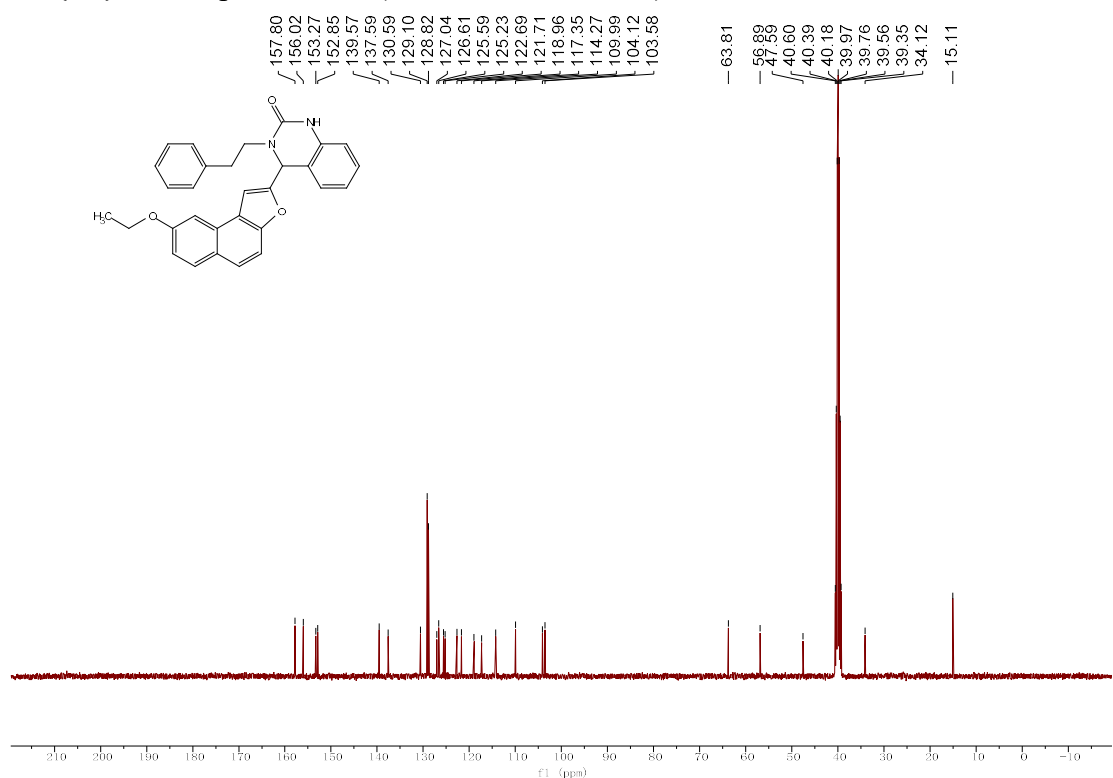



$^1\text{H}$  NMR spectra of **3t** (400 MHz, DMSO- $d_6$ )

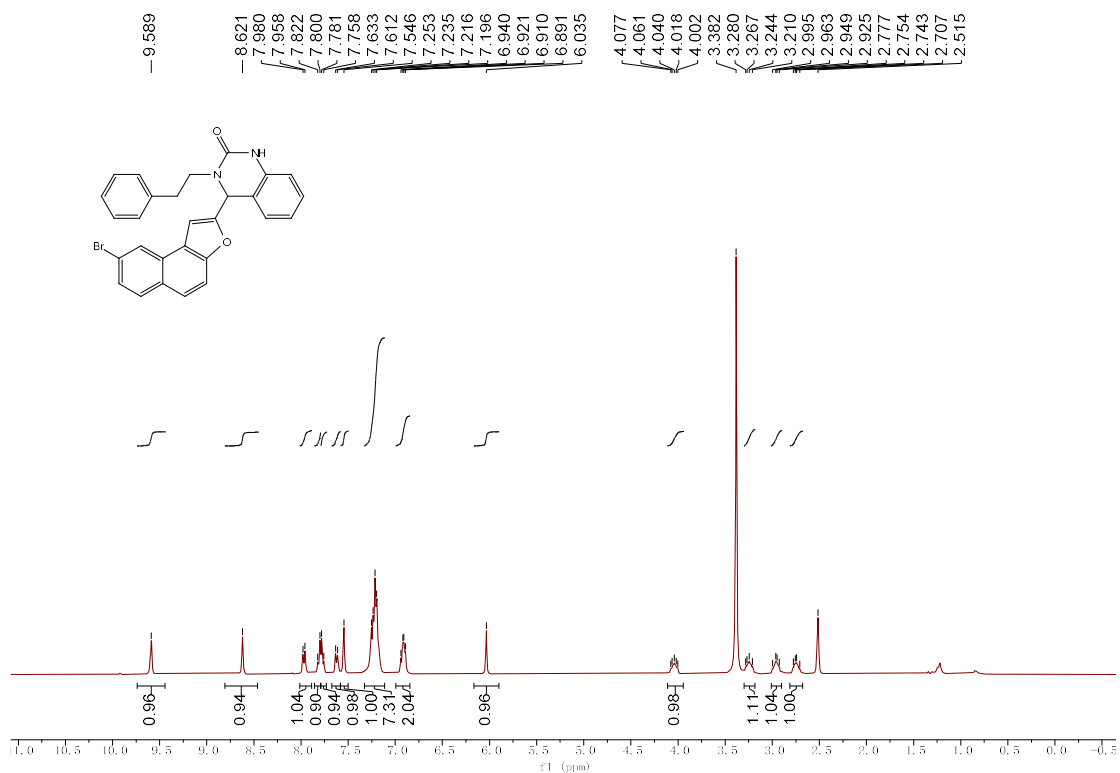

$^{13}\text{C}\{^1\text{H}\}$  NMR spectra of **3t** (100 MHz, DMSO- $d_6$ )

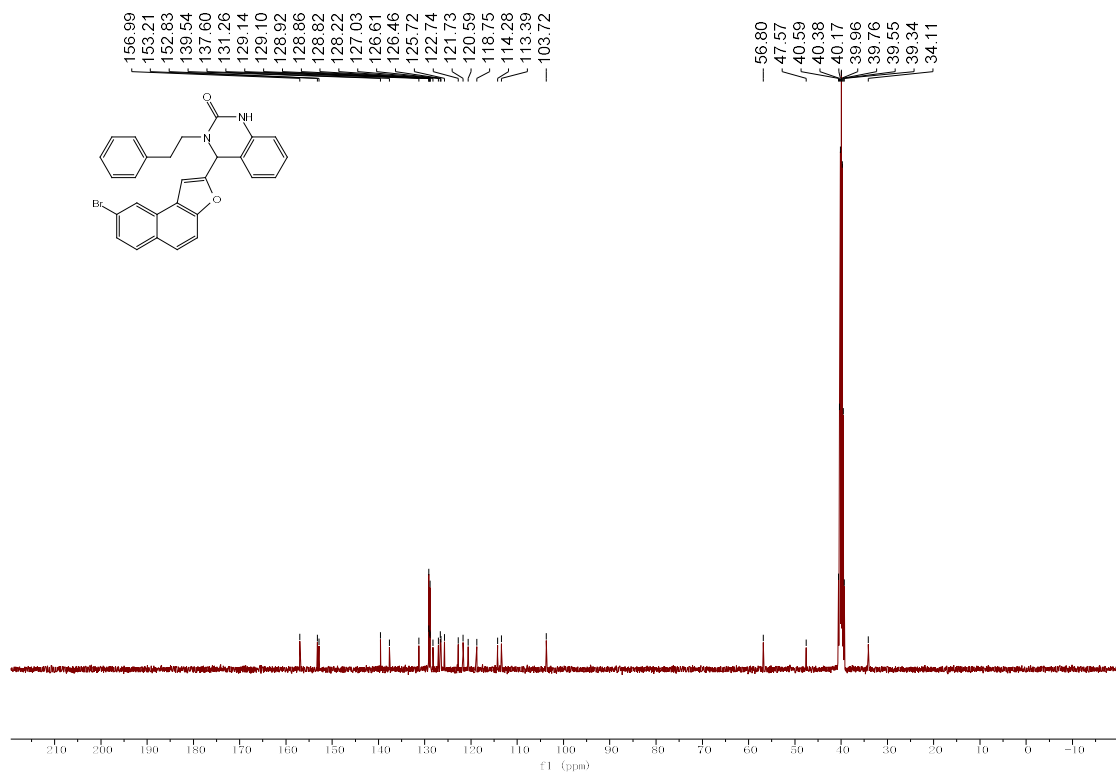

$^1\text{H}$  NMR spectra of **3u** (400 MHz, DMSO- $d_6$ )

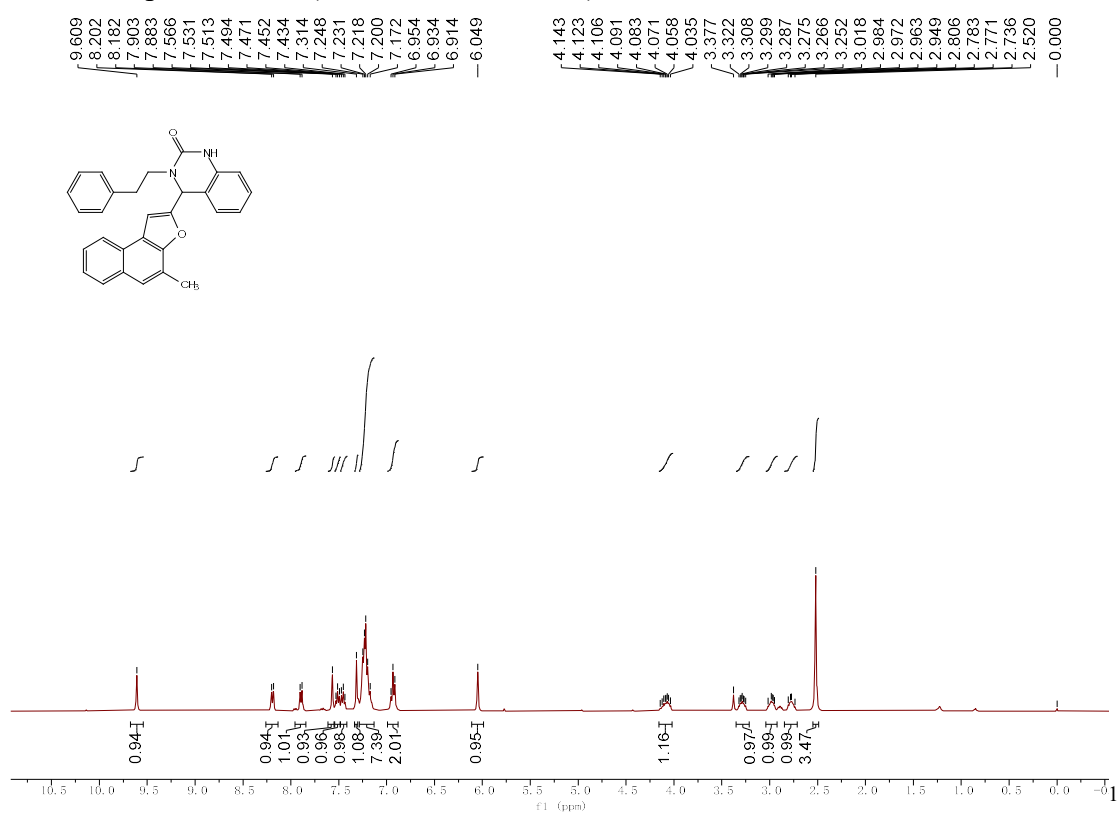

$^{13}\text{C}\{^1\text{H}\}$  NMR spectra of **3u** (100 MHz, DMSO- $d_6$ )

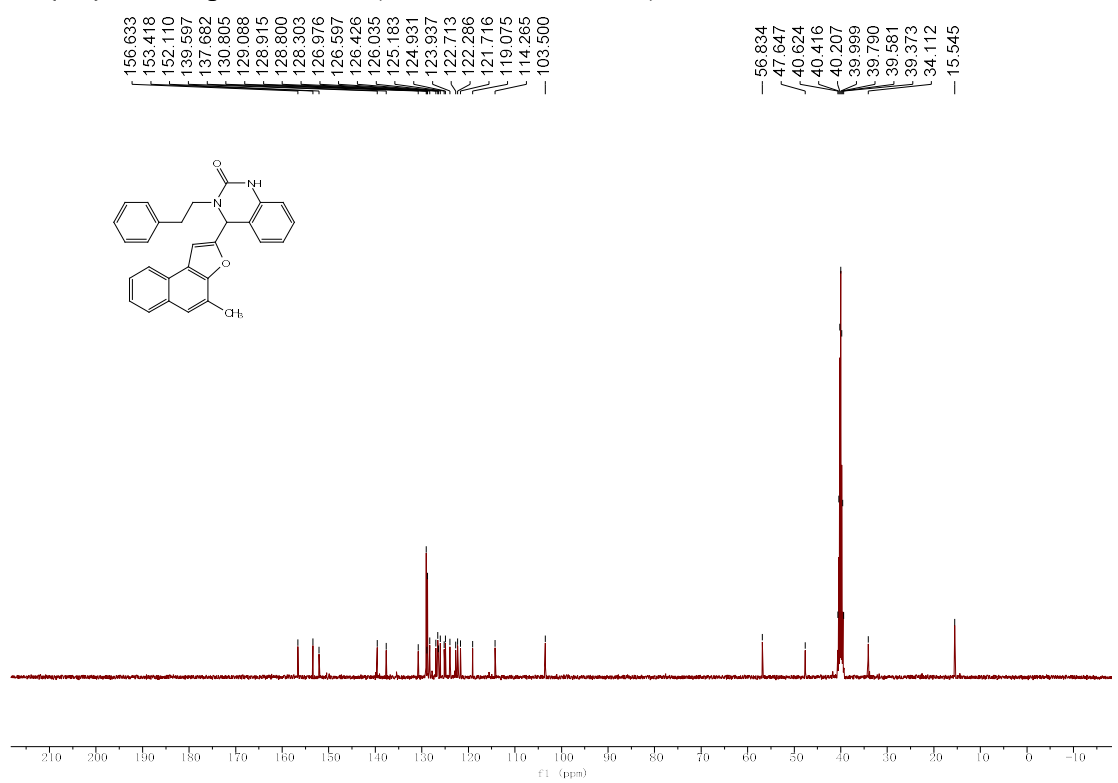

$^1\text{H}$  NMR spectra of **3v** (400 MHz, DMSO- $d_6$ )

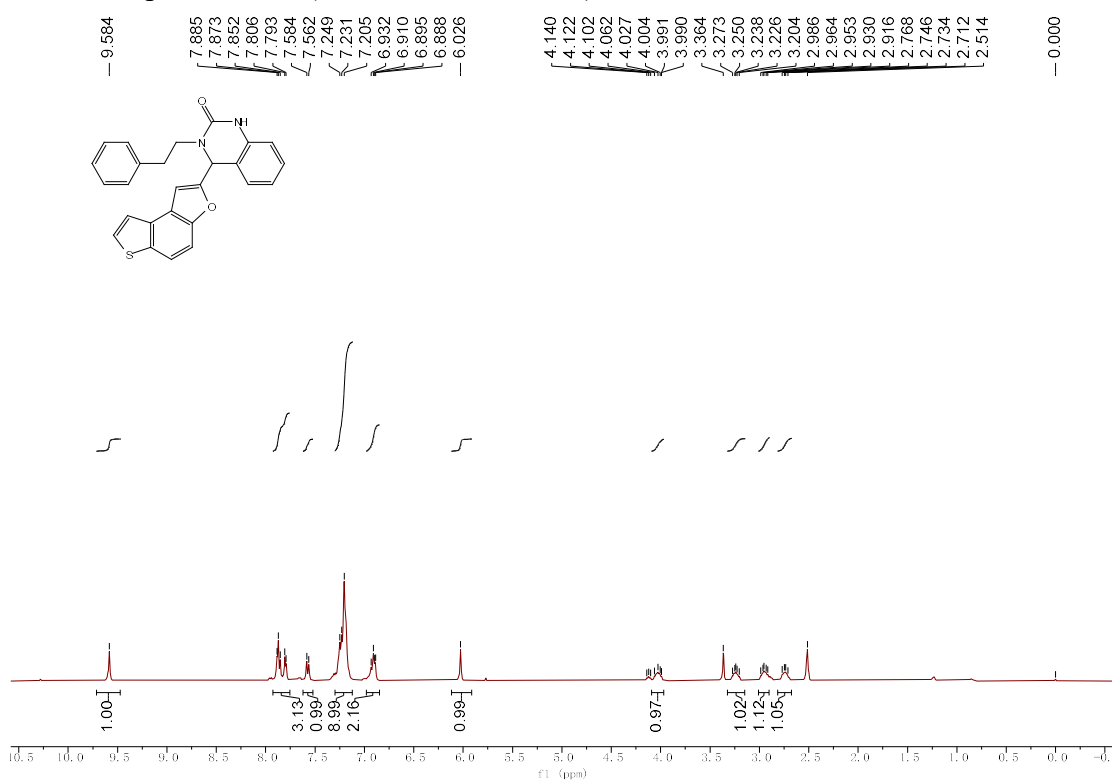

$^{13}\text{C}\{^1\text{H}\}$  NMR spectra of **3v** (100 MHz, DMSO- $d_6$ )

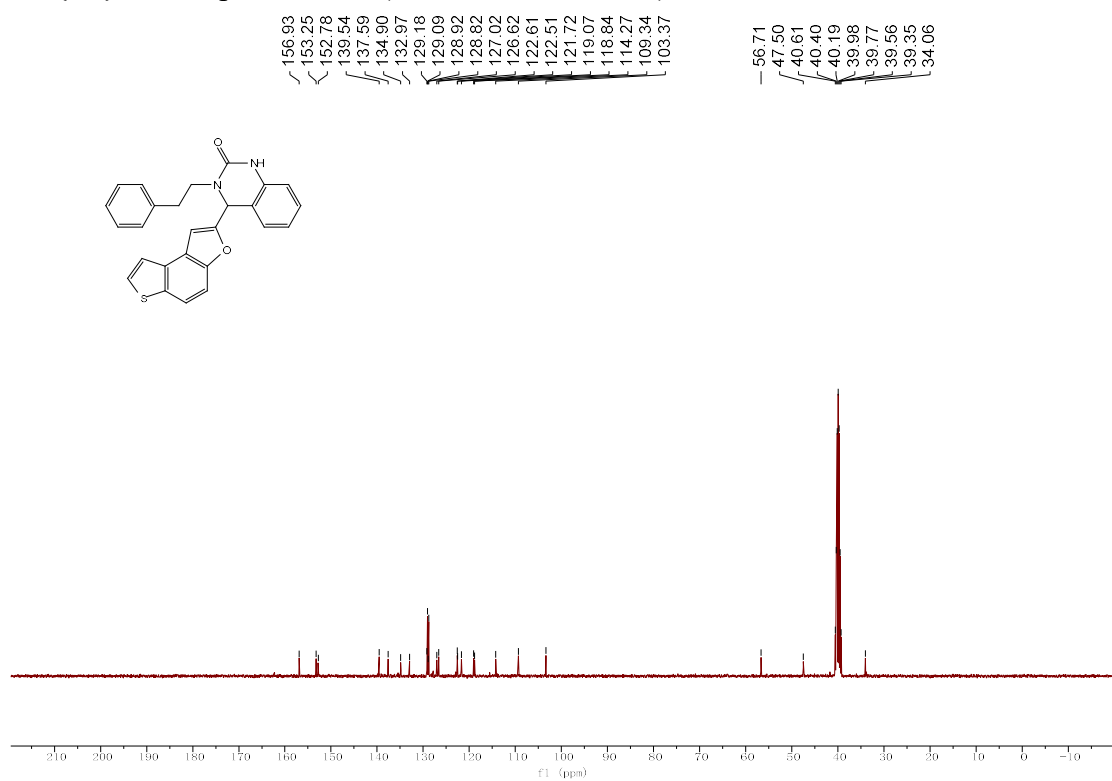

$^1\text{H}$  NMR spectra of **3w** (400 MHz,  $\text{CDCl}_3$ )

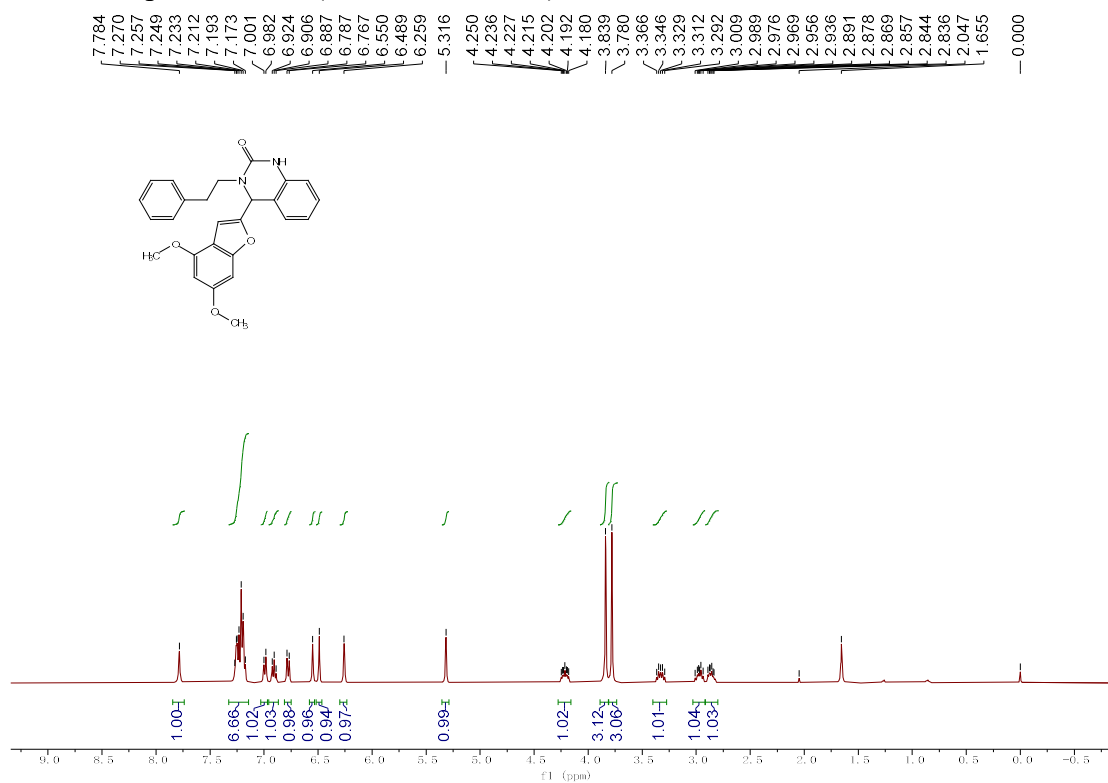

$^{13}\text{C}\{^1\text{H}\}$  NMR spectra of **3w** (100 MHz,  $\text{CDCl}_3$ )

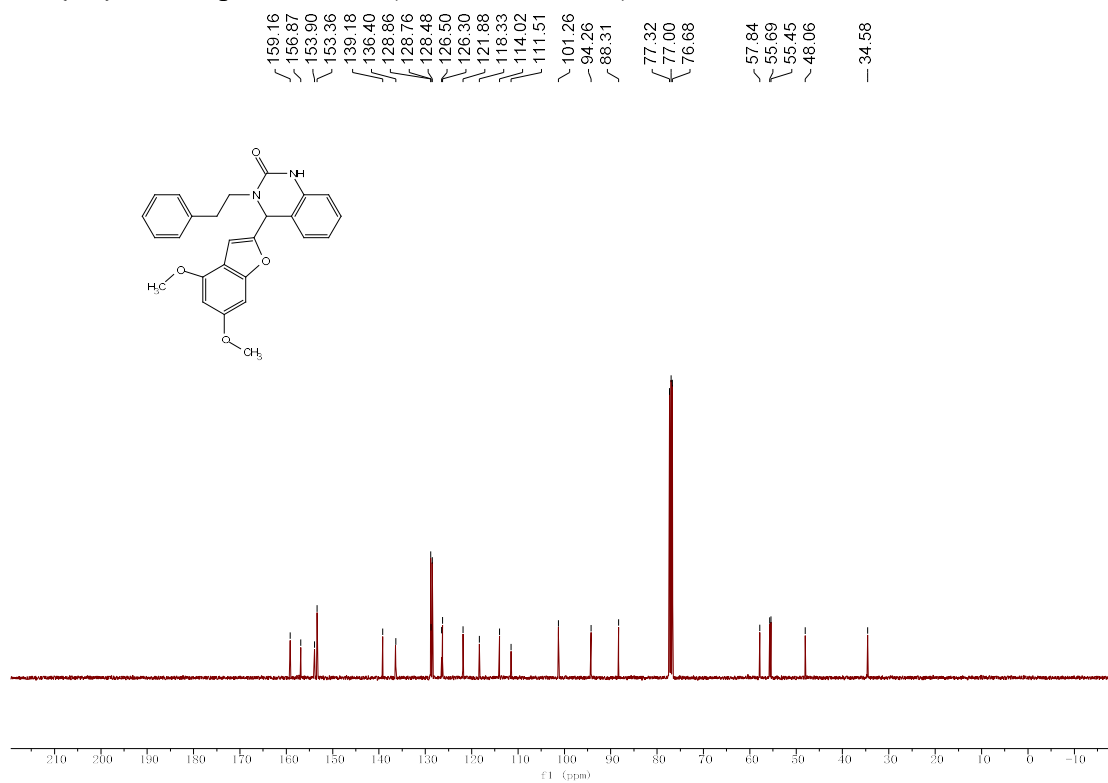

$^1\text{H}$  NMR spectra of **5a** (400 MHz, DMSO- $d_6$ )

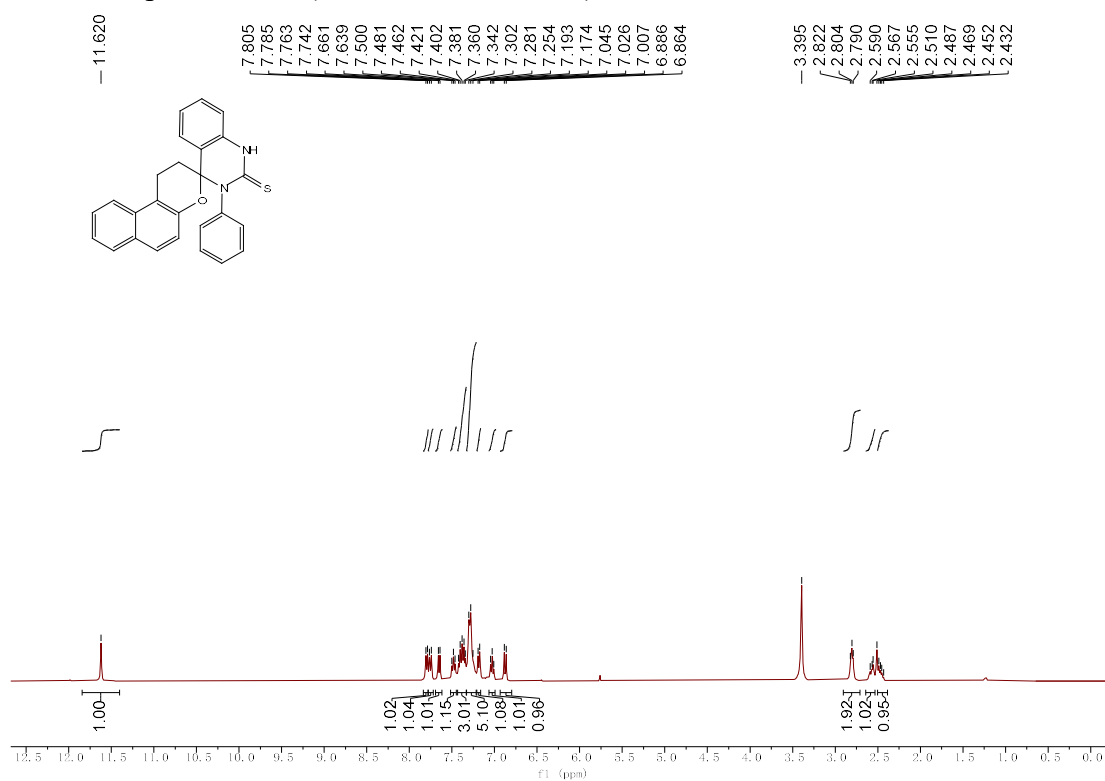

$^{13}\text{C}\{^1\text{H}\}$  NMR spectra of **5a** (100 MHz, DMSO- $d_6$ )

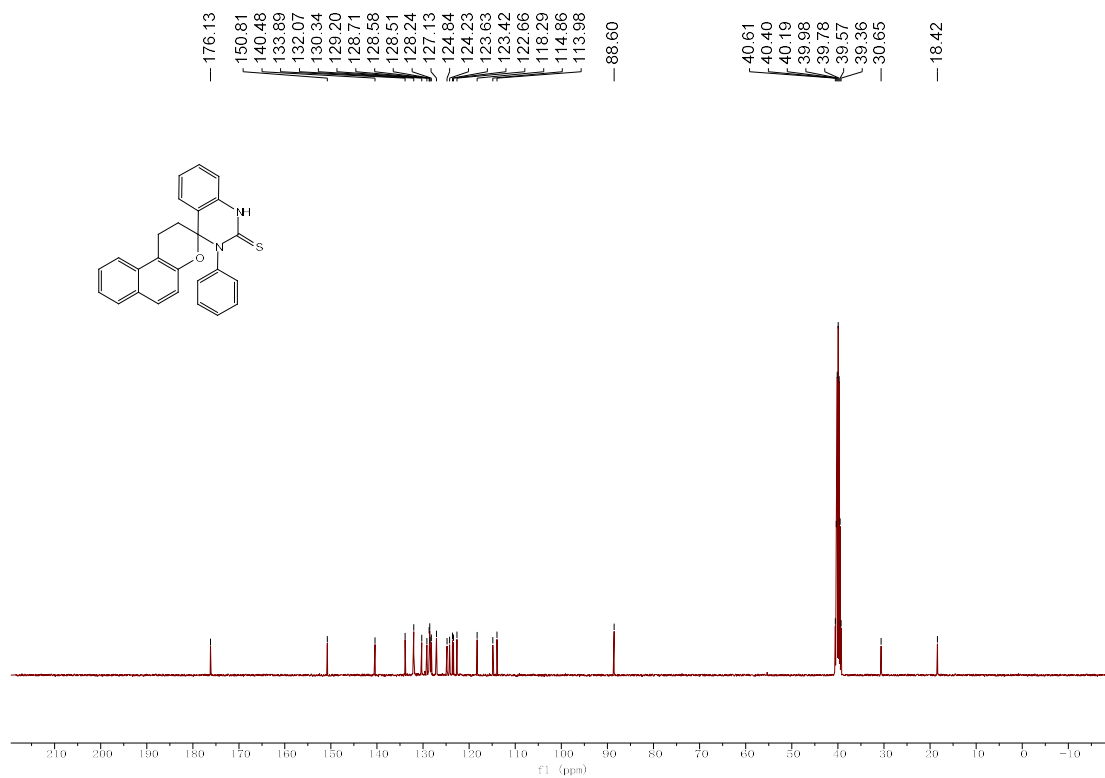

$^1\text{H}$  NMR spectra of **5b** (400 MHz, DMSO- $d_6$ )

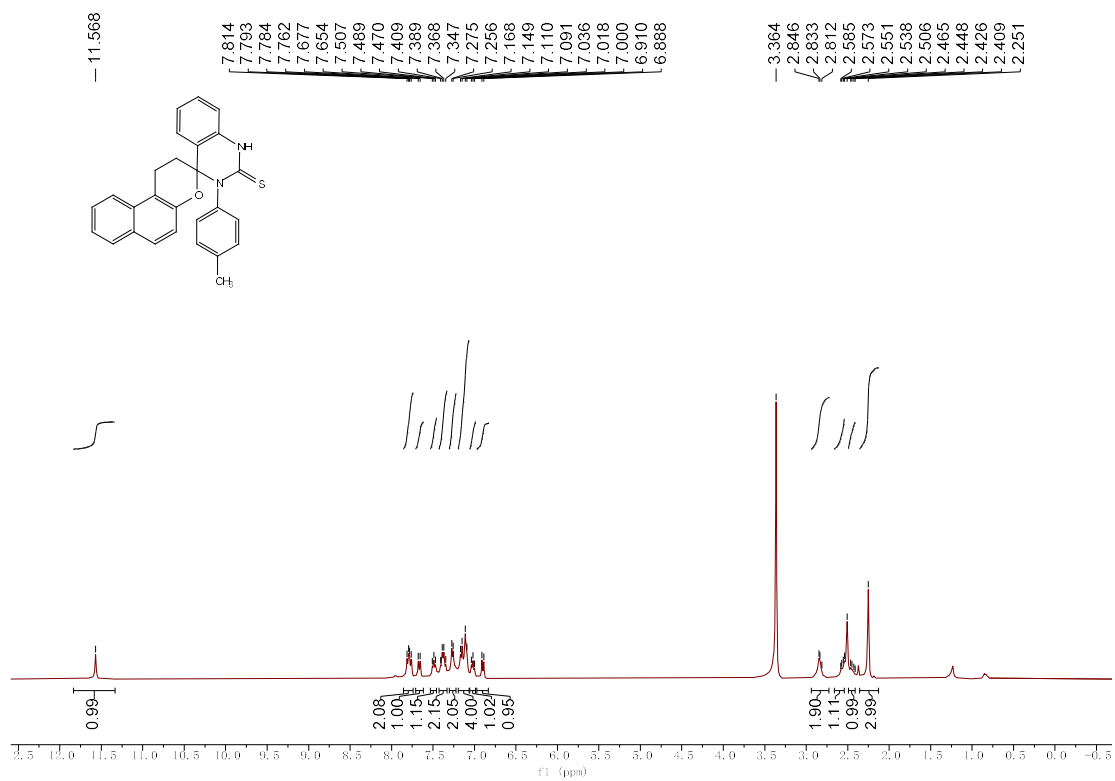

$^{13}\text{C}\{^1\text{H}\}$  NMR spectra of **5b** (100 MHz, DMSO- $d_6$ )

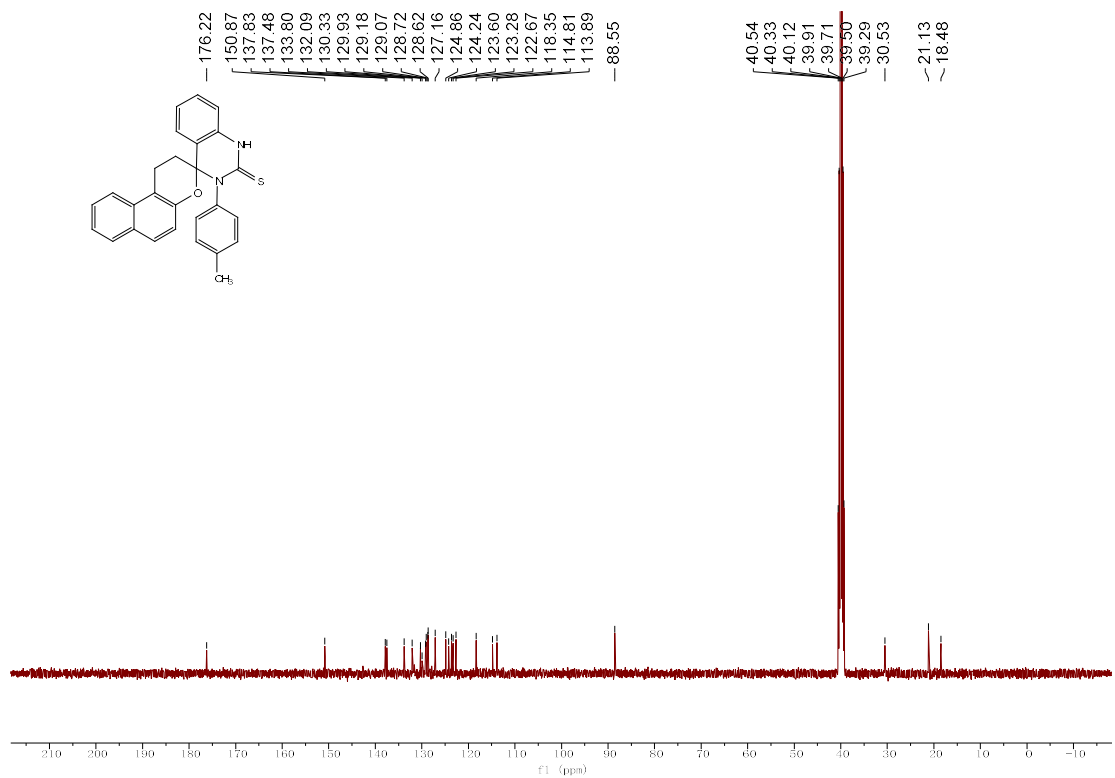

$^1\text{H}$  NMR spectra of **5c** (400 MHz, DMSO- $d_6$ )

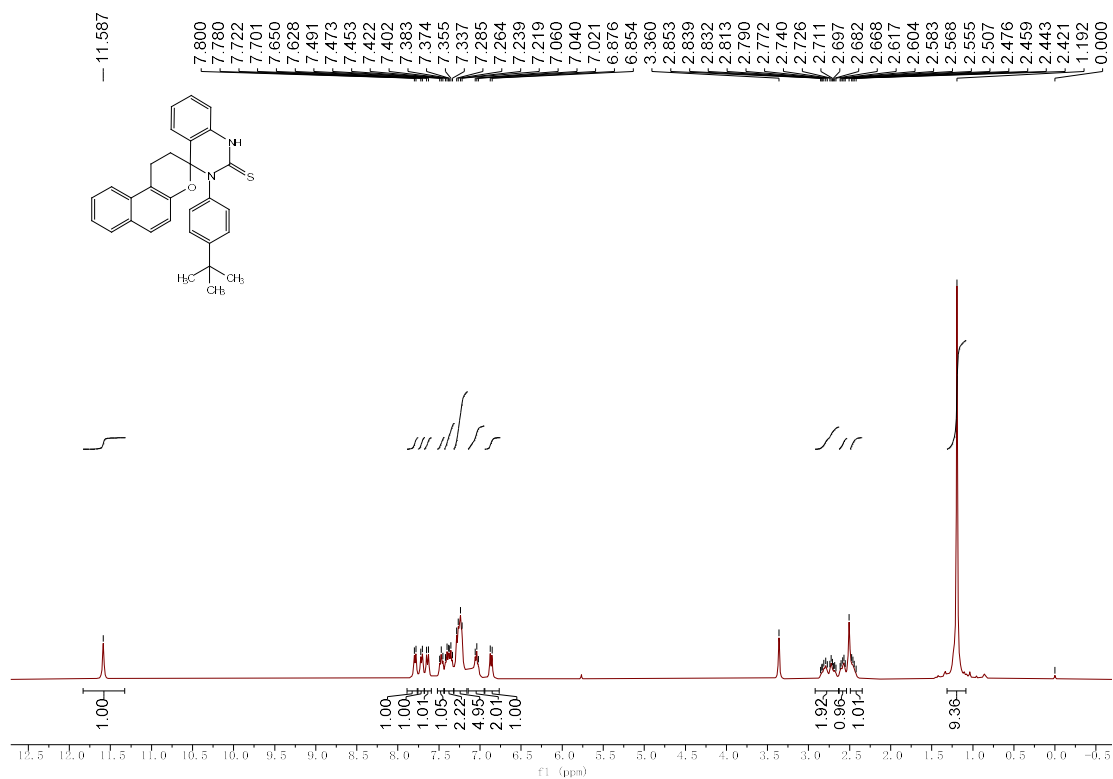

$^{13}\text{C}\{^1\text{H}\}$  NMR spectra of **5c** (100 MHz, DMSO- $d_6$ )

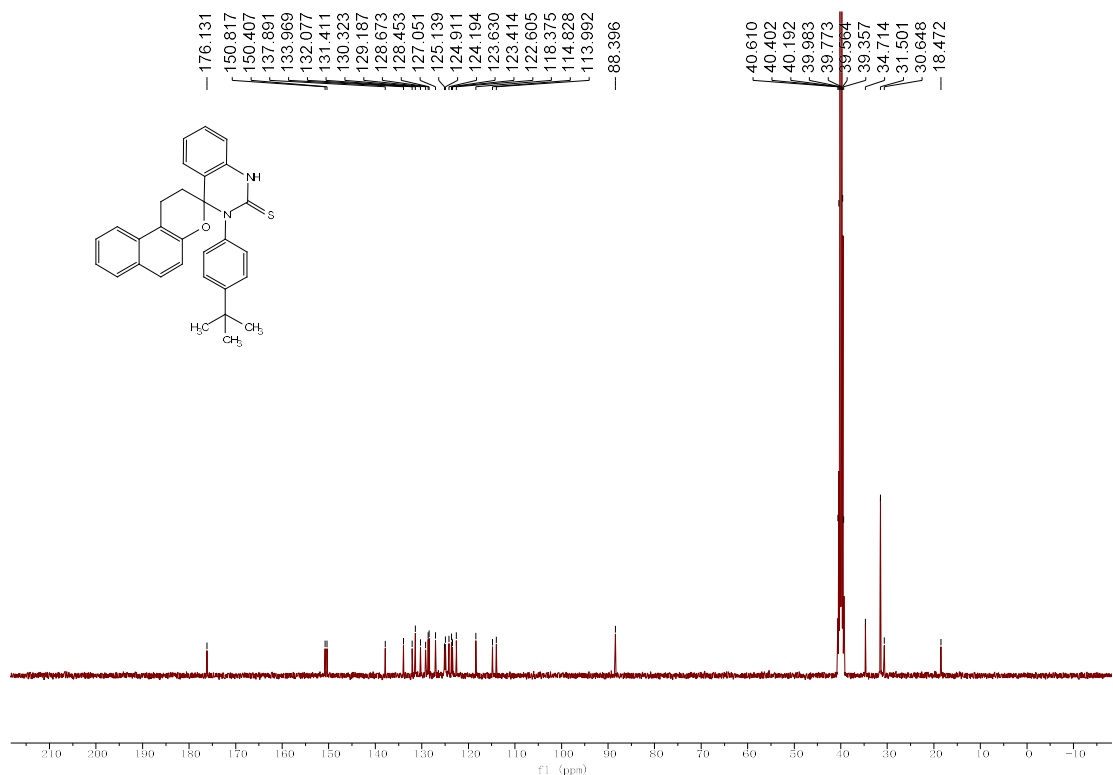

$^1\text{H}$  NMR spectra of **5d** (400 MHz, DMSO- $d_6$ )

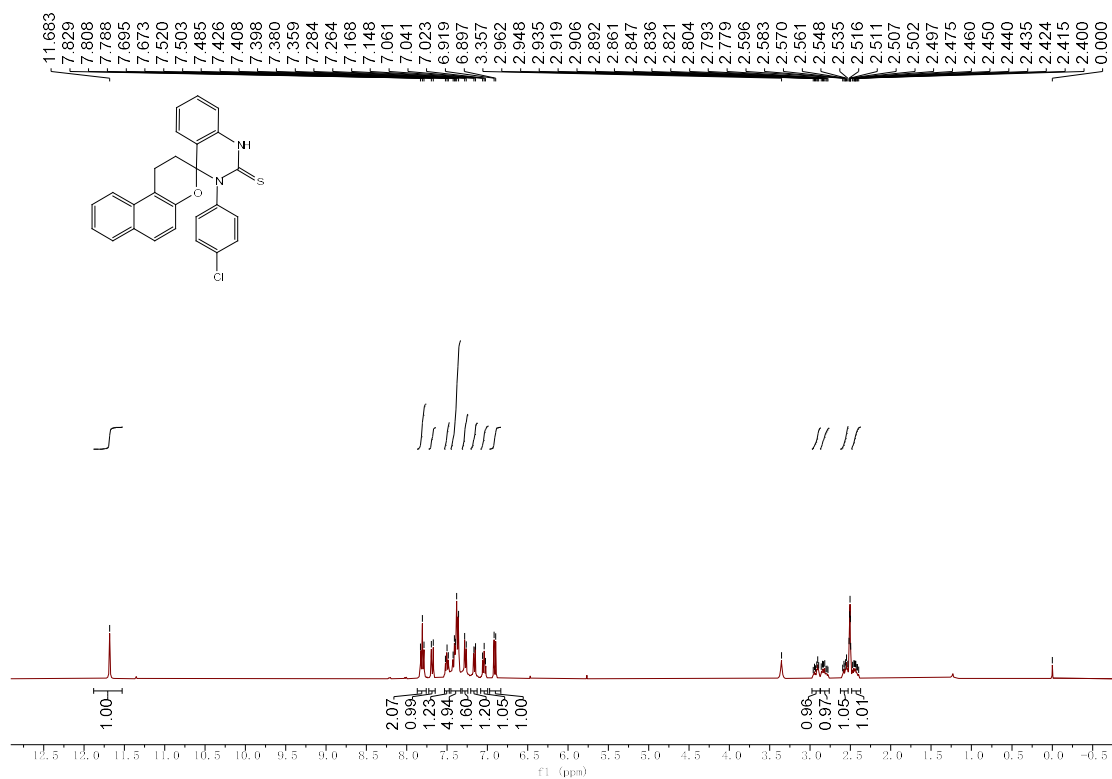

$^{13}\text{C}\{^1\text{H}\}$  NMR spectra of **5d** (100 MHz, DMSO- $d_6$ )

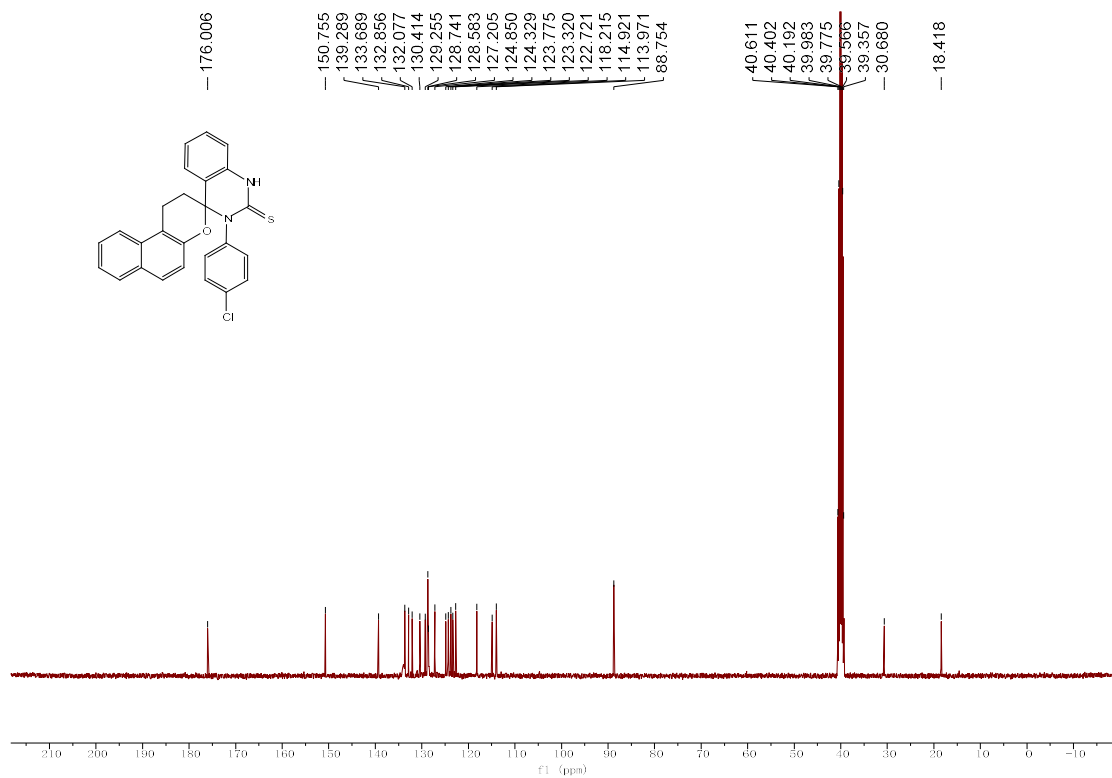



$^1\text{H}$  NMR spectra of **5e** (400 MHz, DMSO- $d_6$ )

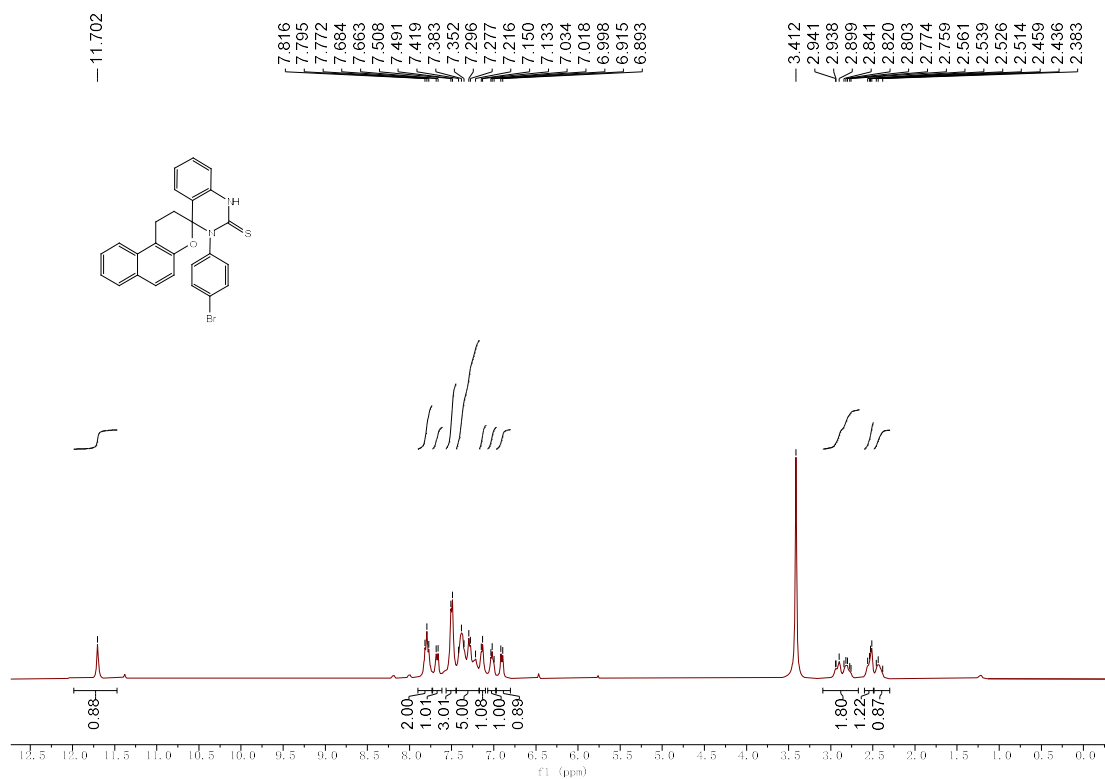

$^{13}\text{C}\{^1\text{H}\}$  NMR spectra of **5e** (100 MHz, DMSO- $d_6$ )

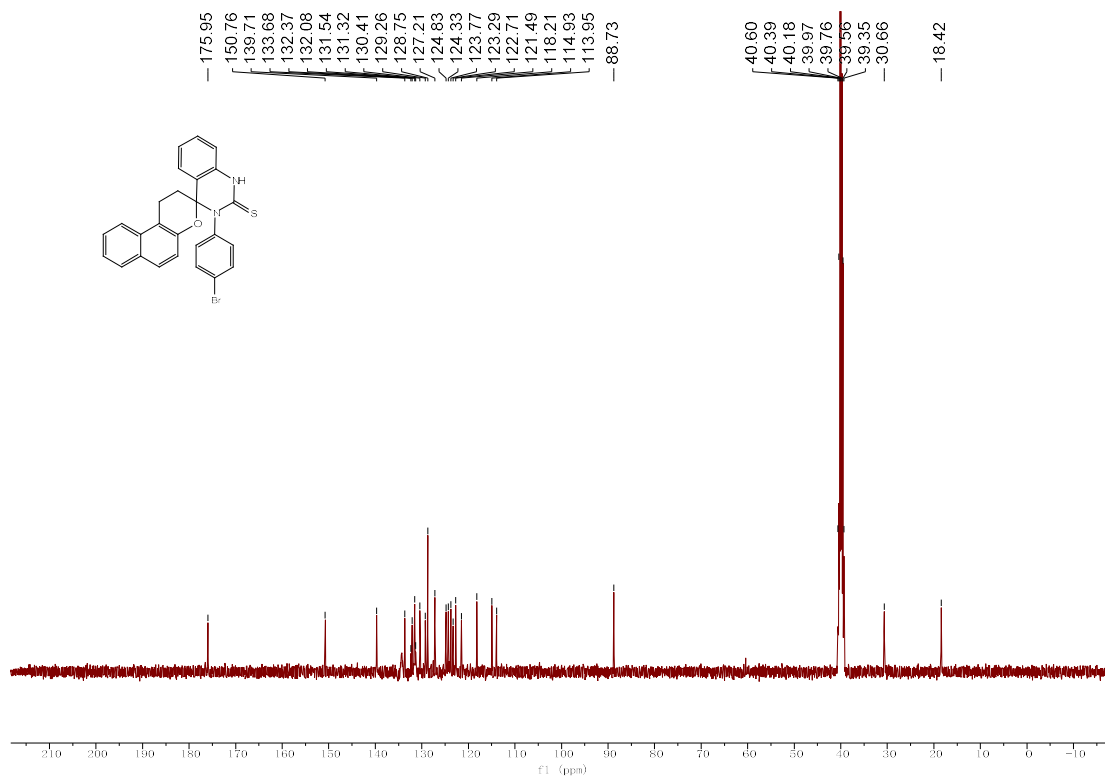

$^1\text{H}$  NMR spectra of **5f** (400 MHz, DMSO- $d_6$ )

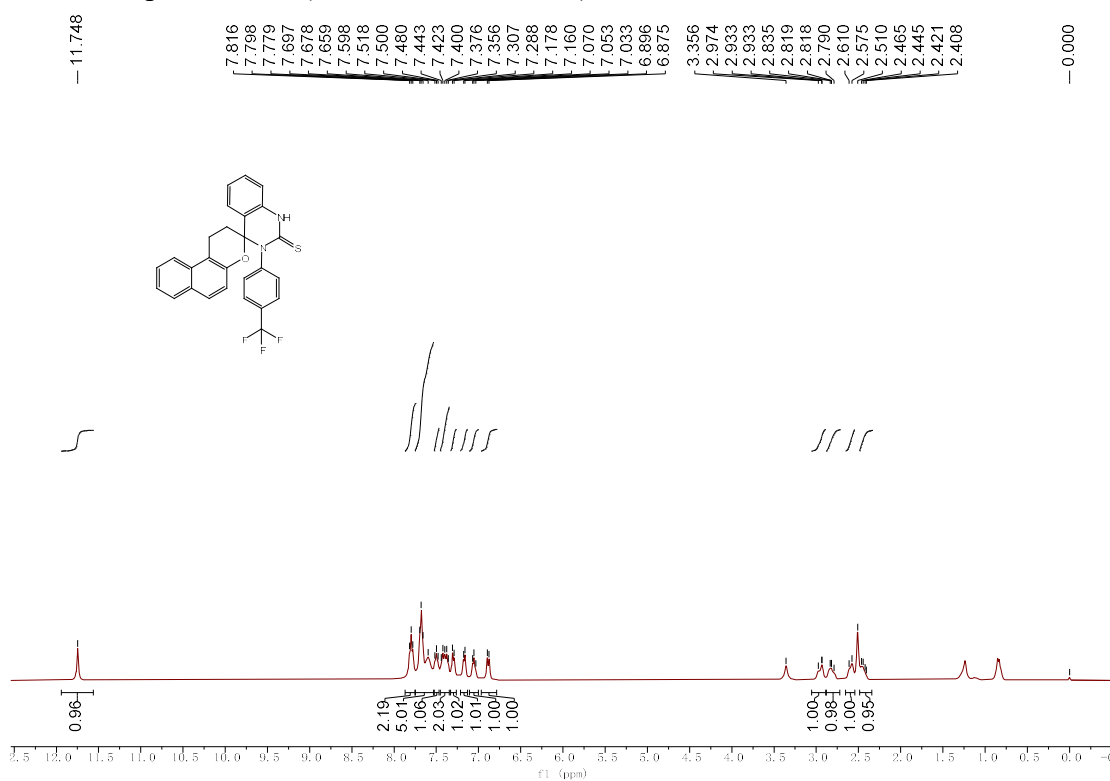

$^{13}\text{C}\{^1\text{H}\}$  NMR spectra of **5f** (100 MHz, DMSO- $d_6$ )

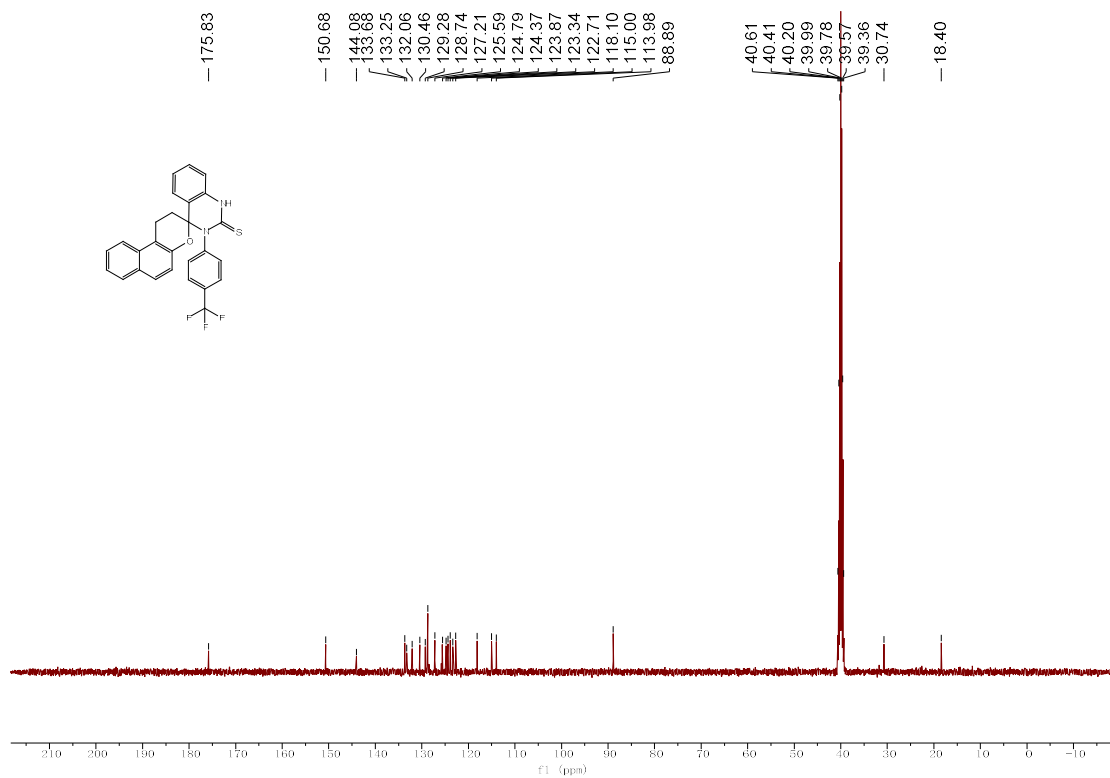

$^{19}\text{F}\{^1\text{H}\}$  NMR spectra of **5f** (377 MHz, DMSO- $d_6$ )

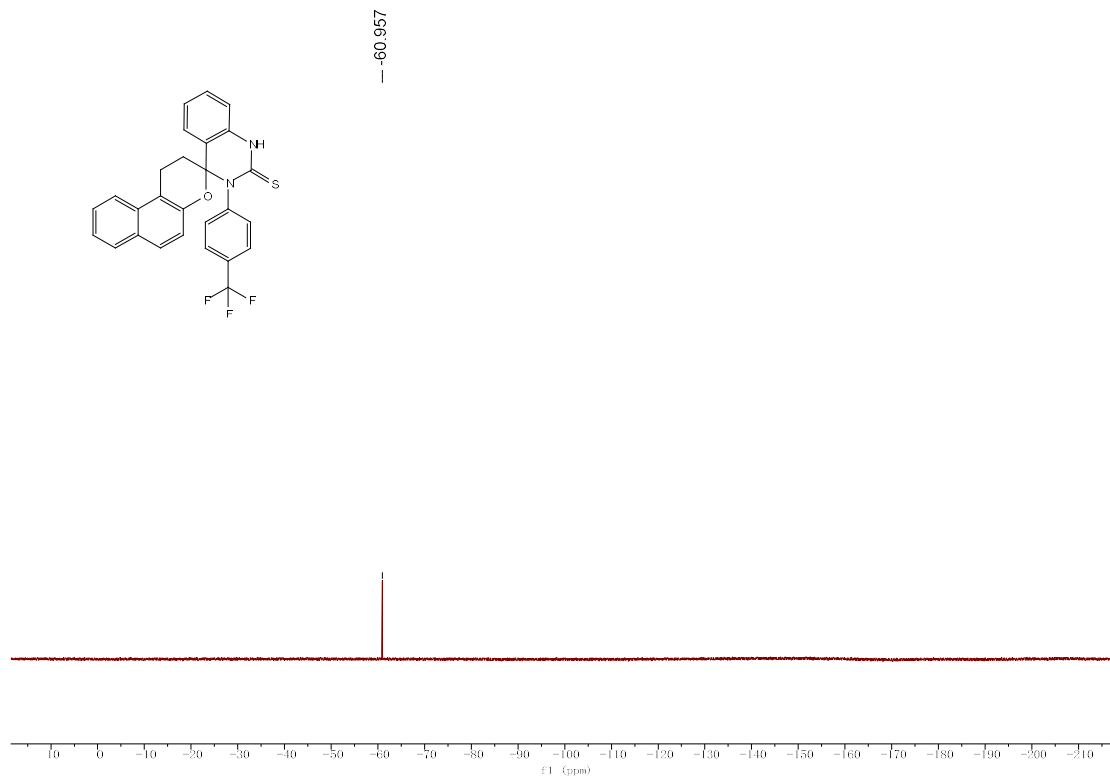

$^1\text{H}$  NMR spectra of **5g** (400 MHz, DMSO- $d_6$ )

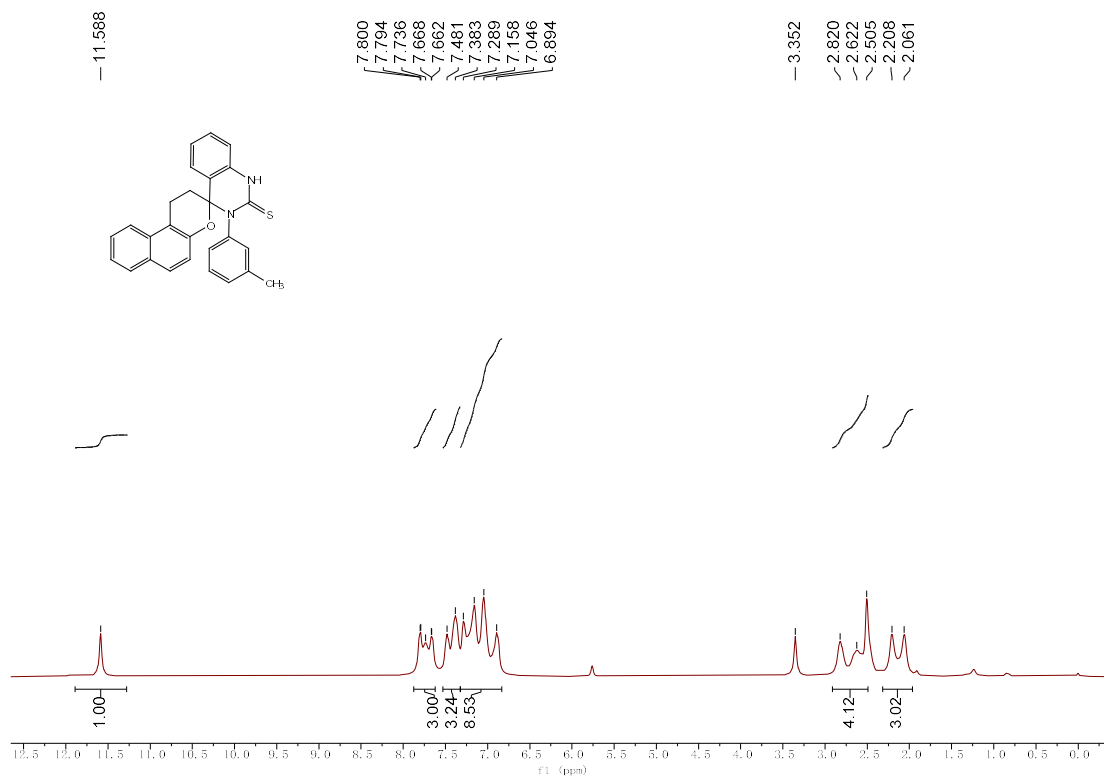

$^{13}\text{C}\{^1\text{H}\}$  NMR spectra of **5g** (100 MHz, DMSO- $d_6$ )

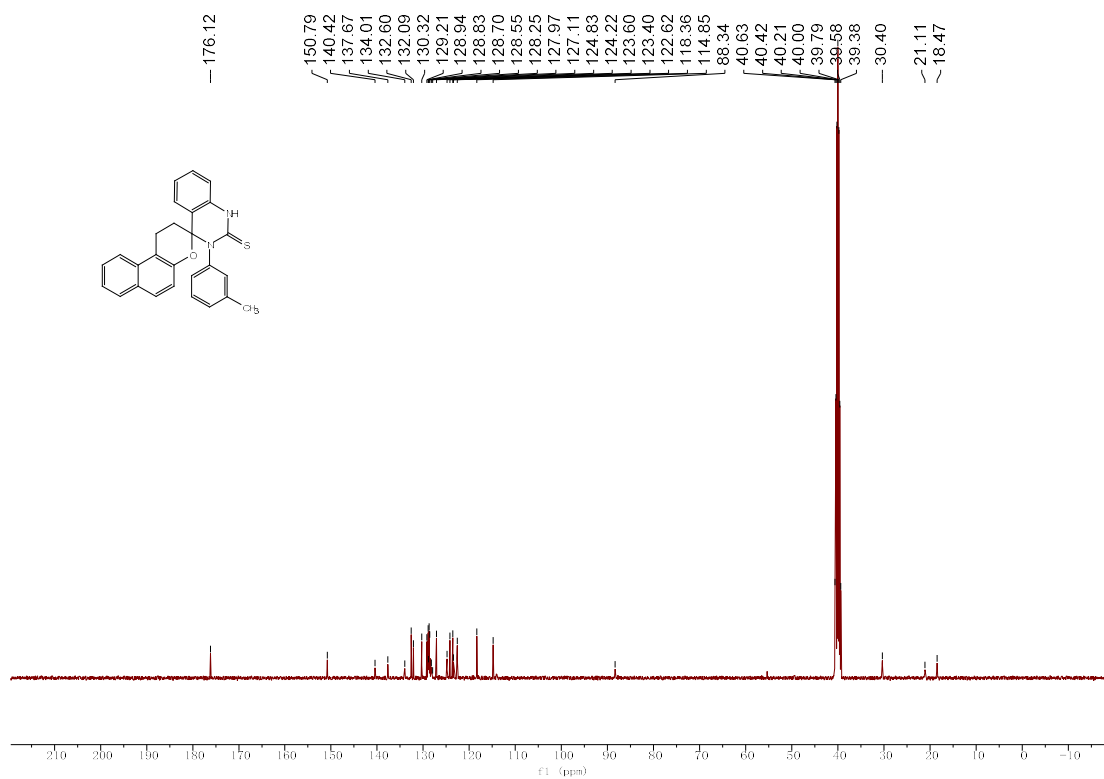

### $^1\text{H}$ NMR spectra of **5h** (400 MHz, DMSO- $d_6$ )

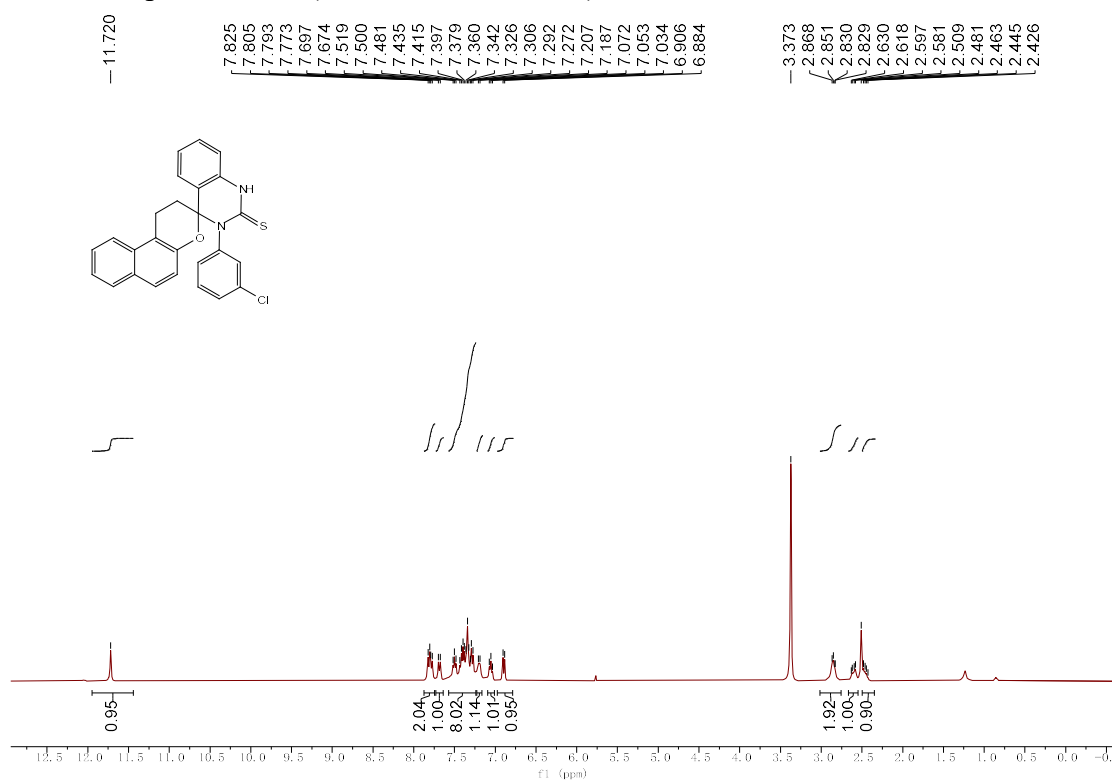

### $^{13}\text{C}\{^1\text{H}\}$ NMR spectra of **5h** (100 MHz, DMSO- $d_6$ )

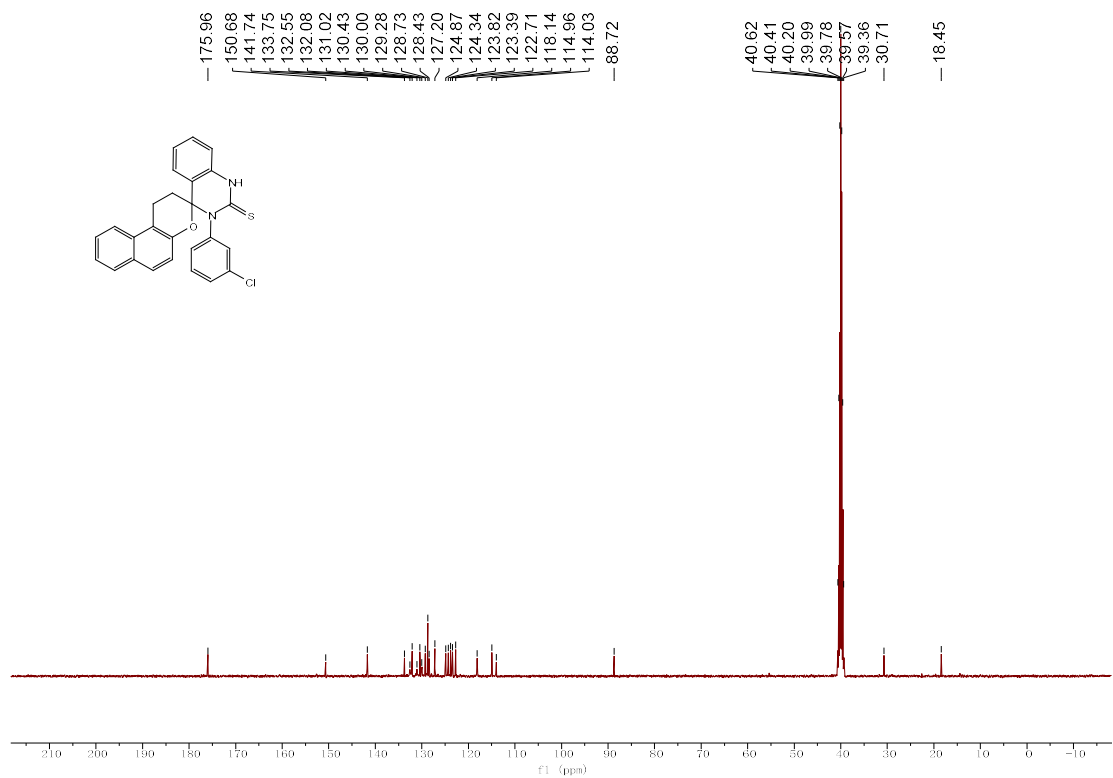

$^1\text{H}$  NMR spectra of **5i** (400 MHz, DMSO- $d_6$ )

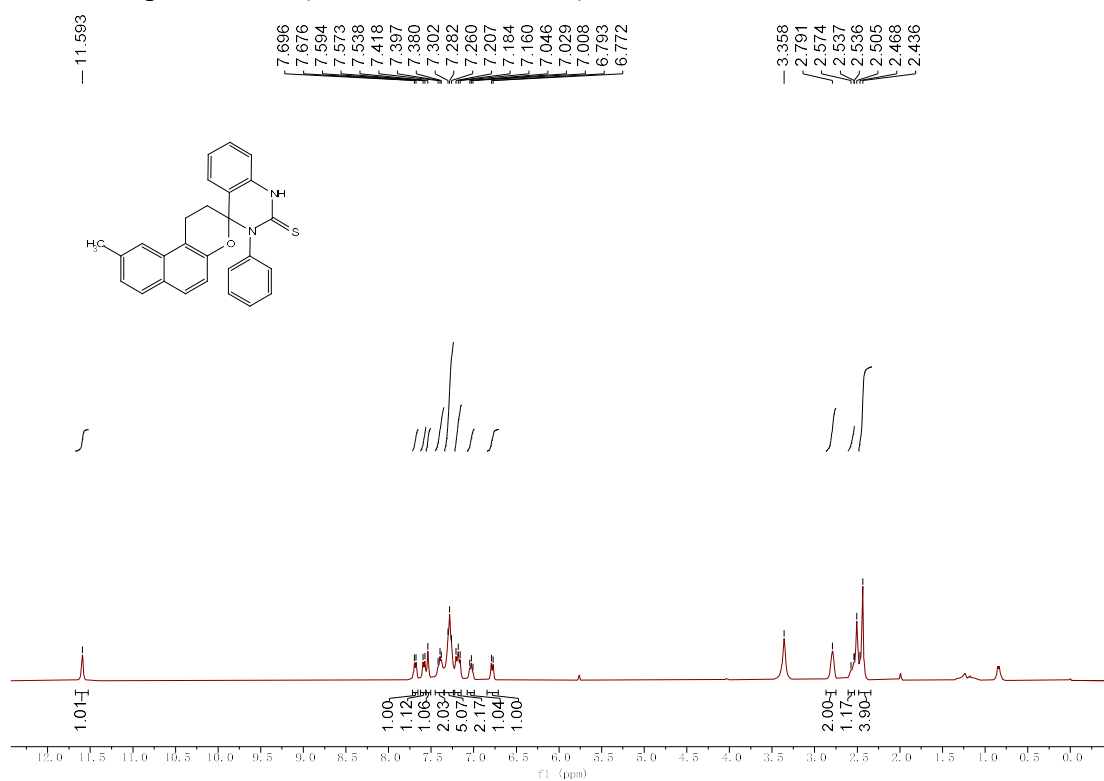

$^{13}\text{C}\{^1\text{H}\}$  NMR spectra of **5i** (100 MHz, DMSO- $d_6$ )

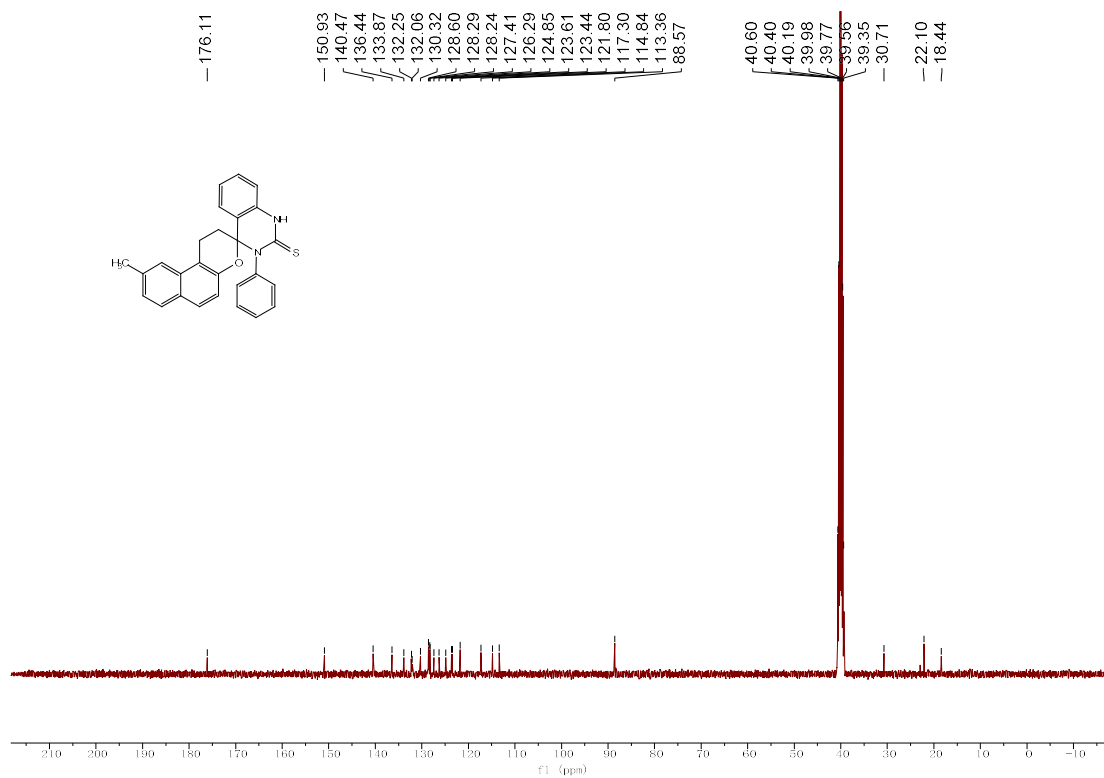

$^1\text{H}$  NMR spectra of **5j** (400 MHz, DMSO- $d_6$ )

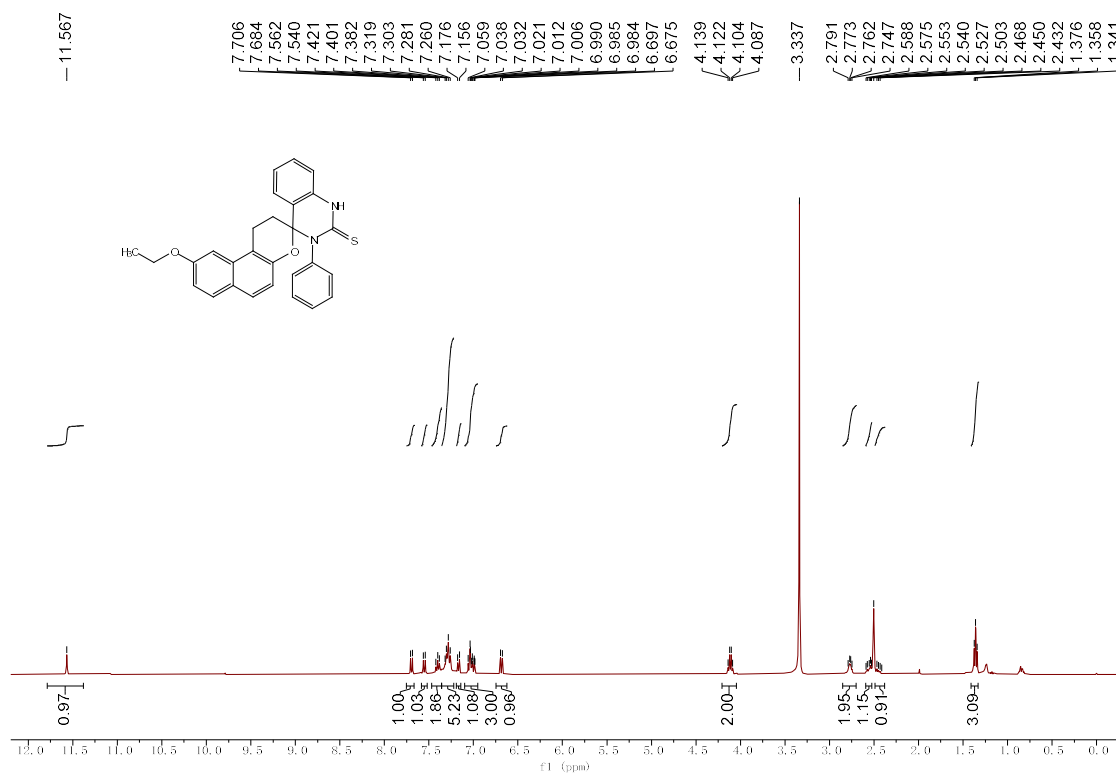

$^{13}\text{C}\{^1\text{H}\}$  NMR spectra of **5j** (100 MHz, DMSO- $d_6$ )

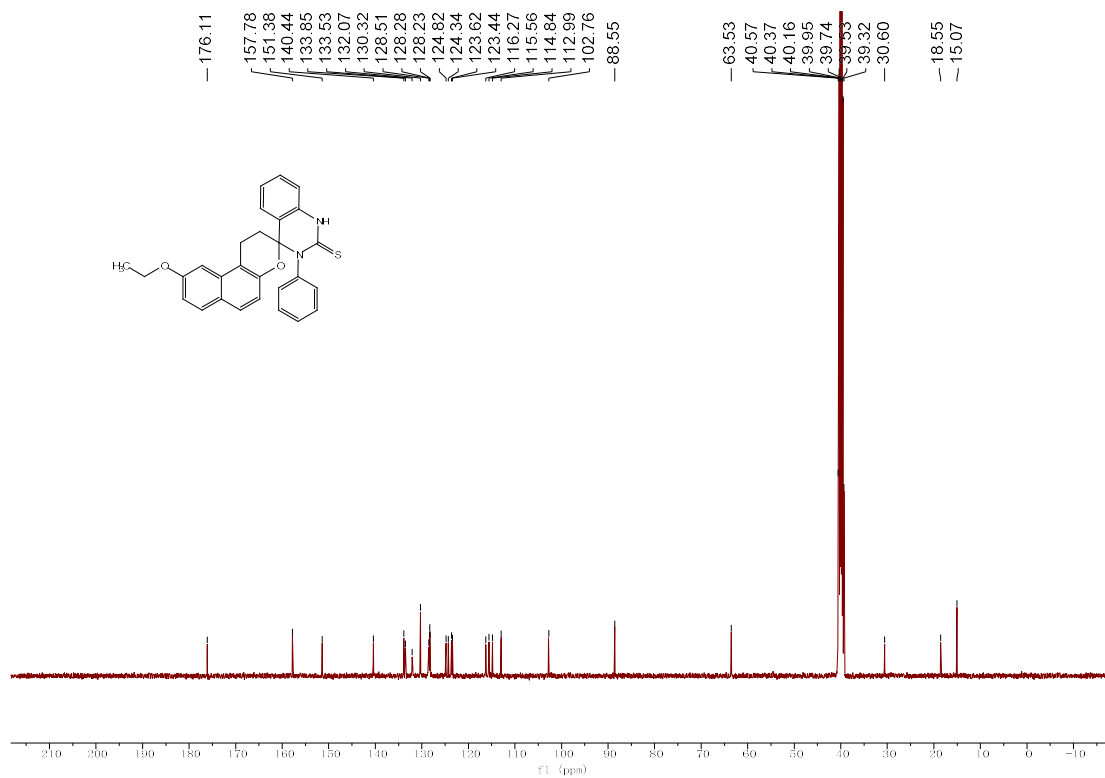

$^1\text{H}$  NMR spectra of **5k** (400 MHz, DMSO- $d_6$ )

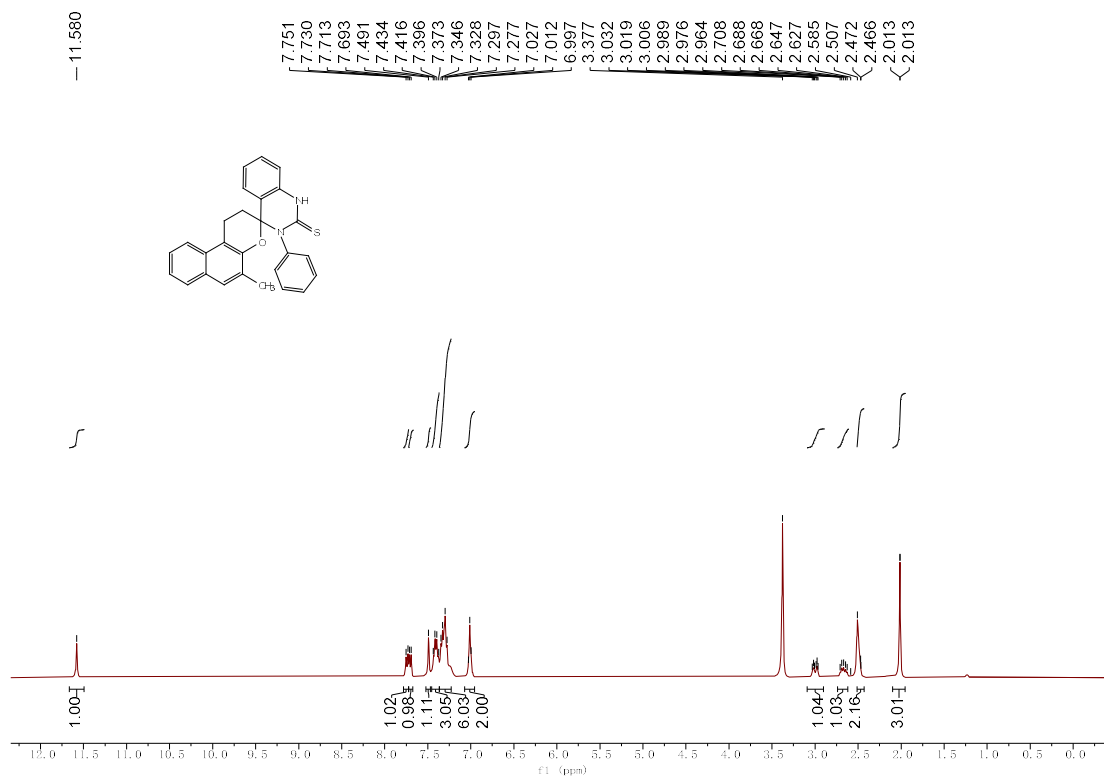

$^{13}\text{C}\{^1\text{H}\}$  NMR spectra of **5k** (100 MHz, DMSO- $d_6$ )

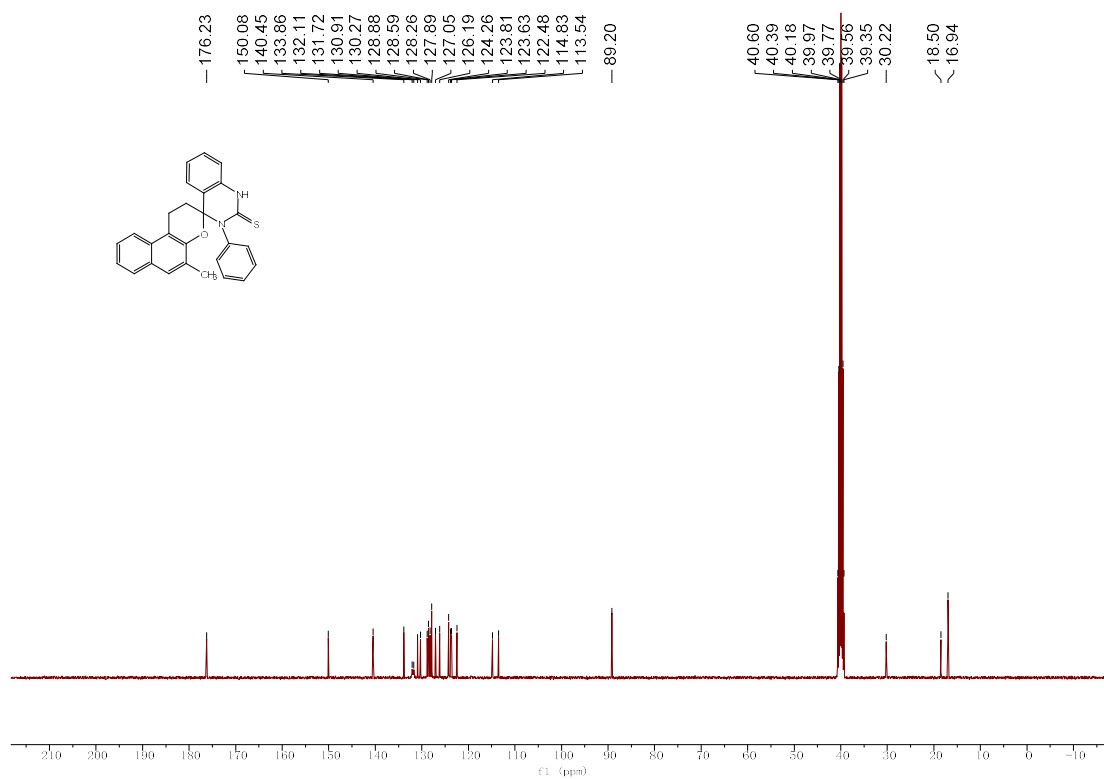



$^1\text{H}$  NMR spectra of **5I** (400 MHz, DMSO- $d_6$ )

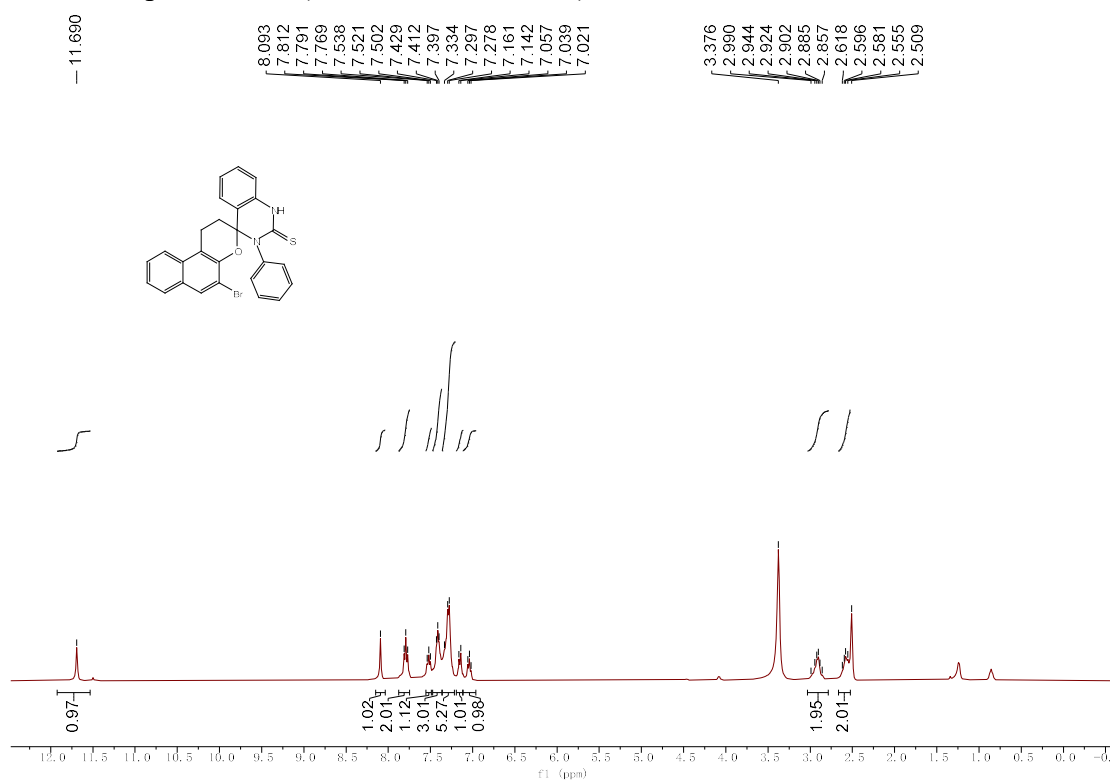

$^{13}\text{C}\{^1\text{H}\}$  NMR spectra of **5I** (100 MHz, DMSO- $d_6$ )

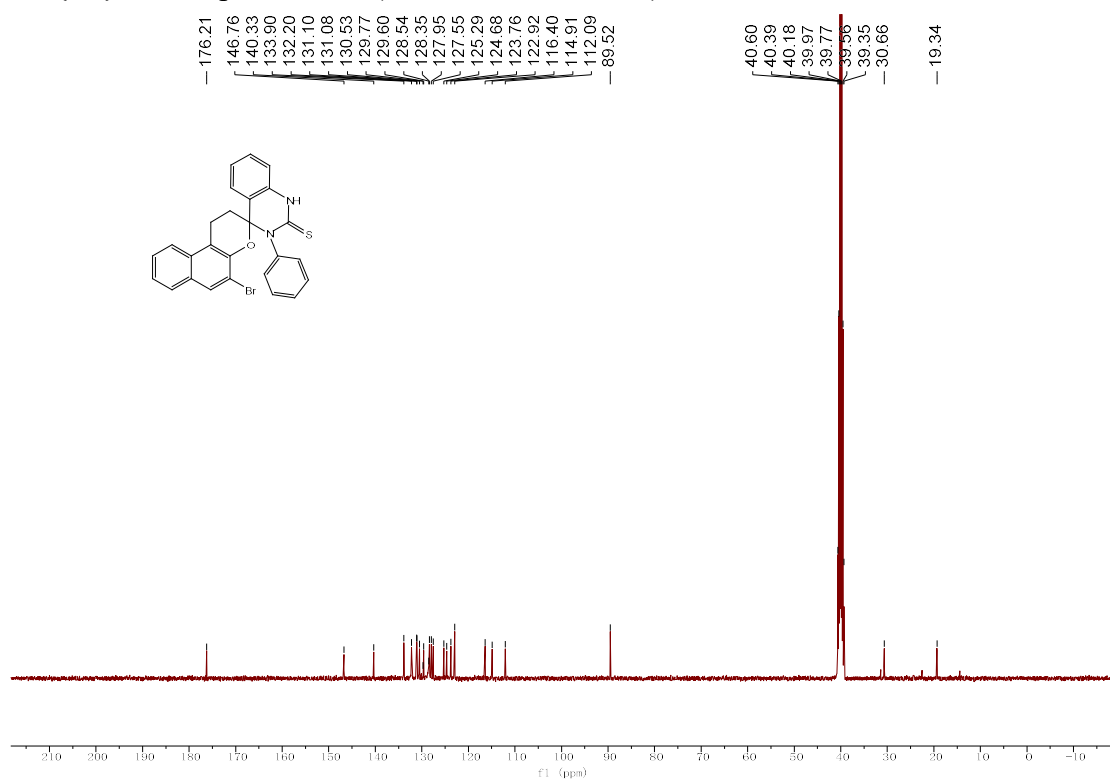

$^1\text{H}$  NMR spectra of **5m** (400 MHz, DMSO- $d_6$ )

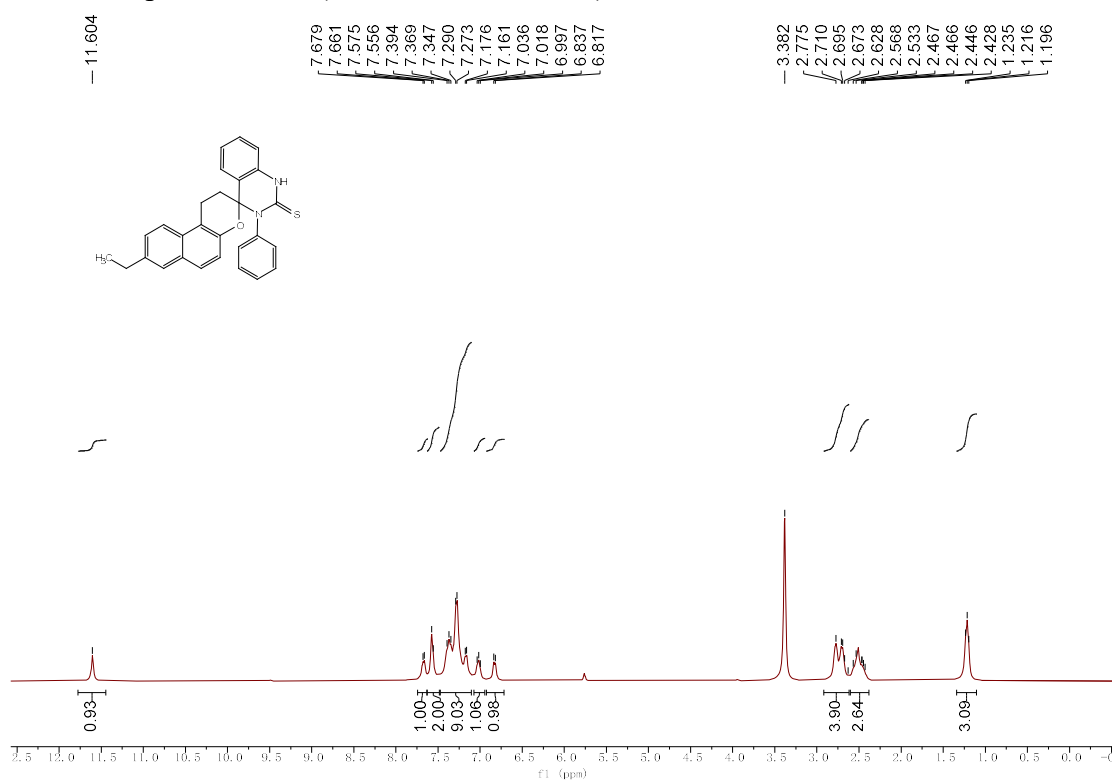

$^{13}\text{C}\{^1\text{H}\}$  NMR spectra of **5m** (100 MHz, DMSO- $d_6$ )

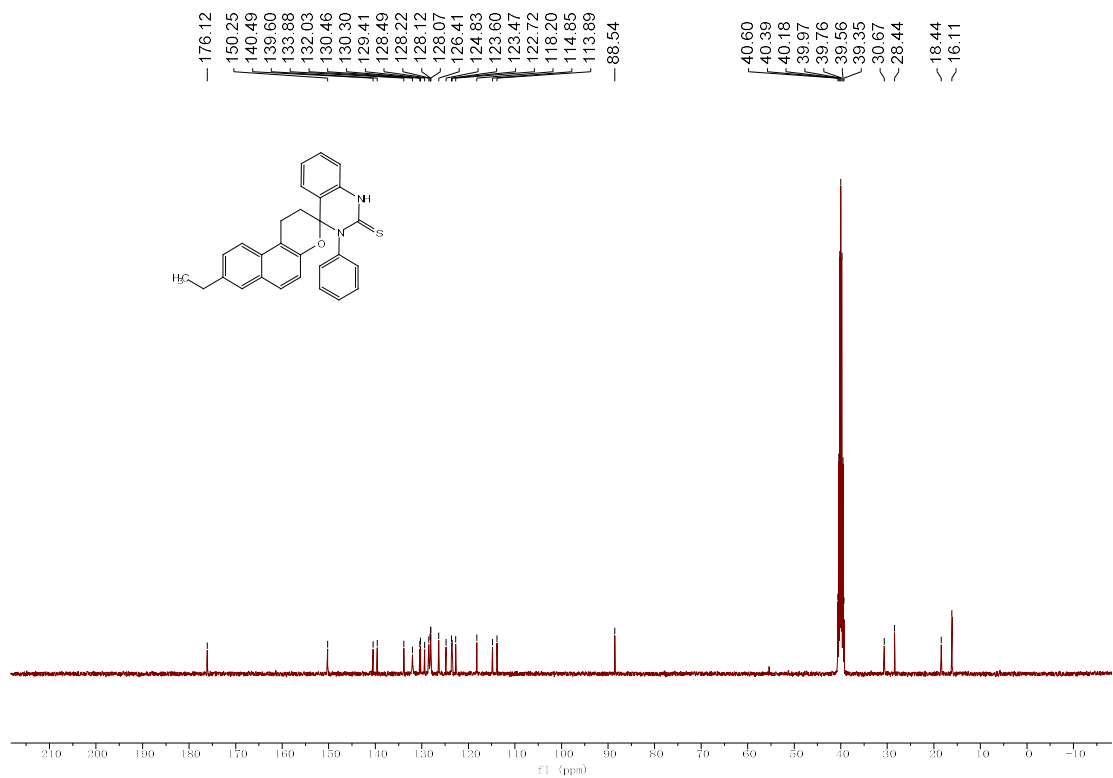

$^1\text{H}$  NMR spectra of **5n** (400 MHz, DMSO- $d_6$ )

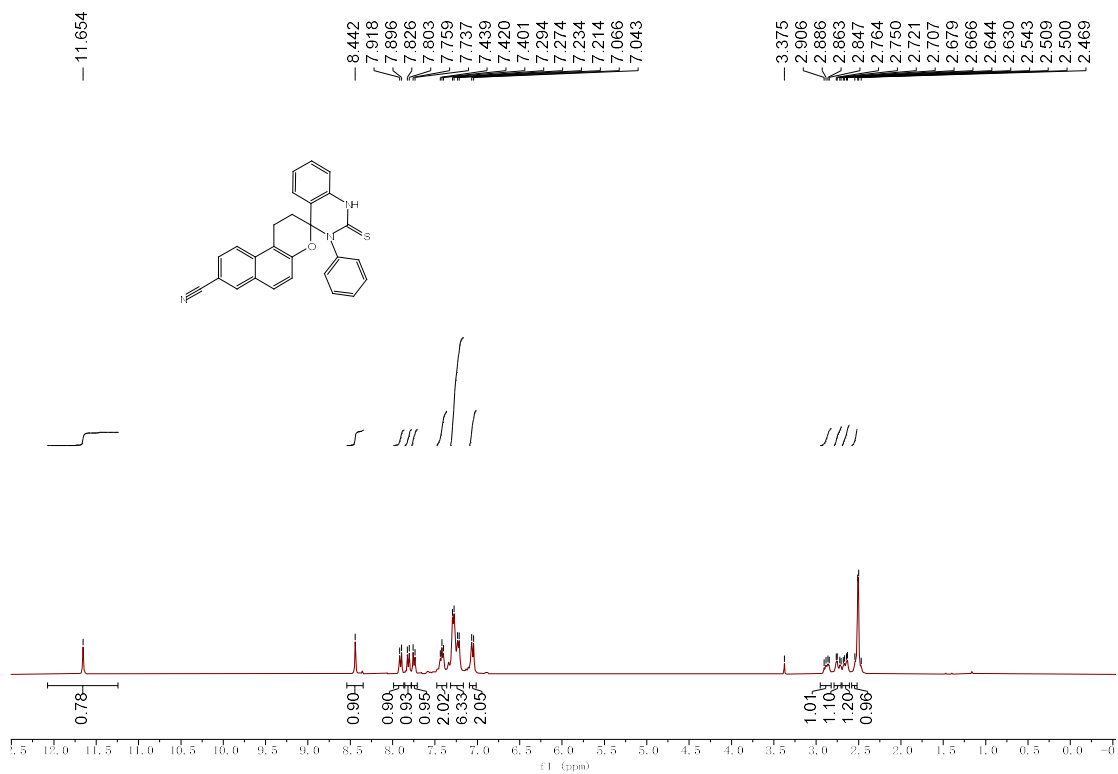

$^{13}\text{C}\{^1\text{H}\}$  NMR spectra of **5n** (100 MHz, DMSO- $d_6$ )

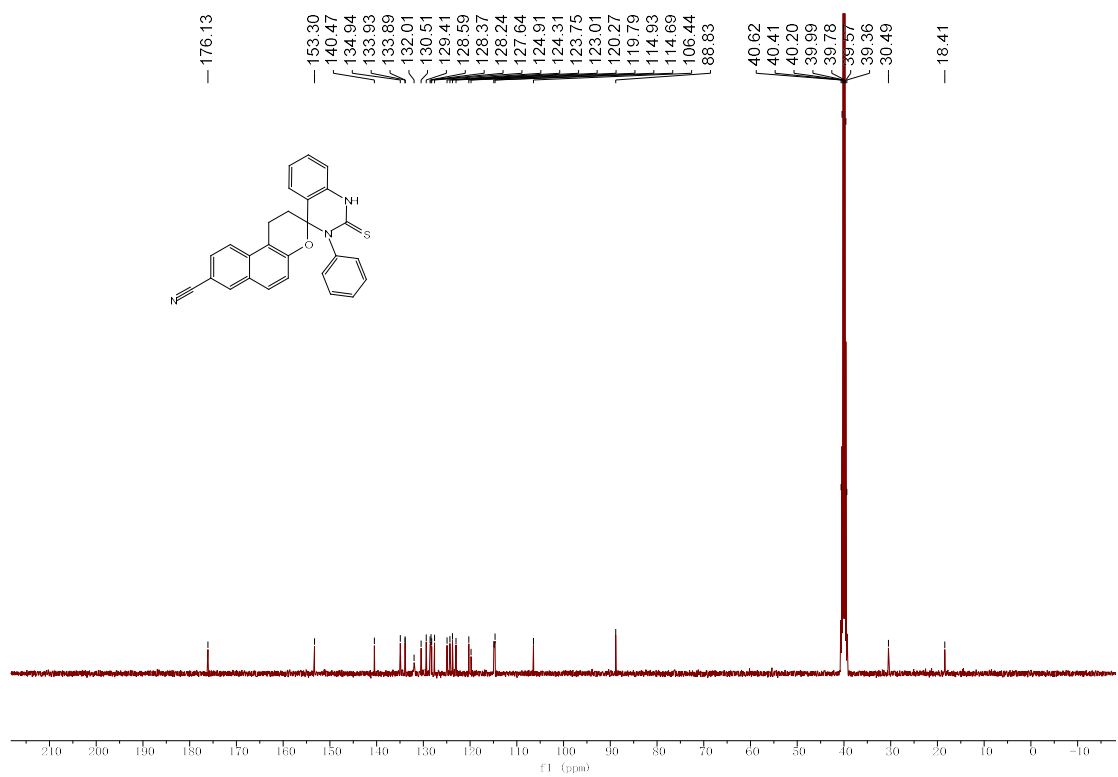

$^1\text{H}$  NMR spectra of **5o** (400 MHz, DMSO- $d_6$ )

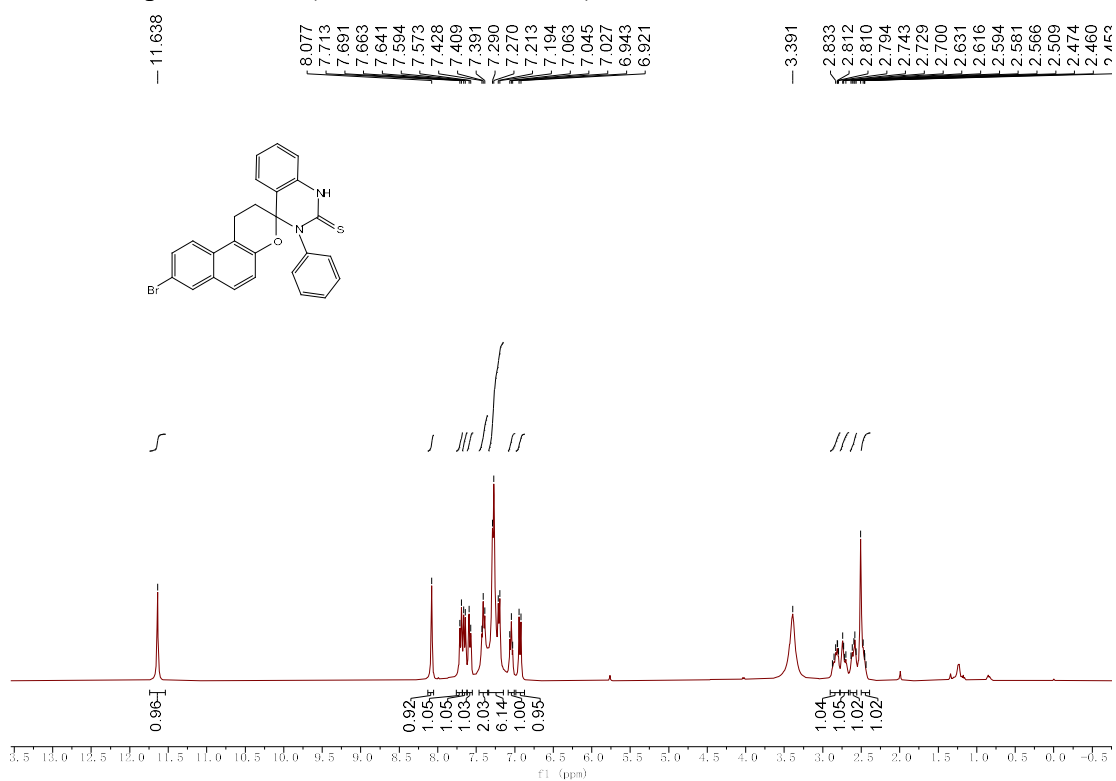

$^{13}\text{C}\{^1\text{H}\}$  NMR spectra of **5o** (100 MHz, DMSO- $d_6$ )

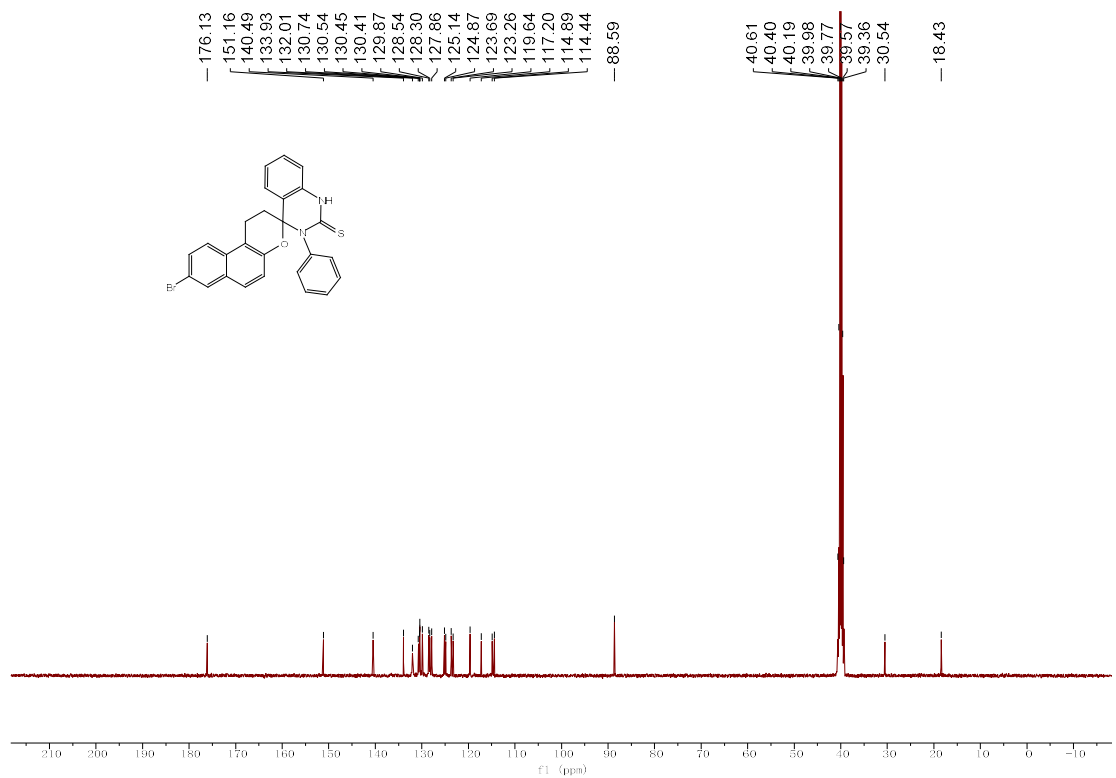

$^1\text{H}$  NMR spectra of **5p** (400 MHz, DMSO- $d_6$ )

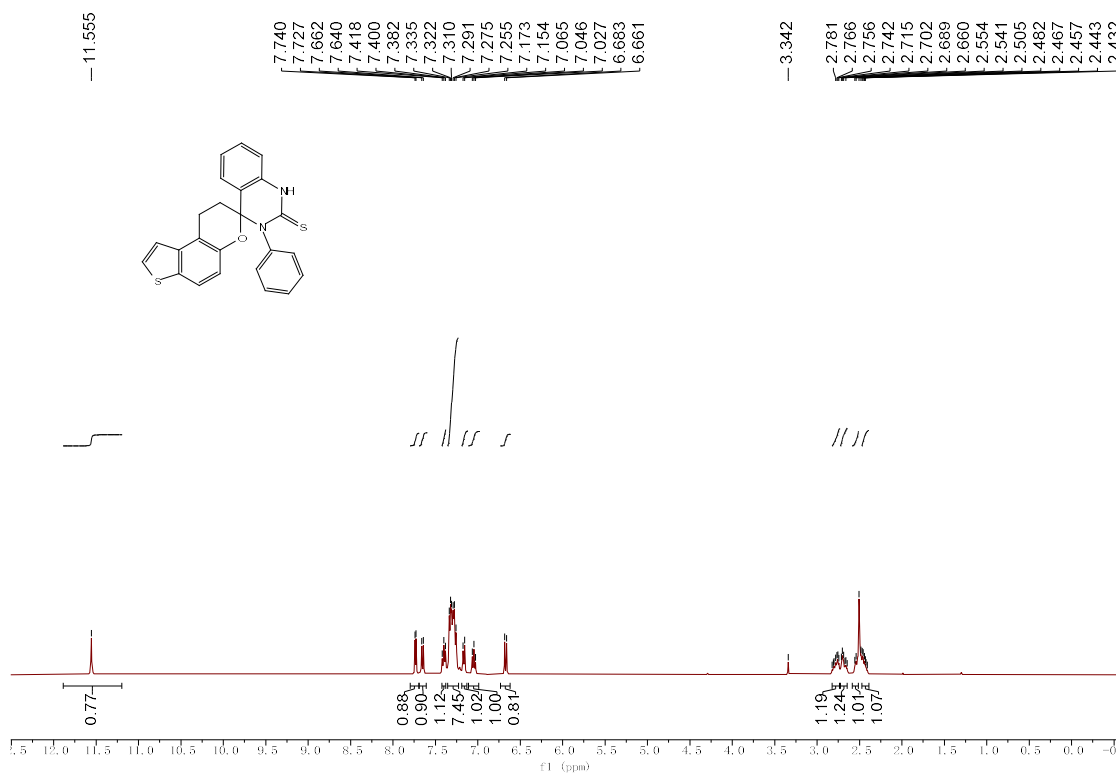

$^{13}\text{C}\{^1\text{H}\}$  NMR spectra of **5p** (100 MHz, DMSO- $d_6$ )

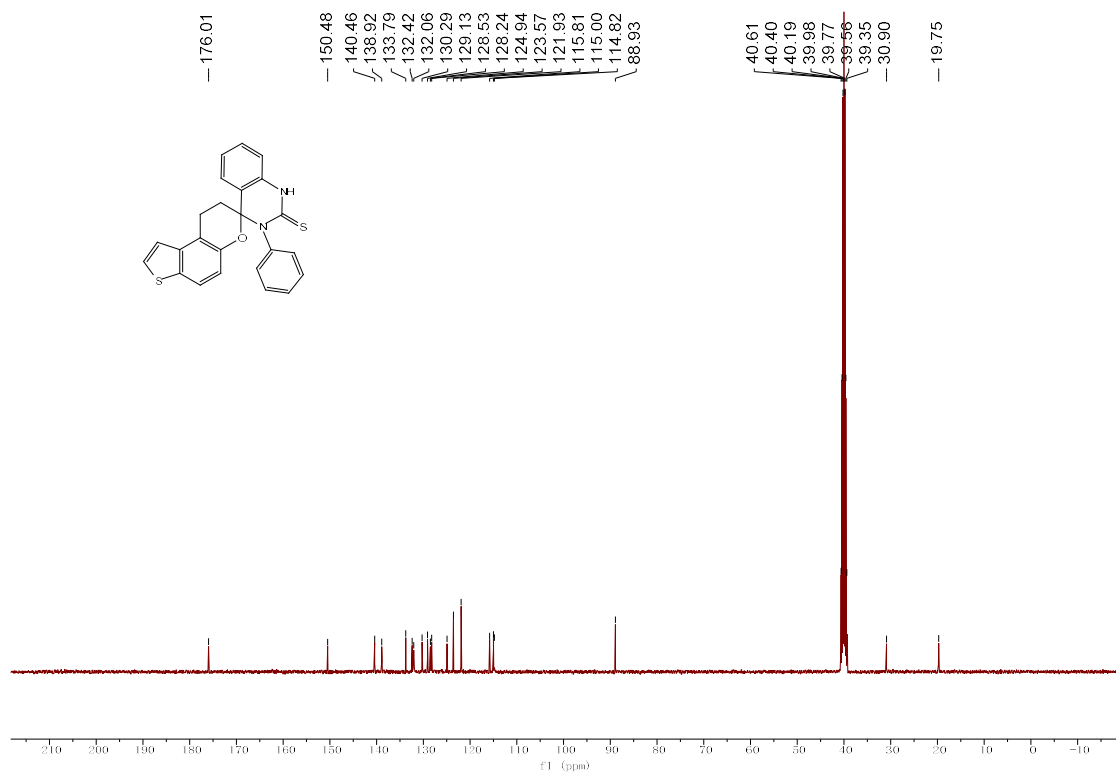

Supplement: d3qo02053c1.pdf [file d3qo02053c1.pdf]
